# Supplementary material for: Lysine Acetylation in the Proteome of Renal Tubular Epithelial Cells in Diabetic Nephropathy
Source: Front Genet. 2021 Nov 25;12:767135. doi: 10.3389/fgene.2021.767135 (PMC8657754; doi:10.3389/fgene.2021.767135)
Supplement: Supplementary file 8 [file Table5.xls]

## Sheet: Sheet2
Table S3 The prediction of Acetyltransferase
Gene name	Amino acid	Position	Modified sequence	Regulated Type	HG/NG Ratio	HG/NG P value	HAT	Scroe	Cutoff		CREBBP	EP300	KAT5	KAT8	KAT2B	KAT2A	HAT1
Abcb7	K	361	YDGFLK(1)TYETASLK	Down	0.639	0.000348186	CREBBP	1.706	1.348		478	527	198	212	203	40	18
							EP300	1.185	0.42
							KAT5	1	0.71
Acad10	K	1056	MELK(1)NQSR	Down	0.616	6.93838e-05	CREBBP	5.411	1.348
							EP300	1.806	0.42
Acad9	K	525	FGK(1)NIVEEQLVLK	Down	0.718	0.000389064	KAT8	11.2	7.222
							CREBBP	1.685	1.348
							KAT5	1.469	0.71
							EP300	0.69	0.42
Acad9	K	242	TEVVDSDGSK(1)TDK	Down	0.643	0.00346464	KAT8	8.3	7.222
							CREBBP	2.633	1.348
							KAT5	2.531	0.71
							KAT2A	2.275	1.382
							EP300	1.423	0.42
Acadl	K	322	K(1)AFGKTVAHIQTVQHK	Down	0.698	0.000179909	KAT8	8.3	7.222
							KAT2B	1.881	1.343
							CREBBP	1.815	1.348
							EP300	1.593	0.42
			KAFGK(1)TVAHIQTVQHK				KAT8	13	7.222
							CREBBP	1.996	1.348
							EP300	0.929	0.42
							KAT5	0.844	0.71
Acadl	K	42	LETPSAK(1)K	Down	0.711	6.45301e-07	KAT8	14.4	7.222
							CREBBP	4.448	1.348
							KAT2B	2.642	1.343
							EP300	2.216	0.42
							KAT5	0.781	0.71
Acadm	K	212	SNPDPK(1)VPASK	Down	0.696	0.00085864	CREBBP	3.23	1.348
							EP300	1.764	0.42
							KAT2A	1.42	1.382
							KAT2B	2.615	1.343
Acads	K	72	EHLFPTAQVK(1)K	Down	0.768	0.00695889	CREBBP	2.065	1.348
							EP300	1.214	0.42
Acadvl	K	72	AESK(1)SFAVGMFK	Down	0.685	0.00545615	EP300	1.895	0.42
							KAT2B	1.45	1.343
							KAT5	1.688	0.71
							KAT8	8.4	7.222
Acadvl	K	317	ASNTSEVYFDGVK(1)VPSENVLGEVGDGFK	Down	0.639	0.000124971	EP300	0.635	0.42
Acadvl	K	122	FFEEVNDPAK(1)NDALEK	Down	0.586	0.000235635	CREBBP	1.46	1.348
							EP300	1.27	0.42
Acadvl	K	557	K(1)GIVNEQFLLQR	Down	0.75	0.000183011	KAT8	7.6	7.222
							CREBBP	1.573	1.348
							KAT5	1.531	0.71
							KAT2B	1.413	1.343
							EP300	0.829	0.42
Acadvl	K	373	TQFGDK(1)IHNFGVIQEK	Down	0.679	0.000569195	EP300	0.472	0.42
							KAT2B	1.872	1.343
Acat1	K	242	GK(1)PDVVVK	Down	0.736	0.00146926	CREBBP	2.617	1.348
							EP300	1.474	0.42
							HAT1	14.8	14.143
							KAT2B	1.633	1.343
							KAT5	2	0.71
							KAT8	11.6	7.222
Acat1	K	248	GKPDVVVK(1)EDEEYKR	Down	0.655	0.000312492	CREBBP	3.157	1.348
							EP300	0.974	0.42
							KAT2B	1.367	1.343
Acat1	K	265	LK(1)TVFQK	Down	0.445	6.06817e-05	CREBBP	2.79	1.348
							EP300	1.609	0.42
Acat1	K	260	VDFSK(1)VPK	Down	0.503	0.00014692	CREBBP	3.419	1.348
							EP300	1.498	0.42
Acat1	K	220	SK(1)EAWDAGK	Down	0.741	0.00265308	CREBBP	1.778	1.348
							EP300	2.171	0.42
							KAT2B	2.138	1.343
							KAT5	1.594	0.71
							KAT8	8	7.222
Aco2	K	31	AK(1)VAMSHFEPSEYIR	Down	0.731	0.00092388	CREBBP	1.669	1.348
							EP300	1.319	0.42
							KAT2B	1.358	1.343
							KAT8	11.8	7.222
Aco2	K	743	CVIK(1)HPNGTQETILLNHTFNETQIEWFR	Down	0.73	0.000456043	EP300	0.474	0.42
Aco2	K	517	FNPETDFLTGK(1)DGK	Down	0.761	0.000883701	CREBBP	2.093	1.348
							EP300	1.113	0.42
							KAT5	2.656	0.71
							KAT8	9.1	7.222
Aco2	K	730	LTIQGLK(1)DFAPGK	Down	0.675	0.00145637	EP300	0.871	0.42
Aco2	K	549	SDFDPGQDTYQHPPK(1)DSSGQR	Down	0.604	0.000614604	CREBBP	1.754	1.348
							EP300	0.827	0.42
							KAT8	8.1	7.222
Aco2	K	138	VAVPSTIHCDHLIEAQVGGEK(1)DLR	Up	1.432	0.00110863	CREBBP	1.653	1.348
Aco2	K	50	YDLLEK(1)NINIVR	Down	0.727	0.0011946	EP300	0.756	0.42
Acot13	K	17	VMFK(1)VPGFDR	Down	0.546	0.000236433	CREBBP	2.302	1.348
							EP300	1.123	0.42
Acot9	K	102	DK(1)YVTVQNTVR	Down	0.703	0.00708026	CREBBP	2.552	1.348
							EP300	0.764	0.42
							KAT2B	1.422	1.343
Acot9	K	155	IDMCK(1)HSLSPEQDIK	Down	0.765	0.00131904	CREBBP	1.972	1.348
							EP300	0.986	0.42
Acsf2	K	182	QFK(1)TQQYYDILK	Down	0.633	0.000181703	CREBBP	2.935	1.348
Actb	K	50	HQGVMVGMGQK(1)DSYVGDEAQSK	Up	1.531	0.000431592	EP300	0.577	0.42
Aff4	K	742	NVPEK(1)HSR	Up	1.69	5.34897e-05	CREBBP	4.177	1.348
							EP300	2.272	0.42
Afg3l1	K	292	ILK(1)NNIDVR	Down	0.72	0.000569658	CREBBP	2.552	1.348
							EP300	1.095	0.42
Afg3l1	K	390	K(1)HAPCILFIDEIDAIGR	Down	0.66	0.036205	EP300	0.702	0.42
							KAT2B	1.761	1.343
							KAT8	9.3	7.222
Afg3l1	K	551	K(1)TQVLQPSEK	Down	0.695	0.00134548	CREBBP	3.496	1.348
							EP300	1.841	0.42
							KAT2B	1.725	1.343
							KAT5	1.281	0.71
							KAT8	7.7	7.222
Afg3l2	K	600	GK(1)GLGYAQYLPK	Down	0.678	0.000443765	CREBBP	1.903	1.348
							EP300	1.133	0.42
							HAT1	17.067	14.143
							KAT2B	1.945	1.343
							KAT5	2.656	0.71
							KAT8	14.5	7.222
Afg3l2	K	121	K(1)EDSHWWSR	Down	0.746	0.00718864	CREBBP	2.702	1.348
							EP300	1.585	0.42
							KAT2B	1.963	1.343
							KAT8	8.1	7.222
Afg3l2	K	568	K(1)TVAYHEAGHAVAGWYLEHADPLLK	Down	0.721	4.20696e-08	EP300	1.446	0.42
							KAT2B	1.725	1.343
							KAT8	9.1	7.222
Afg3l2	K	557	VIGGLEK(1)K	Down	0.65	0.000633758	CREBBP	2.907	1.348
							EP300	1.571	0.42
							KAT5	1.562	0.71
Afg3l2	K	305	VLKDEIDVK(1)FK	Down	0.726	0.00145543	CREBBP	2.306	1.348
							EP300	0.722	0.42
							KAT5	0.938	0.71
Ak3	K	189	AYEAQTEPVLQYYQK(1)K	Down	0.708	0.0162665	CREBBP	1.819	1.348
							EP300	1.02	0.42
Ak3	K	171	EDDKPETVIK(1)R	Down	0.673	0.000188043	CREBBP	3.206	1.348
							EP300	1.46	0.42
Ak3	K	29	ITK(1)HFELKHLSSGDLLR	Down	0.6	6.45947e-05	EP300	1.097	0.42
			ITKHFELK(1)HLSSGDLLR				KAT2B	1.761	1.343
Akr7a2	K	136	SQLETSLK(1)R	Down	0.705	0.000890424	CREBBP	4.46	1.348
							EP300	1.879	0.42
Aldh18a1	K	572	AAK(1)GIPVMGHSEGICHMYVDSEASVDK	Down	0.747	0.00666197	EP300	1.196	0.42
							KAT2B	1.752	1.343
							KAT8	12.4	7.222
Aldh18a1	K	68	SELK(1)HAK	Down	0.592	9.69488e-05	CREBBP	5.101	1.348
							EP300	2.111	0.42
							KAT5	0.719	0.71
Aldh18a1	K	347	VSGHVITDIVEGK(1)K	Down	0.763	0.00592777	CREBBP	2.008	1.348
							EP300	0.968	0.42
							KAT5	1.938	0.71
							KAT8	8.6	7.222
Aldh2	K	443	ANDSK(1)YGLAAAVFTK	Down	0.639	0.0011935	CREBBP	1.351	1.348
							EP300	0.938	0.42
							KAT5	1.594	0.71
							KAT8	9.6	7.222
Aldh2	K	430	FK(1)TIEEVVGR	Down	0.769	0.00436826	CREBBP	2.444	1.348
							EP300	1.31	0.42
Aldh2	K	377	ILGYIK(1)SGQQEGAK	Down	0.671	0.00385288	CREBBP	1.875	1.348
							EP300	1.51	0.42
							KAT5	2.594	0.71
							KAT8	7.6	7.222
Aldh2	K	54	K(1)TFPTVNPSTGEVICQVAEGNKEDVDK	Down	0.607	0.0046394	EP300	1.815	0.42
							KAT2B	1.725	1.343
							KAT8	7.7	7.222
Aldh2	K	370	TEQGPQVDETQFK(1)K	Down	0.65	0.000590642	CREBBP	3.036	1.348
							EP300	1.042	0.42
							KAT5	1.438	0.71
Ank3	K	1913	PCVPVGMK(1)K	Up	1.37	0.00178805	CREBBP	2.569	1.348
							EP300	2.069	0.42
Anxa2	K	152	EMYK(1)TDLEK	Up	1.336	0.000450526	CREBBP	3.738	1.348
							EP300	1.48	0.42
							KAT2B	1.569	1.343
							KAT5	0.938	0.71
Arpc5l	K	69	NSPINTK(1)NQAVK	Up	1.373	0.00119128	CREBBP	3.246	1.348
							EP300	1.708	0.42
Atad3	K	504	LK(1)VAQFDYGK	Down	0.769	0.0434545	CREBBP	2.23	1.348
							EP300	1.329	0.42
Atad3	K	490	MYFDK(1)YVLK	Down	0.658	0.000215031	CREBBP	1.714	1.348
							EP300	0.877	0.42
Atp5f1a	K	305	DNGK(1)HALIIYDDLSK	Down	0.704	0.000179059	EP300	0.875	0.42
							KAT5	1.344	0.71
							KAT8	13.4	7.222
Atp5f1a	K	239	RFNDGTDEK(1)K	Down	0.609	0.000175301	CREBBP	2.052	1.348
							EP300	1.323	0.42
							KAT5	1.906	0.71
Atp5f1a	K	498	GYLDK(1)LEPSK	Down	0.745	0.00445712	CREBBP	2.754	1.348
							EP300	1.123	0.42
							KAT2B	1.468	1.343
Atp5f1a	K	539	ISEQSDAK(1)LK	Down	0.602	0.000570675	CREBBP	3.129	1.348
							EP300	1.538	0.42
							KAT2B	1.872	1.343
							KAT8	8.1	7.222
Atp5f1a	K	531	SDGK(1)ISEQSDAK	Down	0.549	0.000906044	CREBBP	3.96	1.348
							EP300	2.373	0.42
							KAT2B	1.459	1.343
							KAT5	3.188	0.71
							KAT8	12.8	7.222
Atp5f1a	K	161	VVDALGNAIDGK(1)GPIGSK	Down	0.74	0.000493922	EP300	0.698	0.42
							KAT5	1.875	0.71
							KAT8	8	7.222
Atp5f1b	K	259	EGNDLYHEMIESGVINLK(1)DATSK	Down	0.575	5.23405e-05	CREBBP	2.157	1.348
Atp5f1b	K	198	VVDLLAPYAK(1)GGK	Down	0.744	0.00357793	CREBBP	1.73	1.348
							EP300	1.486	0.42
							KAT5	1.75	0.71
							KAT8	9.6	7.222
Atp5f1e	K	28	DALK(1)TEFK	Down	0.691	0.00986076	CREBBP	3.347	1.348
							EP300	1.738	0.42
							KAT5	1.125	0.71
Atp5if1	K	103	IQQLK(1)NNH	Down	0.702	0.000378016	CREBBP	3.77	1.348
							EP300	1.272	0.42
Atp5if1	K	72	K(1)HHEDEIDHHSK	Down	0.589	0.00284917	CREBBP	3.367	1.348
							EP300	1.242	0.42
							KAT2B	1.761	1.343
							KAT5	0.812	0.71
							KAT8	14.4	7.222
Atp5if1	K	83	KHHEDEIDHHSK(1)EIER	Down	0.552	0.00872446	CREBBP	1.464	1.348
							EP300	0.956	0.42
							KAT8	20.2	7.222
Atp5mg	K	61	IIQSAK(1)TGSFK	Down	0.697	0.0004289	CREBBP	2.419	1.348
							EP300	1.573	0.42
							KAT5	1.062	0.71
							KAT8	9.7	7.222
Atp5mg	K	66	TGSFK(1)HLTVK	Down	0.646	0.00591931	CREBBP	2.782	1.348
							EP300	1.325	0.42
							KAT8	8.1	7.222
Atp5mg	K	54	VELVPPTPAEIPTAIQSVK(1)K	Down	0.661	9.12574e-05	CREBBP	2.927	1.348
							EP300	0.81	0.42
Atp5pb	K	244	CIEDLK(1)LLAK	Down	0.765	0.00392365	CREBBP	1.823	1.348
							EP300	0.907	0.42
Atp5pd	K	63	ANVAK(1)PGLVDDFEK	Down	0.762	0.000280468	CREBBP	1.399	1.348
							EP300	0.885	0.42
							KAT5	1	0.71
							KAT8	12.6	7.222
Atp5pd	K	72	PGLVDDFEK(1)K	Down	0.656	2.51014e-05	CREBBP	2.153	1.348
							EP300	1.29	0.42
Atp5pd	K	99	EDVK(1)SCAEFVSGSQLR	Down	0.613	6.48141e-05	EP300	1.359	0.42
							KAT2B	1.798	1.343
Atp5pd	K	149	K(1)YPYWPHQPIENL	Down	0.73	0.00443243	CREBBP	1.423	1.348
							EP300	0.742	0.42
							KAT2B	1.587	1.343
							KAT8	7.9	7.222
Atp5pf	K	99	FDDPK(1)FEVIDKPQS	Down	0.606	0.00160842	CREBBP	1.496	1.348
							EP300	0.645	0.42
Atp5pf	K	79	LK(1)QMYGK	Down	0.719	0.00276677	CREBBP	3.101	1.348
							EP300	1.657	0.42
Atp5pf	K	84	QMYGK(1)GEMDTFPTFK	Down	0.764	0.00372772	CREBBP	1.895	1.348
							EP300	0.944	0.42
							KAT5	1.719	0.71
							KAT8	9.4	7.222
Atp5po	K	158	GEVPCTVTTASPLDDAVLSELK(1)TVLK	Down	0.541	0.000221265	CREBBP	1.407	1.348
Atp5po	K	90	VK(1)SLNDITK	Down	0.626	0.000627139	CREBBP	3.31	1.348
							EP300	1.411	0.42
							KAT5	0.812	0.71
							KAT8	9.2	7.222
Atp5po	K	199	YVDMSAK(1)SK	Down	0.691	0.000860272	CREBBP	4.218	1.348
							EP300	1.78	0.42
							KAT8	7.4	7.222
Auh	K	80	NALSK(1)NLLK	Down	0.704	0.00730192	CREBBP	2.738	1.348
							EP300	2.143	0.42
							KAT5	2.25	0.71
							KAT8	7.3	7.222
Bag2	K	9	ISAK(1)AHEGR	Up	1.431	0.00323678	CREBBP	3.718	1.348
							EP300	1.762	0.42
							KAT2B	1.468	1.343
							KAT5	0.781	0.71
							KAT8	12.3	7.222
Baz1b	K	397	K(0.095)PGKHSDKPLK	Down	0.752	0.0106838	CREBBP	3.512	1.348
							EP300	1.712	0.42
							KAT5	1.719	0.71
							KAT8	11.8	7.222
			KPGK(0.905)HSDKPLK				CREBBP	3.508	1.348
							EP300	2.514	0.42
							KAT2B	2.367	1.343
							KAT5	3.125	0.71
							KAT8	12.4	7.222
Baz1b	K	533	YELLEHK(1)K	Down	0.566	0.000152298	CREBBP	2.968	1.348
							EP300	1.31	0.42
							KAT8	13.6	7.222
Bbx	K	357	EAEFGK(1)SAK	Up	1.321	0.000498898	CREBBP	4.323	1.348
							EP300	2.44	0.42
							KAT2B	2.651	1.343
							KAT5	2.781	0.71
							KAT8	10.4	7.222
Bckdk	K	192	YFLDK(1)TLTSR	Down	0.682	0.000254143	CREBBP	2.165	1.348
							EP300	1.111	0.42
Bcl7a	K	196	QPSAESGLAAETSAVSQDLEGVPPSK(1)K	Up	1.378	0.0058601	CREBBP	2.25	1.348
Bclaf1	K	735	EYKPYK(1)DDSK	Up	1.824	0.00051676	CREBBP	3.96	1.348
							EP300	1.595	0.42
							KAT2B	2.303	1.343
Bod1l	K	710	DDPETHGK(1)GLPK	Up	1.38	0.00429983	CREBBP	2.109	1.348
							EP300	1.897	0.42
							KAT2B	1.56	1.343
							KAT5	3.688	0.71
							KAT8	13.6	7.222
Bola3	K	76	IESEEFK(1)EK	Down	0.724	0.0025703	CREBBP	5.145	1.348
							EP300	1.663	0.42
							KAT2B	2.11	1.343
Brd4	K	593	K(0.003)EPVPTKTKPPPTYESEEEDK	Up	2.116	8.99484e-05	CREBBP	2.536	1.348
							EP300	2.359	0.42
							KAT2B	1.963	1.343
							KAT8	7.8	7.222
			KEPVPTK(0.867)TKPPPTYESEEEDK				CREBBP	2.613	1.348
							EP300	1.758	0.42
							KAT2B	1.734	1.343
							KAT5	0.75	0.71
			KEPVPTKTK(0.13)PPPTYESEEEDK				CREBBP	2.065	1.348
							EP300	1.294	0.42
C1qbp	K	88	AFVEFLTDEIK(1)EEK	Down	0.588	0.000914815	CREBBP	2.931	1.348
							EP300	1.01	0.42
C1qbp	K	91	AFVEFLTDEIKEEK(1)K	Down	0.611	4.21171e-05	CREBBP	2.431	1.348
							EP300	0.915	0.42
C1qbp	K	176	K(1)TLVLDCHYPEDEIGHEDEAESDIFSIK	Down	0.746	0.000266622	EP300	0.583	0.42
							KAT2B	1.725	1.343
							KAT8	8.4	7.222
Cars2	K	308	SLK(1)NYITIK	Down	0.671	0.00253178	CREBBP	2.206	1.348
							EP300	1.302	0.42
Casp8ap2	K	308	SSTGMGYK(1)SER	Up	2.461	0.000445298	CREBBP	4.891	1.348
							EP300	1.752	0.42
							KAT2A	1.696	1.382
							KAT2B	1.743	1.343
							KAT5	1.25	0.71
Cbr4	K	189	HLK(1)EEHFK	Down	0.701	0.00249579	CREBBP	4.27	1.348
							EP300	1.417	0.42
							KAT8	9.4	7.222
Ccdc112	K	53	IHNNVK(1)K	Up	1.49	0.00897217	CREBBP	4.161	1.348
							EP300	1.617	0.42
							KAT5	0.875	0.71
Ccdc112	K	183	VRNK(0.004)HKGK	Down	0.5	8.68417e-05	CREBBP	4.665	1.348
							EP300	1.994	0.42
							KAT5	1.812	0.71
			VRNKHK(0.996)GK				CREBBP	4.718	1.348
							EP300	2.02	0.42
							KAT8	13.8	7.222
Ccdc12	K	53	QLREEGEEVGK(1)HR	Up	1.404	0.00482599	CREBBP	2.81	1.348
							EP300	1.161	0.42
							KAT8	7.9	7.222
Cct4	K	21	GK(1)SAYQDR	Up	1.396	0.00150525	CREBBP	3.165	1.348
							EP300	2.621	0.42
							HAT1	16.333	14.143
							KAT2B	2.083	1.343
							KAT5	3.656	0.71
							KAT8	14.9	7.222
Cdc73	K	331	K(1)TQTPAAQPVPR	Up	1.568	0.00160968	CREBBP	3.21	1.348
							EP300	1.736	0.42
							KAT2B	1.725	1.343
							KAT5	1.125	0.71
							KAT8	9.3	7.222
Cdk12	K	490	HPAK(1)DLK	Up	1.441	0.000348373	CREBBP	3.46	1.348
							EP300	2.258	0.42
							KAT5	0.875	0.71
							KAT8	19.9	7.222
Cfl1	K	22	K(1)SSTPEEVK	Up	1.65	0.00301195	CREBBP	4.613	1.348
							EP300	2.802	0.42
							KAT2B	2.028	1.343
							KAT5	2.281	0.71
							KAT8	9.7	7.222
Cisd3	K	124	ATQRPPYCDGTHK(1)SEQVQK	Down	0.601	0.00364462	CREBBP	1.988	1.348
							EP300	0.69	0.42
							KAT8	10.1	7.222
Clint1	K	291	TANPSK(1)TIDLGAAAHYTGDK	Up	1.46	0.00377952	EP300	1.276	0.42
Clpp	K	199	K(1)QLYNIYAK	Down	0.689	0.00028303	CREBBP	2.077	1.348
							EP300	1.871	0.42
							KAT2B	2.101	1.343
							KAT5	2.125	0.71
							KAT8	9	7.222
Clpp	K	207	QLYNIYAK(1)HTK	Down	0.721	0.0112623	CREBBP	3.266	1.348
							EP300	1.131	0.42
							KAT8	8.7	7.222
Cops3	K	304	QCLSSLYK(1)K	Down	0.692	0.00562812	CREBBP	4.06	1.348
							EP300	1.649	0.42
							KAT5	1.375	0.71
Coro1c	K	407	K(1)NILDSKPAANK	Up	1.557	0.0015936	CREBBP	2.556	1.348
							EP300	2.016	0.42
							KAT2B	1.771	1.343
							KAT5	1.031	0.71
							KAT8	8.3	7.222
Cox17	K	30	KPLKPCCACPETK(1)K	Up	1.611	0.00335318	CREBBP	1.581	1.348
							EP300	1.097	0.42
Cox4i1	K	67	EK(1)ADWSSLSR	Down	0.665	0.000168732	CREBBP	2.27	1.348
							EP300	2.401	0.42
							KAT2B	2.083	1.343
Cox5a	K	109	ILEVVK(1)DK	Down	0.655	0.00537705	CREBBP	3.738	1.348
							EP300	1.115	0.42
Cox7c	K	25	SHYEEGPGK(1)NLPFSVENK	Down	0.734	0.00660907	EP300	1.486	0.42
							KAT5	0.906	0.71
							KAT8	14	7.222
Cpt2	K	453	GGK(1)EFLK	Down	0.766	0.00192851	CREBBP	2.331	1.348
							EP300	2.421	0.42
							HAT1	15.533	14.143
							KAT2A	2.449	1.382
							KAT2B	2.596	1.343
							KAT5	4.906	0.71
							KAT8	15.1	7.222
Cpt2	K	79	K(1)TEVLCK	Down	0.656	0.00366612	CREBBP	2.621	1.348
							EP300	1.407	0.42
							KAT2B	1.725	1.343
							KAT5	1.031	0.71
							KAT8	7.5	7.222
Crat	K	268	AYNNLIK(1)DK	Down	0.736	0.000441326	CREBBP	3.782	1.348
							EP300	1.21	0.42
Crebbp	K	1807	VVQHTK(1)GCKR	Up	1.372	0.00255477	CREBBP	2.411	1.348
							EP300	1.532	0.42
			VVQHTKGCK(1)R				CREBBP	2.827	1.348
							EP300	1.585	0.42
							KAT2A	1.478	1.382
							KAT2B	1.954	1.343
							KAT5	0.844	0.71
							KAT8	7.9	7.222
Crebbp	K	1584	KKEESTAASETPEGSQGDSK(1)NAKK	Up	1.458	0.0123074	CREBBP	3.379	1.348
							EP300	1.617	0.42
							KAT2A	2.449	1.382
							KAT5	0.938	0.71
			KKEESTAASETPEGSQGDSKNAK(1)K				CREBBP	4.149	1.348
							EP300	0.976	0.42
							KAT2B	1.963	1.343
							KAT5	0.969	0.71
Crebrf	K	176	QNPLPPSSFPSK(1)K	Up	1.488	0.00164974	CREBBP	1.956	1.348
							EP300	2.226	0.42
							KAT2A	1.464	1.382
Crip2	K	23	VSSLGK(1)DWHK	Up	1.596	0.000466829	CREBBP	2.129	1.348
							EP300	1.627	0.42
							HAT1	16.467	14.143
							KAT5	4.094	0.71
							KAT8	11.2	7.222
Cs	K	366	EFALK(1)HLPK	Down	0.757	0.000225816	CREBBP	2.581	1.348
							EP300	1.639	0.42
Cs	K	76	GMK(1)GLVYETSVLDPDEGIR	Down	0.692	3.65359e-05	EP300	0.526	0.42
							KAT2B	1.505	1.343
Cs	K	450	PK(1)SMSTDGLMK	Down	0.678	0.00034806	CREBBP	3.605	1.348
							EP300	1.903	0.42
							KAT2B	1.431	1.343
Cs	K	52	TFK(1)QQHGK	Down	0.535	5.41978e-06	CREBBP	4.762	1.348
							EP300	1.639	0.42
Ctsz	K	66	PHEYLSPADLPK(1)NWDWR	Down	0.715	0.00477921	EP300	0.599	0.42
Cyb5b	K	144	HFWADSK(1)SS	Down	0.769	0.0020461	CREBBP	2.435	1.348
							EP300	1.708	0.42
Cyc1	K	310	HK(1)WSVLK	Down	0.694	0.00280008	CREBBP	2.476	1.348
							EP300	1.627	0.42
							KAT8	13.5	7.222
Dars2	K	380	K(1)EDIEFIR	Down	0.727	0.000493212	CREBBP	2.452	1.348
							EP300	1.546	0.42
							KAT2B	1.963	1.343
							KAT5	1.094	0.71
Dars2	K	159	KLPFEIK(1)DFVK	Down	0.71	0.00502909	CREBBP	1.411	1.348
							EP300	1.228	0.42
Ddx3x	K	50	EATK(1)GFYDK	Up	1.454	0.000237097	CREBBP	2.145	1.348
							EP300	1.883	0.42
							KAT2B	2.174	1.343
							KAT5	1	0.71
Ddx3x	K	81	GK(1)SSFFGDR	Up	1.426	0.00287	CREBBP	2.331	1.348
							EP300	2.01	0.42
							HAT1	16.333	14.143
							KAT2B	2.083	1.343
							KAT5	3.094	0.71
							KAT8	13.9	7.222
Det1	K	316	AEQDGSAMAK(1)R	Up	2.024	0.00806572	CREBBP	3.782	1.348
							EP300	1.944	0.42
							KAT2B	1.844	1.343
							KAT5	2.25	0.71
							KAT8	12.3	7.222
Dhx9	K	29	AVGNK(1)NR	Up	1.865	0.00170051	CREBBP	4.395	1.348
							EP300	2.169	0.42
							KAT2A	1.652	1.382
							KAT5	1.562	0.71
Dis3	K	952	ALTAPGGK(1)K	Up	1.351	0.00194837	CREBBP	3.315	1.348
							EP300	2.319	0.42
							KAT2A	2.058	1.382
							KAT2B	2.092	1.343
							KAT5	2.938	0.71
							KAT8	15.3	7.222
Dld	K	146	QNK(1)VVHVNGFGK	Down	0.758	0.00259235	CREBBP	1.839	1.348
							EP300	1.171	0.42
Dlst	K	268	HK(1)DAFLK	Down	0.679	0.000304903	CREBBP	2.407	1.348
							EP300	1.869	0.42
							KAT8	14.4	7.222
Dnaja3	K	118	AYYQLAK(1)K	Down	0.705	0.000591908	CREBBP	3.169	1.348
							EP300	1.702	0.42
							KAT8	7.7	7.222
Dnaja3	K	130	YHPDTNKDDPK(1)AK	Down	0.643	0.0250772	CREBBP	2.383	1.348
							EP300	1.232	0.42
							KAT2B	1.523	1.343
Dnmt1	K	1124	GK(1)HQVSEPK	Up	1.401	5.44933e-05	CREBBP	4.089	1.348
							EP300	2.071	0.42
							HAT1	15.067	14.143
							KAT2B	2.073	1.343
							KAT5	2.75	0.71
							KAT8	14.7	7.222
Eci1	K	270	EADIQNFTSFISK(1)DSIQK	Down	0.693	0.00375867	CREBBP	1.54	1.348
							EP300	0.827	0.42
Eci1	K	247	K(1)ATADNLIK	Down	0.674	0.000805709	CREBBP	2.56	1.348
							EP300	2.407	0.42
							KAT2B	1.881	1.343
							KAT5	2.094	0.71
							KAT8	10.9	7.222
Eed	K	19	EVSTAPAGTDMPAAK(1)K	Up	1.346	5.17524e-05	CREBBP	2.573	1.348
							EP300	1.688	0.42
							KAT5	1	0.71
							KAT8	7.9	7.222
Elavl1	K	55	DK(1)VAGHSLGYGFVNYVTAK	Up	1.42	0.0055184	EP300	0.73	0.42
Ep400	K	2354	SK(1)NNRPLR	Up	1.458	0.000146198	CREBBP	3.927	1.348
							EP300	2.347	0.42
							KAT2B	1.936	1.343
							KAT5	1.75	0.71
							KAT8	12.3	7.222
Ep400	K	1213	VHWK(1)CLVVDEMQRVK	Down	0.562	0.000301768	CREBBP	1.496	1.348
Ep400	K	1159	WELELK(1)R	Up	2.477	1.72278e-05	CREBBP	2.984	1.348
							EP300	1.405	0.42
Etfa	K	62	CDK(1)VVQDLCK	Down	0.71	0.0269035	CREBBP	2.101	1.348
							EP300	0.726	0.42
Etfa	K	226	GLK(1)SGENFK	Down	0.711	0.000278453	CREBBP	3.032	1.348
							EP300	1.883	0.42
							KAT2B	1.55	1.343
							KAT5	1.562	0.71
							KAT8	10.3	7.222
Etfa	K	206	LTK(1)SDRPELTGAK	Down	0.635	0.000140771	CREBBP	3.415	1.348
							EP300	2.335	0.42
							KAT5	1.094	0.71
Fam3c	K	97	ICLEDNVLMSGVK(1)NNVGR	Down	0.638	7.6891e-05	EP300	0.79	0.42
Fh	K	112	AAAEVNQEYGLDPK(1)IASAIMK	Down	0.665	8.58046e-06	CREBBP	1.581	1.348
							EP300	0.421	0.42
Fh	K	169	AIEMLGGELGSK(1)K	Down	0.643	0.028776	CREBBP	1.766	1.348
							EP300	1.593	0.42
							KAT2A	2.319	1.382
							KAT5	1	0.71
Fh	K	470	IAK(1)TAHK	Down	0.746	0.00281462	CREBBP	3.629	1.348
							EP300	2.411	0.42
							KAT5	2.531	0.71
							KAT8	11.6	7.222
Fh	K	58	VEFDTFGELK(1)VPTDK	Down	0.603	0.00154648	CREBBP	1.476	1.348
							EP300	0.472	0.42
Fh	K	63	VPTDK(1)YYGAQTVR	Down	0.714	0.0124968	CREBBP	1.774	1.348
							EP300	0.929	0.42
							KAT2B	1.486	1.343
Flad1	K	283	LAESGSCLGK(1)K	Down	0.709	0.00955783	CREBBP	3.141	1.348
							EP300	1.732	0.42
							KAT2B	1.486	1.343
							KAT5	1.938	0.71
							KAT8	8.8	7.222
Flnb	K	1780	ATPEIVDNK(1)DGTVTVR	Up	1.88	0.000377605	EP300	0.736	0.42
Fxn	K	194	ALNTK(1)LDLSSLAYSGK	Down	0.74	0.00282011	CREBBP	2.185	1.348
							EP300	1.046	0.42
Gatd3a	K	217	ALGAK(1)HCVK	Down	0.636	0.00170687	CREBBP	1.48	1.348
							EP300	1.639	0.42
							KAT2A	2.014	1.382
							KAT2B	1.394	1.343
							KAT5	2.25	0.71
							KAT8	10.7	7.222
Gatd3a	K	221	HCVK(1)GVTEAHVDQK	Down	0.724	0.00269392	CREBBP	1.923	1.348
							EP300	0.679	0.42
							KAT5	0.875	0.71
							KAT8	12.8	7.222
Gatd3a	K	168	EFHGAK(1)K	Down	0.737	0.000785774	CREBBP	3.375	1.348
							EP300	2.121	0.42
							KAT2B	2.349	1.343
							KAT5	1	0.71
							KAT8	21.2	7.222
Gatd3a	K	231	GVTEAHVDQK(1)NK	Down	0.584	0.00356595	CREBBP	2.992	1.348
							EP300	1.113	0.42
Gatd3a	K	162	VLK(1)EFHGAK	Down	0.668	0.00267727	CREBBP	2.161	1.348
							EP300	1.319	0.42
Gfm1	K	540	ETIVAPVPFDFTHK(1)K	Down	0.719	0.00752639	CREBBP	1.444	1.348
							EP300	0.742	0.42
							KAT8	9	7.222
Gfm1	K	379	NYQGELK(1)K	Down	0.712	0.00221164	CREBBP	3.815	1.348
							EP300	1.7	0.42
							KAT5	1.438	0.71
Gfm1	K	460	PSNK(1)NDLEK	Down	0.736	0.00314555	CREBBP	3.855	1.348
							EP300	2.161	0.42
							KAT2B	2.44	1.343
							KAT5	0.969	0.71
Gls	K	181	LK(1)ECMDMLR	Down	0.76	0.0016159	CREBBP	1.827	1.348
							EP300	1.298	0.42
							KAT5	0.812	0.71
Gls	K	401	NFAIGYYLK(1)EK	Down	0.767	0.00237563	CREBBP	1.907	1.348
							EP300	0.843	0.42
Gls	K	250	QSGGK(1)VADYIPQLAK	Down	0.755	0.0294003	CREBBP	1.669	1.348
							EP300	0.938	0.42
							KAT2B	1.991	1.343
							KAT5	2.125	0.71
							KAT8	13.4	7.222
Gna13	K	363	DVK(1)DTILHDNLK	Down	0.363	7.3744e-05	CREBBP	1.847	1.348
							EP300	0.542	0.42
Got2	K	90	AEAQIAAK(1)NLDK	Down	0.727	0.000406532	CREBBP	2.581	1.348
							EP300	1.841	0.42
							KAT5	1.219	0.71
Got2	K	122	ASAELALGENNEVLK(1)SGR	Down	0.692	0.000959884	CREBBP	1.871	1.348
							EP300	0.683	0.42
Got2	K	73	DDNGK(1)PYVLPSVR	Down	0.75	0.00130972	EP300	1.425	0.42
							KAT8	10.1	7.222
Got2	K	404	EFSVYMTK(1)DGR	Down	0.679	6.53077e-05	CREBBP	2.234	1.348
							EP300	1.302	0.42
							KAT5	0.781	0.71
Got2	K	234	EIASVVK(1)K	Down	0.683	3.22438e-05	CREBBP	4.044	1.348
							EP300	1.55	0.42
Got2	K	338	K(1)QWLQEVK	Down	0.709	0.00014257	CREBBP	2	1.348
							EP300	1.742	0.42
							KAT2B	2.101	1.343
							KAT5	1.062	0.71
Got2	K	345	QWLQEVK(1)GMADR	Down	0.701	0.000479692	CREBBP	1.746	1.348
							EP300	0.881	0.42
Got2	K	396	LTK(1)EFSVYMTK	Down	0.609	0.00660704	CREBBP	1.698	1.348
							EP300	1.653	0.42
Got2	K	309	VESQLK(1)ILIR	Down	0.626	2.18789e-05	CREBBP	2.089	1.348
							EP300	1.03	0.42
Got2	K	296	VGAFTVVCK(1)DAEEAK	Down	0.54	0.00014661	CREBBP	2.117	1.348
							EP300	1.181	0.42
Got2	K	185	YYDPK(1)TCGFDFSGALEDISK	Down	0.655	0.00107448	EP300	1.081	0.42
Grpel1	K	169	LDPIGAK(1)FDPYEHEALFHTPVEGK	Down	0.689	0.00144516	EP300	0.825	0.42
Grpel1	K	58	TDPPSADK(1)TLLEEK	Down	0.643	0.00104071	CREBBP	2.177	1.348
							EP300	1.643	0.42
							KAT2B	1.587	1.343
Grpel1	K	215	TLRPALVGVVK(1)DA	Down	0.687	0.0086917	CREBBP	1.484	1.348
							EP300	1.046	0.42
Gsr	K	318	DPNSK(1)GLNLNK	Down	0.735	0.00666171	CREBBP	2.262	1.348
							EP300	1.546	0.42
							KAT2B	2.009	1.343
							KAT5	1.125	0.71
							KAT8	9.2	7.222
Gsr	K	324	GLNLNK(1)VGIQTDEK	Down	0.703	0.00489758	CREBBP	1.46	1.348
							EP300	1.272	0.42
							KAT2B	1.578	1.343
							KAT5	2.375	0.71
Gstk1	K	165	ISTQQVK(1)NK	Down	0.712	1.55999e-05	CREBBP	4.956	1.348
							EP300	1.49	0.42
Gstz1	K	177	FK(1)VDLSPYPTISHINK	Down	0.63	0.00104838	CREBBP	1.448	1.348
							EP300	0.692	0.42
Gtpbp10	K	222	FLK(1)HLER	Down	0.66	0.000114374	CREBBP	3.093	1.348
							EP300	1.407	0.42
H1-0	K	55	YIK(1)SHYK	Down	0.582	0.000362787	CREBBP	3.165	1.348
							EP300	1.621	0.42
							KAT5	1.406	0.71
H1-1	K	66	K(1)SLAAAGYDVEK	Down	0.731	0.000308474	CREBBP	2.157	1.348
							EP300	1.544	0.42
							KAT2B	2.028	1.343
							KAT5	1	0.71
							KAT8	9.9	7.222
H1-1	K	22	SETAPVAQAASTATEKPAAAK(1)K	Up	1.377	0.000184031	CREBBP	4.044	1.348
							EP300	1.365	0.42
							KAT2A	1.449	1.382
							KAT2B	2.202	1.343
H1-3	K	65	K(1)ALAAAGYDVEK	Down	0.716	0.00128753	CREBBP	1.911	1.348
							EP300	1.435	0.42
							KAT2B	1.881	1.343
							KAT5	0.938	0.71
							KAT8	9.9	7.222
H1-3	K	64	SGVSLAALK(1)K	Down	0.762	0.00573833	CREBBP	3.339	1.348
							EP300	1.714	0.42
H2ax	K	134	APAVGK(1)K	Up	1.485	8.75823e-05	CREBBP	4.306	1.348
							EP300	2.778	0.42
							KAT5	2.312	0.71
							KAT8	12	7.222
H2ax	K	37	K(1)GHYAER	Down	0.541	0.0106843	CREBBP	2.923	1.348
							EP300	1.99	0.42
							KAT2B	1.413	1.343
							KAT5	2.219	0.71
							KAT8	11.6	7.222
H2bc4	K	44	ESYSVYVYK(1)VLK	Down	0.76	0.00865508	CREBBP	2.218	1.348
H2bc4	K	109	LLLPGELAK(1)HAVSEGTK	Down	0.754	0.00346857	EP300	1.387	0.42
H2bc4	K	6	PEPAK(1)SAPAPKKGSKK	Up	1.548	0.000676249	CREBBP	3.46	1.348
							EP300	3.843	0.42
							KAT2B	2.248	1.343
							KAT5	1.781	0.71
							KAT8	9.6	7.222
			PEPAKSAPAPK(1)KGSKK				CREBBP	3.206	1.348
							EP300	2.55	0.42
							KAT2A	1.464	1.382
							KAT2B	2.596	1.343
							KAT5	0.75	0.71
			PEPAKSAPAPKK(1)GSKK				CREBBP	4.544	1.348
							EP300	3.669	0.42
							KAT5	1.5	0.71
			PEPAKSAPAPKKGSK(1)K				CREBBP	3.996	1.348
							EP300	3.312	0.42
							KAT2A	2.638	1.382
							KAT2B	1.881	1.343
H2bc4	K	12	SAPAPK(1)KGSKKAVTK	Up	1.99	3.13639e-05	CREBBP	4.194	1.348
							EP300	2.421	0.42
							KAT2B	2.872	1.343
							KAT5	1.812	0.71
			SAPAPKK(1)GSKKAVTK				CREBBP	4.351	1.348
							EP300	3.931	0.42
							KAT2B	1.349	1.343
							KAT5	3.062	0.71
			SAPAPKKGSK(1)KAVTK				CREBBP	2.661	1.348
							EP300	3.204	0.42
							KAT2A	2.203	1.382
							KAT2B	2.55	1.343
			SAPAPKKGSKK(1)AVTK				CREBBP	2.859	1.348
							EP300	2.185	0.42
							KAT2A	2.826	1.382
							KAT2B	2.44	1.343
							KAT5	2.031	0.71
H3-3a	K	15	STGGK(1)APRKQLATKAAR	Up	1.329	0.00112227	CREBBP	4.113	1.348
							EP300	2.552	0.42
							HAT1	16.4	14.143
							KAT2A	4.884	1.382
							KAT2B	2.817	1.343
							KAT5	6.469	0.71
							KAT8	19.6	7.222
			STGGKAPRK(1)QLATKAAR				CREBBP	2.593	1.348
							EP300	3.196	0.42
							KAT2A	2.145	1.382
							KAT2B	2.165	1.343
			STGGKAPRKQLATK(1)AAR				CREBBP	3.089	1.348
							EP300	2.548	0.42
							KAT2A	2.725	1.382
H3-3a	K	28	K(1)SAPSTGGVK(1)K	Up	1.748	5.80443e-05	CREBBP	3.641	1.348
							EP300	1.891	0.42
							KAT2B	2.028	1.343
							KAT5	1.406	0.71
							KAT8	8.6	7.222
			K(1)SAPSTGGVK(1)K				CREBBP	3.778	1.348
							EP300	1.97	0.42
							KAT2A	1.826	1.382
							KAT2B	1.385	1.343
							KAT5	1.594	0.71
							KAT8	9.9	7.222
H3c2	K	28	K(1)SAPATGGVK(1)K	Up	1.765	4.90683e-05	CREBBP	3.641	1.348
							EP300	1.891	0.42
							KAT2B	2.028	1.343
							KAT5	1.406	0.71
							KAT8	8.6	7.222
							CREBBP	3.778	1.348
							EP300	1.97	0.42
							KAT2A	1.826	1.382
							KAT2B	1.385	1.343
							KAT5	1.594	0.71
							KAT8	9.9	7.222
H4c1	K	78	DAVTYTEHAK(1)R	Down	0.732	0.000290625	CREBBP	2.415	1.348
							EP300	1.706	0.42
							KAT8	14.8	7.222
H4c1	K	80	K(1)TVTAMDVVYALK	Down	0.584	0.000162061	CREBBP	1.52	1.348
							EP300	0.613	0.42
							KAT2B	1.725	1.343
							KAT8	9.4	7.222
H4c1	K	92	TVTAMDVVYALK(1)R	Down	0.673	0.000237798	CREBBP	1.992	1.348
							EP300	0.855	0.42
Hadha	K	350	ALMGLYNGQVLCK(1)K	Down	0.668	0.00114007	CREBBP	1.746	1.348
							EP300	0.619	0.42
Hadha	K	644	GFYIYQEGSK(1)NK	Down	0.681	6.55783e-05	CREBBP	2.222	1.348
							EP300	1.474	0.42
							KAT2A	1.609	1.382
Hadha	K	386	GLK(1)TLLK	Down	0.659	0.00180334	CREBBP	2.843	1.348
							EP300	1.79	0.42
							KAT2A	1.449	1.382
							KAT2B	1.45	1.343
							KAT5	2.312	0.71
Hadha	K	60	INSPNSK(1)VNTLNK	Down	0.733	0.000250709	CREBBP	2.569	1.348
							EP300	1.143	0.42
							KAT2B	1.752	1.343
							KAT8	8.9	7.222
Hadha	K	415	K(1)ALTSFER	Down	0.728	0.00724116	CREBBP	2.984	1.348
							EP300	1.907	0.42
							KAT2B	1.881	1.343
							KAT5	1.281	0.71
							KAT8	10.2	7.222
Hadha	K	759	YESAYGTQFTPCQLLLDHANNSSK(1)K	Down	0.653	0.00101587	CREBBP	2.774	1.348
Hadhb	K	278	DTVTK(1)DNGIRPSSLEQMAK	Down	0.67	0.00046458	CREBBP	1.815	1.348
							EP300	0.938	0.42
Hadhb	K	254	SHSLAK(1)K	Down	0.656	0.00613578	CREBBP	4.601	1.348
							EP300	2.28	0.42
							KAT2B	2.183	1.343
							KAT5	1.062	0.71
							KAT8	13.1	7.222
Hadhb	K	409	TK(1)VGSPPLEK	Down	0.697	0.000265113	CREBBP	2.746	1.348
							EP300	2.605	0.42
							KAT5	2.094	0.71
							KAT8	8.6	7.222
Hars2	K	443	AEMLYK(1)NNPK	Down	0.718	0.000133392	CREBBP	3.335	1.348
							EP300	1.768	0.42
							KAT5	0.938	0.71
Hars2	K	256	HEMVAK(1)K	Down	0.673	0.000776872	CREBBP	4.016	1.348
							EP300	1.982	0.42
							KAT2B	1.651	1.343
							KAT8	12.5	7.222
Hdhd3	K	15	LLTWDVK(1)DTLIK	Up	1.535	0.000500596	EP300	0.72	0.42
Hibch	K	376	DVTDEDLNSYFK(1)SLGSSDLK	Down	0.695	0.00859401	CREBBP	1.653	1.348
							EP300	0.694	0.42
							KAT5	1.406	0.71
Hk2	K	418	STIGVDGSVYK(1)K	Down	0.65	0.000372704	CREBBP	2.383	1.348
							EP300	0.754	0.42
							KAT5	1.25	0.71
Hmgb2	K	114	IK(1)IEHPGLSIGDTAK	Down	0.726	0.00137103	CREBBP	2.629	1.348
							EP300	0.514	0.42
Hnrnpa1	K	78	PHK(1)VDGR	Up	1.333	0.00423193	CREBBP	3.242	1.348
							EP300	2.004	0.42
							KAT8	13.2	7.222
Hnrnpc	K	157	AVVPSK(1)R	Up	1.44	0.000636366	CREBBP	3.46	1.348
							EP300	2.435	0.42
Hnrnpf	K	87	YIEVFK(1)SHR	Down	0.733	0.00369502	CREBBP	3.238	1.348
							EP300	1.177	0.42
Hnrnpk	K	405	DLAGSIIGK(1)GGQR	Up	1.397	0.00114473	CREBBP	2.028	1.348
							EP300	1.577	0.42
							KAT2B	1.394	1.343
							KAT5	2.062	0.71
							KAT8	9	7.222
Hnrnpl	K	62	LK(1)TENAGDQHGGGGGGGSGAAGGGGGENYDDPHK	Up	1.534	0.00261106	EP300	0.982	0.42
Hscb	K	118	HFSDK(1)HSTLVNDAYK	Down	0.651	0.00187154	CREBBP	1.819	1.348
							EP300	0.631	0.42
							KAT2B	1.422	1.343
Hsp90ab1	K	491	SIYYITGESK(1)EQVANSAFVER	Down	0.739	0.0100949	EP300	0.599	0.42
Hspa5	K	97	NQLTSNPENTVFDAK(1)R	Up	1.718	0.0023479	CREBBP	2.609	1.348
							EP300	0.79	0.42
Hspa9	K	360	AQFEGIVTDLIK(1)R	Down	0.555	1.58421e-05	CREBBP	1.911	1.348
							EP300	0.96	0.42
Hspa9	K	138	DTK(1)NVPFK	Down	0.744	0.00209989	CREBBP	2.484	1.348
							EP300	1.919	0.42
Hspa9	K	288	HIVK(1)EFK	Down	0.698	0.00116402	CREBBP	2.98	1.348
							EP300	1.395	0.42
							KAT8	12.9	7.222
Hspa9	K	394	MPK(1)VQQTVQDLFGR	Down	0.684	0.000227095	CREBBP	2.472	1.348
							EP300	0.579	0.42
Hspa9	K	234	VINEPTAAALAYGLDK(1)SEDK	Down	0.682	0.000285343	CREBBP	2.569	1.348
							EP300	0.893	0.42
Hspd1	K	249	CEFQDAYVLLSEK(1)K	Down	0.694	0.000934885	CREBBP	2.04	1.348
							EP300	0.919	0.42
Hspd1	K	359	DDAMLLK(1)GK	Down	0.625	0.00875012	CREBBP	3.411	1.348
							EP300	1.192	0.42
							KAT5	1.75	0.71
Hspd1	K	87	SIDLK(1)DK	Down	0.632	0.000234272	CREBBP	4.633	1.348
							EP300	1.425	0.42
Hspd1	K	364	GDK(1)AHIEK	Down	0.711	0.00169082	CREBBP	3.081	1.348
							EP300	1.873	0.42
							KAT2B	2.202	1.343
							KAT5	2.312	0.71
							KAT8	9.3	7.222
Hspd1	K	469	IGIEIIK(1)R	Down	0.738	0.000265191	CREBBP	2.778	1.348
							EP300	1.151	0.42
							KAT2B	1.495	1.343
Hspd1	K	91	YK(1)NIGAKLVQDVANNTNEEAGDGTTTATVLAR	Down	0.623	7.09438e-05	EP300	1.2	0.42
			YKNIGAK(1)LVQDVANNTNEEAGDGTTTATVLAR				EP300	0.696	0.42
							KAT2B	1.963	1.343
							KAT8	8.2	7.222
Hspe1	K	56	GK(1)SGEIEPVSVK	Down	0.712	4.85409e-07	CREBBP	2.649	1.348
							EP300	1.69	0.42
							HAT1	16.333	14.143
							KAT2B	2.083	1.343
							KAT5	3.5	0.71
							KAT8	17.7	7.222
Hspe1	K	8	K(1)FLPLFDR	Down	0.616	0.000270146	CREBBP	1.625	1.348
							EP300	1.276	0.42
							KAT2B	1.404	1.343
Hspe1	K	80	VLLPEYGGTK(1)VVLDDK	Down	0.623	0.000106157	EP300	0.466	0.42
Iars2	K	146	GSK(1)VHFVPGWDCHGLPIETK	Down	0.635	0.00041632	EP300	0.633	0.42
							KAT2B	2.211	1.343
							KAT8	11.5	7.222
Iars2	K	775	ITDSYK(1)QYDFGK	Down	0.681	0.000171813	CREBBP	1.774	1.348
							EP300	1.107	0.42
Ide	K	192	EVNAVDSEHEK(1)NVMNDAWR	Down	0.664	0.00679967	EP300	0.823	0.42
Ide	K	656	MATFEIDK(1)K	Down	0.768	0.0290522	CREBBP	3.46	1.348
							EP300	1.546	0.42
							KAT2B	1.523	1.343
Idh1	K	236	YK(1)SQFEAQK	Up	1.591	0.000123201	CREBBP	3.968	1.348
							EP300	1.881	0.42
							KAT5	1.156	0.71
Idh2	K	272	DIFQEIFDK(1)HYK	Down	0.539	0.000276066	EP300	0.671	0.42
Idh2	K	263	FK(1)DIFQEIFDK	Down	0.604	0.000239783	CREBBP	1.726	1.348
							EP300	0.744	0.42
Idh2	K	45	IK(1)VEKPVVEMDGDEMTR	Down	0.724	0.000381549	CREBBP	3.024	1.348
							EP300	0.635	0.42
							KAT5	1.062	0.71
							KAT8	7.3	7.222
Idh2	K	413	VCVQTVESGAMTK(1)DLAGCIHGLSNVK	Down	0.634	0.00120766	EP300	0.556	0.42
Idh3a	K	223	EVAENCK(1)DIK	Down	0.686	0.00177085	CREBBP	3.145	1.348
							EP300	1.341	0.42
Idh3a	K	336	IEAACFATIK(1)DGK	Down	0.737	0.000717998	CREBBP	1.923	1.348
							EP300	1.016	0.42
Idh3g	K	159	HK(1)DIDILIVR	Down	0.714	0.0263583	CREBBP	1.681	1.348
							EP300	1.058	0.42
							KAT8	14.4	7.222
Idi1	K	169	NVTLNPDPNEIK(1)SYCYVSK	Down	0.695	0.000589414	EP300	0.452	0.42
							KAT5	0.781	0.71
Idi1	K	176	SYCYVSK(1)EEVR	Down	0.665	0.00271464	CREBBP	2.294	1.348
							EP300	1.139	0.42
							KAT2B	1.404	1.343
Igf2r	K	2041	K(1)SATGQVQVLGLVHTQK	Up	1.309	0.0012998	CREBBP	1.641	1.348
							EP300	1.081	0.42
							KAT2B	2.028	1.343
							KAT8	9.7	7.222
Kansl3	K	544	TK(1)VTTVTSTQK	Down	0.695	0.00234416	CREBBP	3.5	1.348
							EP300	1.583	0.42
Kif20b	K	773	STCNETSEMPK(1)NSR	Down	0.74	0.0214769	CREBBP	3.605	1.348
							EP300	1.651	0.42
							KAT5	0.719	0.71
Kif2a	K	101	TVAAVK(1)NDPPPR	Up	1.417	0.003708	CREBBP	2.847	1.348
							EP300	1.675	0.42
Kif4	K	1081	K(1)SIQGCSCK	Up	2.037	0.00315639	CREBBP	2.222	1.348
							EP300	1.877	0.42
							KAT2B	2.028	1.343
							KAT5	1.906	0.71
							KAT8	10.5	7.222
Kmt2a	K	1519	NSYHPECLGPNYPTK(0.246)PTKK	Up	2.326	0.000459301	CREBBP	1.641	1.348
							EP300	1.149	0.42
							KAT2A	1.464	1.382
			NSYHPECLGPNYPTKPTK(0.754)K				CREBBP	2.25	1.348
							EP300	0.75	0.42
L2hgdh	K	105	DLALHQTGHNSGVIHSGIYYK(1)PESLK	Down	0.573	0.00355826	CREBBP	1.359	1.348
Lap3	K	45	DK(1)DDDLPQFTSAGESFNK	Down	0.682	0.00666067	CREBBP	1.468	1.348
							EP300	1.232	0.42
							KAT2B	1.413	1.343
Lap3	K	221	FAEIIEK(1)NLK	Down	0.677	0.00427159	CREBBP	2.548	1.348
							EP300	1.54	0.42
Lars2	K	612	LPSGQCLK(1)K	Down	0.645	0.00011086	CREBBP	2.883	1.348
							EP300	1.161	0.42
Lars2	K	723	TK(1)AQNLWEYK	Down	0.683	0.000578134	CREBBP	2.46	1.348
							EP300	1.548	0.42
							KAT2B	1.578	1.343
							KAT5	0.75	0.71
							KAT8	7.8	7.222
Lig3	K	422	LIK(1)HDLK	Down	0.696	0.000531248	CREBBP	3.206	1.348
							EP300	1.433	0.42
							KAT5	0.875	0.71
Lrpap1	K	309	LK(1)HVESIGDPEHISR	Down	0.635	0.00138512	CREBBP	2.044	1.348
							EP300	0.673	0.42
							KAT8	7.6	7.222
Lrpprc	K	1345	ALYEYLTAK(1)NLK	Down	0.722	0.000821623	CREBBP	1.815	1.348
							EP300	1.058	0.42
Lrpprc	K	849	GDLPAALEASIACHK(1)K	Down	0.749	0.00297577	CREBBP	2.952	1.348
							EP300	0.99	0.42
							KAT8	9.6	7.222
Lrpprc	K	1048	SK(1)DAYNIFLK	Down	0.67	0.00172016	CREBBP	1.452	1.348
							EP300	1.915	0.42
							KAT2B	1.596	1.343
							KAT5	2.281	0.71
							KAT8	8.4	7.222
Lyrm4	K	21	ESK(1)HFSAYNYR	Down	0.652	0.0025577	CREBBP	1.815	1.348
							EP300	1.728	0.42
							KAT2B	1.798	1.343
							KAT8	9.8	7.222
Matr3	K	710	KDPSASATSK(1)K	Up	1.636	1.06986e-06	CREBBP	4.198	1.348
							EP300	3.032	0.42
							KAT2B	1.78	1.343
							KAT5	1.781	0.71
Matr3	K	715	K(0.876)VDKIEELDQENEAALENGIK	Up	1.388	0.00168637	CREBBP	1.891	1.348
							EP300	1.103	0.42
							KAT2B	1.413	1.343
							KAT8	9.4	7.222
			KVDK(0.124)IEELDQENEAALENGIK				CREBBP	2.839	1.348
							EP300	1.155	0.42
							KAT2B	1.587	1.343
Mavs	K	297	LVPVK(1)TMSSK	Up	1.856	6.83992e-05	CREBBP	3.516	1.348
							EP300	1.69	0.42
Mccc1	K	233	K(1)SFNDDAMLIEK	Down	0.687	0.000707791	CREBBP	2.29	1.348
							EP300	1.331	0.42
							KAT2B	2.028	1.343
							KAT8	9.4	7.222
Mcm3	K	556	HDSLLHGTK(1)K	Up	1.507	0.00163122	CREBBP	2.29	1.348
							EP300	1.663	0.42
							KAT8	12.1	7.222
Mdh2	K	78	ANVK(1)GYLGPEQLPDCLK	Down	0.646	0.000930602	EP300	0.55	0.42
Mdh2	K	296	ETECTYFSTPLLLGK(1)K	Down	0.577	0.000280592	CREBBP	2.137	1.348
							EP300	0.819	0.42
Mdh2	K	335	GEDFVK(1)NMK	Down	0.714	0.000297386	CREBBP	3.319	1.348
							EP300	1.466	0.42
							KAT2B	1.45	1.343
Mdh2	K	301	GLEK(1)NLGIGKITPFEEK	Down	0.605	5.61662e-05	CREBBP	1.548	1.348
							EP300	0.829	0.42
			GLEKNLGIGK(1)ITPFEEK				EP300	0.762	0.42
							KAT8	9.4	7.222
Mdh2	K	307	NLGIGK(1)ITPFEEK	Down	0.638	0.00068379	CREBBP	1.976	1.348
							EP300	1.171	0.42
							KAT5	1.219	0.71
							KAT8	10.5	7.222
Mdh2	K	239	IQEAGTEVVK(1)AK	Down	0.743	0.0133412	CREBBP	3.125	1.348
							EP300	0.974	0.42
							KAT2B	1.954	1.343
Mdh2	K	329	K(1)GEDFVK	Down	0.674	0.00175002	CREBBP	3.343	1.348
							EP300	1.611	0.42
							KAT2B	1.413	1.343
							KAT5	1.5	0.71
							KAT8	8.6	7.222
Mdh2	K	157	K(1)HGVYNPNK	Down	0.633	0.000623573	CREBBP	2.081	1.348
							EP300	2.018	0.42
							KAT2B	1.761	1.343
							KAT5	2.5	0.71
							KAT8	11.3	7.222
Mecp2	K	284	KPGSVVAAAAAEAK(1)K	Up	1.352	0.00265679	CREBBP	3.415	1.348
							EP300	1.677	0.42
							KAT8	7.7	7.222
Mecr	K	267	LALNCVGGK(1)SSTELLR	Down	0.765	0.00039077	CREBBP	1.742	1.348
							EP300	1.127	0.42
							KAT2A	1.464	1.382
							KAT5	2.438	0.71
							KAT8	12.7	7.222
Mecr	K	248	MPETK(1)TIFK	Down	0.717	0.000108694	CREBBP	1.948	1.348
							EP300	1.573	0.42
							KAT2B	2.055	1.343
							KAT5	1.094	0.71
Men1	K	517	K(1)TSGTVPGTTR	Up	1.391	0.00669022	CREBBP	2.778	1.348
							EP300	1.47	0.42
							KAT2B	1.725	1.343
							KAT8	8.5	7.222
Mgme1	K	250	LCVIDWK(1)TSEK	Down	0.678	0.000232416	CREBBP	2.875	1.348
							EP300	1.058	0.42
Mipep	K	85	K(1)TEWLVER	Down	0.749	0.00631969	CREBBP	2.044	1.348
							EP300	1.252	0.42
							KAT2B	1.725	1.343
							KAT5	1.156	0.71
							KAT8	7.4	7.222
Mki67	K	114	YEDGNHEDGSKPTEFPGK(1)SLGK	Up	1.443	0.000735373	CREBBP	2.226	1.348
							EP300	1	0.42
							KAT2A	1.58	1.382
Mms22l	K	1065	K(1)HTVHAIR	Up	1.653	0.00560332	CREBBP	2.173	1.348
							EP300	1.8	0.42
							KAT2B	1.761	1.343
							KAT5	1.188	0.71
							KAT8	10.2	7.222
Mpv17	K	82	VLDHLIPGTTK(1)VHALK	Down	0.659	0.0032551	EP300	0.762	0.42
							KAT8	9.8	7.222
Mrpl1	K	64	EK(1)TSDEKPVDDIEK	Down	0.702	0.00128671	CREBBP	4.202	1.348
							EP300	1.54	0.42
							KAT2B	2.092	1.343
Mrpl12	K	153	EIK(1)NYVQGINLVQAK	Down	0.646	0.00133764	CREBBP	1.569	1.348
Mrpl12	K	165	NYVQGINLVQAK(1)K	Down	0.728	0.000107537	CREBBP	2.036	1.348
							EP300	0.788	0.42
Mrpl37	K	127	TK(1)LIEGLPK	Down	0.603	0.00269713	CREBBP	2.331	1.348
							EP300	1.224	0.42
							KAT5	0.75	0.71
Mrpl38	K	305	TFDFYK(1)R	Down	0.639	0.00273006	CREBBP	2.71	1.348
							EP300	1.482	0.42
Mrpl39	K	156	AFK(1)DDYVVSLVR	Down	0.729	0.000201946	CREBBP	2.286	1.348
							EP300	0.532	0.42
Mrpl41	K	103	DFK(1)EGTFDANNLEK	Down	0.735	0.00180024	CREBBP	2.028	1.348
							EP300	1.321	0.42
							KAT5	0.75	0.71
Mrpl44	K	99	TAFINSCYIK(1)SEEAK	Down	0.705	0.00285343	CREBBP	2.214	1.348
							EP300	0.681	0.42
Mrpl46	K	246	ALLLTGDFVQAGK(1)K	Down	0.699	0.00856989	CREBBP	1.835	1.348
							EP300	1.169	0.42
							KAT8	9	7.222
Mrps17	K	78	HVK(1)HELAEIIFK	Down	0.668	0.00106086	CREBBP	2.464	1.348
							EP300	0.625	0.42
							KAT8	12.1	7.222
Mrps18b	K	110	DHK(1)LHVDFR	Down	0.668	0.00844109	CREBBP	1.746	1.348
							EP300	0.833	0.42
							KAT8	17.1	7.222
Mrps22	K	215	DENLK(1)TMYSQDR	Down	0.679	0.000641698	CREBBP	2.681	1.348
							EP300	1.196	0.42
Mrps26	K	185	IEEALDSPK(1)SYNWAVTK	Down	0.754	0.00636767	EP300	1.298	0.42
Mrps26	K	193	SYNWAVTK(1)EGQVVR	Down	0.759	0.00375031	CREBBP	1.605	1.348
							EP300	0.659	0.42
Mtatp8	K	48	VK(1)TPWELK	Down	0.579	0.00146677	CREBBP	2.129	1.348
							EP300	1.304	0.42
							KAT5	1.344	0.71
Mterf3	K	181	LDFEK(1)HIK	Down	0.61	0.000575675	CREBBP	2.351	1.348
							EP300	1.294	0.42
Mthfd1l	K	595	ITIGQGSTEK(1)GYSR	Down	0.704	0.0368848	CREBBP	1.484	1.348
							EP300	1.228	0.42
							KAT2B	1.569	1.343
Mthfd2	K	299	LVGDVDFEGVK(1)K	Down	0.66	0.000178914	CREBBP	1.685	1.348
							EP300	1.01	0.42
							KAT5	0.875	0.71
Mtres1	K	133	DYK(1)DLEK	Down	0.66	0.00442186	CREBBP	3.552	1.348
							EP300	1.675	0.42
							KAT5	1.281	0.71
Mtres1	K	149	YDVILK(1)TGLDVGR	Down	0.753	0.000750618	CREBBP	1.375	1.348
							EP300	0.69	0.42
Mtrex	K	76	DLDVEGTDEPIFGK(1)K	Up	1.35	9.71888e-05	CREBBP	1.984	1.348
							EP300	1.073	0.42
Myo1e	K	17	YHWQSHNVK(1)HSGVDDMVLLSK	Up	1.32	0.00134978	KAT8	15.2	7.222
Nadk2	K	314	QK(1)SSGLNLCTGTGSK	Down	0.629	0.000935483	CREBBP	2.181	1.348
							EP300	1.48	0.42
							KAT2B	2.037	1.343
Nans	K	79	HSWGK(1)TYGEHK	Up	1.536	0.00485406	CREBBP	1.891	1.348
							EP300	1.296	0.42
							KAT5	1.688	0.71
							KAT8	12.8	7.222
Nasp	K	162	K(0.017)AEGKSLTKPETDK	Up	1.371	6.27572e-05	CREBBP	3.948	1.348
							EP300	2.851	0.42
							KAT2B	1.881	1.343
							KAT5	3.094	0.71
							KAT8	8.6	7.222
			KAEGK(0.983)SLTKPETDK				CREBBP	3.79	1.348
							EP300	2.597	0.42
							HAT1	16.4	14.143
							KAT2B	1.459	1.343
							KAT5	3.219	0.71
							KAT8	15.2	7.222
Nasp	K	241	GK(1)SISGAYVQNK	Up	1.314	0.00124114	CREBBP	2.569	1.348
							EP300	1.625	0.42
							HAT1	16.333	14.143
							KAT2B	2.083	1.343
							KAT5	3.094	0.71
							KAT8	15.2	7.222
Naxd	K	63	NIVPALTSK(1)K	Down	0.642	0.00479928	CREBBP	2.258	1.348
							EP300	1.625	0.42
Naxe	K	263	FVPPALEK(1)K	Down	0.738	2.08022e-05	CREBBP	2.125	1.348
							EP300	1.893	0.42
Ndufa10	K	122	FYDDPK(1)SNDGNSYR	Down	0.605	0.00440577	CREBBP	1.488	1.348
							EP300	1.246	0.42
Ndufa5	K	36	TLDILK(1)HFPK	Down	0.553	6.86764e-06	CREBBP	1.839	1.348
							EP300	1.272	0.42
Ndufb3	K	40	IEGTPLETVQK(1)K	Down	0.636	0.000754623	CREBBP	2.387	1.348
							EP300	1.28	0.42
Ndufs6	K	100	ETK(1)TGTCGYCGLQFK	Down	0.746	0.00654258	EP300	1.119	0.42
							KAT2B	1.45	1.343
							KAT8	8.2	7.222
Nedd8	K	6	VK(1)TLTGK	Down	0.662	0.000214828	CREBBP	3.468	1.348
							EP300	1.657	0.42
							KAT5	0.75	0.71
							KAT8	8.4	7.222
Nfix	K	276	SITSPPSTSSTK(1)R	Down	0.731	0.00407246	CREBBP	2.919	1.348
							EP300	1.954	0.42
Nifk	K	196	PK(1)NIAVAHR	Up	1.368	0.000387383	CREBBP	2.524	1.348
							EP300	1.808	0.42
							KAT2B	1.385	1.343
							KAT5	0.875	0.71
Nipsnap1	K	80	IQFHNVK(1)PECLDAYNSLTEAVLPK	Down	0.658	0.000519051	EP300	0.438	0.42
							KAT8	9.7	7.222
Nipsnap1	K	146	NNK(1)EYLEFR	Down	0.734	6.93171e-06	CREBBP	2.101	1.348
							EP300	1.47	0.42
							KAT2B	1.541	1.343
							KAT5	0.938	0.71
Nipsnap2	K	77	LQFHNVK(1)PECLDAYNK	Down	0.724	0.00145513	EP300	0.484	0.42
							KAT8	10.5	7.222
Nipsnap2	K	86	LQFHNVKPECLDAYNK(1)ICQEVLPK	Down	0.589	0.00063041	KAT8	10.5	7.222
Nipsnap3b	K	48	PSK(1)TNEFLENFK	Down	0.552	0.000516566	CREBBP	3.04	1.348
							EP300	1.345	0.42
							KAT2B	1.615	1.343
							KAT8	8.7	7.222
Nktr	K	942	AKPPAKPPTSTFLPGSDGAWK(1)SR	Up	1.353	0.00930843	CREBBP	2.129	1.348
							EP300	0.839	0.42
Nktr	K	983	DDLKGDHTK(1)R	Up	1.452	0.0263721	CREBBP	2.673	1.348
							EP300	1.429	0.42
							KAT2B	2.165	1.343
							KAT8	10.2	7.222
Nktr	K	1216	SQMNLTDK(1)WK	Up	1.331	5.31127e-05	CREBBP	3.274	1.348
							EP300	1.169	0.42
							KAT5	1.375	0.71
Nnt	K	403	AISPDK(1)DNFHFEVK	Down	0.75	0.00312432	EP300	1.056	0.42
Nnt	K	70	EIFQNEK(1)R	Down	0.712	0.00191471	CREBBP	3.153	1.348
							EP300	1.774	0.42
Nnt	K	1071	K(1)TCDALQAK	Down	0.721	0.00129514	CREBBP	1.706	1.348
							EP300	1.855	0.42
							KAT2B	1.725	1.343
							KAT5	1.844	0.71
							KAT8	7.8	7.222
Nolc1	K	123	ASVPQHAGK(1)AAAK	Down	0.701	0.00487754	CREBBP	2.887	1.348
							EP300	2.502	0.42
							KAT2A	2.362	1.382
							KAT2B	1.743	1.343
							KAT5	3.375	0.71
							KAT8	18.8	7.222
Nolc1	K	547	IQASK(1)ANGTPASLNGK	Up	1.508	0.00925527	CREBBP	3.101	1.348
							EP300	1.633	0.42
							KAT2B	1.523	1.343
Nop2	K	467	TNKDEK(1)DIQR	Down	0.768	0.00427608	CREBBP	3.028	1.348
							EP300	1.599	0.42
							KAT2B	2.018	1.343
Nop56	K	524	EELASDLEEMATSSAK(1)R	Up	1.701	0.0044515	CREBBP	3.758	1.348
							EP300	1.488	0.42
							KAT8	8.7	7.222
Nop56	K	134	LHFHNLVK(1)GLTDLSACK	Down	0.666	0.00967891	CREBBP	1.496	1.348
Nop58	K	426	SEVK(1)TYDPSGDSTLPTCSK	Down	0.737	0.00785138	EP300	1.103	0.42
Nop58	K	441	TYDPSGDSTLPTCSK(1)K	Up	1.33	0.000377186	CREBBP	2.786	1.348
							EP300	1.427	0.42
Npm3	K	169	LCGILPAK(1)K	Up	1.363	1.6282e-05	CREBBP	2.044	1.348
							EP300	1.631	0.42
Nsdhl	K	179	AVLDANDPK(1)K	Up	1.736	9.16863e-05	CREBBP	2.613	1.348
							EP300	1.5	0.42
							KAT5	2.125	0.71
Nudt9	K	205	K(1)DCGEWAIPGGMVDPGEK	Down	0.744	0.00296498	EP300	0.827	0.42
							KAT2B	1.376	1.343
Nudt9	K	74	TSPYPGSK(1)VER	Up	1.715	0.00031962	CREBBP	3.028	1.348
							EP300	1.766	0.42
							KAT2A	2.014	1.382
							KAT2B	2.119	1.343
							KAT8	7.3	7.222
Nup50	K	8	VAEK(1)ELTDR	Down	0.661	0.00448799	CREBBP	3.044	1.348
							EP300	1.786	0.42
							KAT2B	1.44	1.343
Nup98	K	1018	FGHIPSK(1)GETVQEICSPR	Up	1.426	0.00629454	CREBBP	1.927	1.348
Nup98	K	603	LVLK(1)NLNNSNLFSPVNHDSEDLASPSEYPENGER	Down	0.698	0.0127455	EP300	0.52	0.42
Nxf1	K	429	K(1)NLAEYVK	Up	1.385	0.0013188	CREBBP	2.722	1.348
							EP300	1.849	0.42
							KAT2B	1.771	1.343
							KAT5	1.25	0.71
							KAT8	9.4	7.222
Oat	K	386	ETK(1)DCDAWK	Down	0.724	0.00446793	CREBBP	1.508	1.348
							EP300	1.105	0.42
Ogdh	K	697	HHVLHDQNVDK(1)R	Down	0.744	0.0472464	CREBBP	2.121	1.348
							EP300	0.935	0.42
							KAT5	1.5	0.71
Ogdh	K	276	KWSSEK(1)R	Down	0.58	0.000106433	CREBBP	4.278	1.348
							EP300	2.085	0.42
							KAT2B	3.633	1.343
Ogdh	K	561	YAELLVSQGVVNQPEYEEEISK(1)YDK	Down	0.753	0.00042126	CREBBP	3.02	1.348
Otud4	K	342	NLKPPPPESWNTVSGK(1)K	Up	1.415	0.00222692	CREBBP	2.565	1.348
							EP300	1.026	0.42
							KAT2A	1.507	1.382
Oxsm	K	138	DSGWHPK(1)R	Down	0.544	0.00555411	CREBBP	2.69	1.348
							EP300	1.373	0.42
Pam16	K	82	NYEHLFK(1)VNDK	Down	0.622	0.00102437	CREBBP	2.44	1.348
							EP300	1.02	0.42
Parp2	K	36	ATEDDSPPGK(1)K	Up	1.304	0.00338138	CREBBP	3.109	1.348
							EP300	2.286	0.42
							KAT2B	2.358	1.343
							KAT5	3.625	0.71
							KAT8	8.7	7.222
Parp2	K	51	GPMAGGK(1)DADR	Down	0.768	0.00654042	CREBBP	2.21	1.348
							EP300	2.448	0.42
							KAT2A	1.754	1.382
							KAT2B	1.89	1.343
							KAT5	0.875	0.71
							KAT8	10.3	7.222
Pc	K	316	QVGYENAGTVEFLVDK(1)HGK	Down	0.596	0.000780201	CREBBP	1.911	1.348
							EP300	0.435	0.42
Pcbd2	K	124	DVK(1)LAQFIEK	Down	0.661	0.00162751	CREBBP	2.488	1.348
							EP300	0.948	0.42
							KAT8	8.1	7.222
Pcca	K	184	AK(1)VNTIPGFDGVVK	Down	0.708	0.000643885	EP300	0.913	0.42
							KAT2B	1.358	1.343
							KAT8	12.9	7.222
Pccb	K	476	GAVEIIFK(1)GHQDVEAAQAEYVEK	Down	0.674	0.00396	CREBBP	1.472	1.348
							EP300	0.5	0.42
							KAT5	1.281	0.71
Pccb	K	62	IDAQHK(1)R	Down	0.631	0.0294924	CREBBP	3.815	1.348
							EP300	1.94	0.42
							KAT5	1.25	0.71
							KAT8	15	7.222
Pdia3	K	271	DLLTAYYDVDYEK(1)NAK	Down	0.655	0.00147657	EP300	0.714	0.42
							KAT5	1	0.71
Pdk1	K	212	K(1)HIGSINPNCDVVEVIK	Down	0.688	0.0484233	CREBBP	1.395	1.348
							EP300	0.933	0.42
							KAT2B	1.761	1.343
							KAT8	9.4	7.222
Pdk3	K	264	ATVELHEDK(0.153)KEGYPAVK	Down	0.682	0.000349429	CREBBP	1.69	1.348
							EP300	1.135	0.42
							KAT2B	1.606	1.343
							KAT8	7.7	7.222
			ATVELHEDKK(0.847)EGYPAVK				EP300	1.071	0.42
							KAT5	1.031	0.71
Pdk3	K	134	HNDVVPTMAQGVIEYK(1)EK	Down	0.724	0.00769449	CREBBP	2.669	1.348
Pdk3	K	278	TLVTLGK(1)EDLSIK	Down	0.512	0.000212569	CREBBP	2.141	1.348
							EP300	1.234	0.42
							KAT5	1.344	0.71
							KAT8	9.4	7.222
Pgk1	K	291	ITLPVDFVTADK(1)FDENAK	Down	0.702	0.0405226	CREBBP	1.415	1.348
							EP300	0.677	0.42
Pgk1	K	30	VDFNVPMK(1)NNQITNNQR	Down	0.669	0.000184207	CREBBP	1.802	1.348
							EP300	0.77	0.42
Pgk1	K	388	WNTEDK(1)VSHVSTGGGASLELLEGK	Down	0.744	0.00245938	EP300	1.137	0.42
Phip	K	1571	ALSTLSSPDPLTFSHATK(1)NNSAK	Down	0.75	0.0110759	CREBBP	1.911	1.348
							EP300	0.692	0.42
							KAT8	10.4	7.222
Phip	K	1399	AYTPSK(1)R	Up	1.585	0.00118367	CREBBP	3.637	1.348
							EP300	2.861	0.42
							KAT2B	1.624	1.343
							KAT5	0.75	0.71
							KAT8	8.8	7.222
Phrf1	K	820	ETPFPLFSIK(1)K	Down	0.732	0.00877333	CREBBP	2.194	1.348
							EP300	1.357	0.42
Pi4ka	K	610	LYISQESDK(1)DAHLIPDHTIR	Up	1.579	0.00426353	EP300	0.558	0.42
Pitrm1	K	550	GLELQTQQSK(1)HQDASCLPALK	Down	0.699	3.7849e-05	CREBBP	1.96	1.348
							EP300	0.808	0.42
							KAT8	7.4	7.222
Pitrm1	K	770	K(1)YLLNCDNMR	Down	0.764	0.00091458	CREBBP	1.81	1.348
							EP300	0.873	0.42
							KAT2B	1.587	1.343
							KAT5	1.219	0.71
							KAT8	7.4	7.222
Pitrm1	K	509	LTLSMKPDDK(1)YYEK	Down	0.667	0.000990546	CREBBP	1.669	1.348
							EP300	1.234	0.42
							KAT5	0.906	0.71
Pitrm1	K	1012	YLGIGK(1)STHGLAILGPENSK	Down	0.498	0.00167801	CREBBP	1.407	1.348
							EP300	0.669	0.42
							HAT1	15.533	14.143
							KAT5	0.938	0.71
							KAT8	14.2	7.222
Pkn2	K	77	K(1)NLAYVDNILK	Up	1.528	0.000271731	CREBBP	2.02	1.348
							EP300	0.673	0.42
							KAT2B	1.771	1.343
							KAT8	9.4	7.222
Pmpca	K	472	NVK(1)PEDIK	Down	0.678	0.00326003	CREBBP	3.669	1.348
							EP300	1.23	0.42
Pmpca	K	477	NVKPEDIK(1)R	Down	0.549	8.06318e-05	CREBBP	3.887	1.348
							EP300	1.742	0.42
							KAT2B	2.339	1.343
Pnpt1	K	629	FVGPGGYHLK(1)K	Down	0.579	0.000204359	CREBBP	1.746	1.348
							EP300	0.754	0.42
Pnpt1	K	89	TK(1)ASPSQFMPLVVDYR	Down	0.696	0.00599187	CREBBP	1.718	1.348
							EP300	1.371	0.42
							KAT2B	1.578	1.343
							KAT5	0.75	0.71
Poldip2	K	129	GK(1)THTYYQVLIDAR	Down	0.75	0.0055478	CREBBP	1.738	1.348
							EP300	0.683	0.42
							HAT1	15.333	14.143
							KAT2B	2	1.343
							KAT5	1.469	0.71
							KAT8	17.9	7.222
Ppa2	K	152	DK(1)STDCCGDNDPIDVCEIGSK	Down	0.621	0.000231002	EP300	0.972	0.42
							KAT2B	1.716	1.343
Ppa2	K	254	FAFNGEFK(1)NK	Down	0.707	0.00119432	CREBBP	2.677	1.348
							EP300	1.375	0.42
							KAT5	1.438	0.71
Ppa2	K	256	NK(1)AFALDVINSAHER	Down	0.768	0.0164983	CREBBP	1.415	1.348
							EP300	1.298	0.42
							KAT2B	1.633	1.343
Ppif	K	189	KIESFGSK(1)SGK	Down	0.628	0.000325991	CREBBP	3.762	1.348
							EP300	2.373	0.42
							KAT2A	2.435	1.382
							KAT2B	2.183	1.343
							KAT5	2.219	0.71
							KAT8	11.1	7.222
Ppif	K	166	TDWLDGK(1)HVVFGHVK	Down	0.702	0.00824625	EP300	0.502	0.42
							KAT5	2	0.71
							KAT8	10.8	7.222
Ppp1ca	K	238	FLHK(1)HDLDLICR	Down	0.46	0.00572873	CREBBP	1.423	1.348
							EP300	0.768	0.42
							KAT8	12.1	7.222
Prdx3	K	92	ELSLDDFK(1)GK	Down	0.704	0.000997355	CREBBP	3.177	1.348
							EP300	1.127	0.42
Prkcd	K	275	EK(1)VANLCGINQK	Up	1.536	0.00126662	CREBBP	1.694	1.348
							EP300	1.103	0.42
							KAT2B	1.679	1.343
Prkcsh	K	166	LLELQAGK(1)K	Down	0.593	0.00140514	CREBBP	2.819	1.348
							EP300	1.776	0.42
							KAT2B	1.606	1.343
							KAT5	1.188	0.71
							KAT8	10	7.222
Prkdc	K	3260	LLK(0.999)EMHKESKTR	Down	0.747	0.00490465	CREBBP	4.298	1.348
							EP300	1.772	0.42
							KAT5	0.719	0.71
			LLKEMHK(0.001)ESKTR				CREBBP	4.758	1.348
							EP300	2.093	0.42
							KAT8	13.3	7.222
			LLKEMHKESK(0.001)TR				CREBBP	3.778	1.348
							EP300	1.75	0.42
							KAT5	1.781	0.71
Psmd1	K	803	VQYK(0.794)SNCKPSTFAYPAPLEVPK	Up	1.512	0.0313019	CREBBP	1.589	1.348
							EP300	1.224	0.42
			VQYKSNCK(0.206)PSTFAYPAPLEVPK				CREBBP	1.367	1.348
							EP300	0.736	0.42
Psmd6	K	117	AEYLCQIGDK(1)EGALTAFR	Down	0.752	3.26961e-05	EP300	1.008	0.42
Ptcd2	K	85	LILK(1)EELK	Down	0.716	0.000501274	CREBBP	3.774	1.348
							EP300	1.458	0.42
Rbbp6	K	1208	IASSTTPAK(1)K	Up	1.49	0.000288649	CREBBP	3.698	1.348
							EP300	2.609	0.42
							KAT2B	1.743	1.343
							KAT5	1.25	0.71
							KAT8	10.4	7.222
Rbbp6	K	1127	SEK(0.001)PASKDEK	Up	1.477	0.00139484	CREBBP	4.944	1.348
							EP300	2.637	0.42
							KAT2A	1.609	1.382
							KAT2B	1.844	1.343
							KAT5	1.312	0.71
			SEKPASK(0.999)DEK				CREBBP	5.702	1.348
							EP300	2.917	0.42
							KAT2A	2.594	1.382
							KAT2B	3.67	1.343
							KAT8	9	7.222
Rbm10	K	653	TAQQIAK(1)DMER	Up	1.401	0.00377846	CREBBP	3.121	1.348
							EP300	1.774	0.42
							KAT8	9.4	7.222
Rbm26	K	714	AAQK(1)TLSVSTPAVDNNEAQK	Up	1.398	0.0143421	CREBBP	2.698	1.348
							EP300	1.361	0.42
							KAT2B	1.661	1.343
Rbm28	K	463	FELLK(1)HQK	Down	0.751	0.00139752	CREBBP	4.339	1.348
							EP300	1.407	0.42
Rida	K	60	QALK(1)NLGEILK	Down	0.626	0.000263515	CREBBP	2.835	1.348
							EP300	1.202	0.42
							KAT2B	1.661	1.343
Rpl10a	K	152	VDEVK(1)STIK	Down	0.75	0.00190297	CREBBP	2.633	1.348
							EP300	1.51	0.42
							KAT5	0.844	0.71
Rpl3	K	349	K(1)SLLVQTK	Down	0.672	9.8549e-06	CREBBP	2.915	1.348
							EP300	1.774	0.42
							KAT2B	2.028	1.343
							KAT5	1.094	0.71
							KAT8	9.4	7.222
Rps12	K	116	DYGK(1)ESQAK	Down	0.603	0.00184715	CREBBP	4.516	1.348
							EP300	2.308	0.42
							KAT5	1.844	0.71
							KAT8	10.6	7.222
Rps15	K	77	EAPPMEKPEVVK(1)THLR	Down	0.745	0.000980881	CREBBP	1.851	1.348
							EP300	0.97	0.42
Rps24	K	37	ATVPK(1)TEIR	Down	0.505	9.8334e-06	CREBBP	3.008	1.348
							EP300	1.585	0.42
Rps3a	K	27	VVDPFSK(1)K	Down	0.731	0.00258244	CREBBP	2.891	1.348
							EP300	1.74	0.42
Rps4x	K	71	FIK(1)IDGK	Down	0.731	0.000169281	CREBBP	3.226	1.348
							EP300	1.371	0.42
Rps4x	K	106	LIYDTK(1)GR	Down	0.728	0.00123633	CREBBP	2.605	1.348
							EP300	1.373	0.42
Rps9	K	155	LDSQK(1)HIDFSLR	Down	0.727	0.000380996	CREBBP	1.431	1.348
							EP300	0.978	0.42
							KAT2B	1.358	1.343
Rrbp1	K	890	TGVIQDTWHK(1)ATQK	Down	0.719	0.00276001	CREBBP	1.722	1.348
							EP300	0.887	0.42
							KAT8	14.8	7.222
Rtf1	K	517	APPNYAMK(1)K	Up	1.338	0.00307037	CREBBP	3.165	1.348
							EP300	1.772	0.42
							KAT2B	1.367	1.343
Safb	K	629	SVVSFDK(1)VK	Up	1.468	0.000233723	CREBBP	3.363	1.348
							EP300	1.117	0.42
Safb	K	590	TVVMDK(1)SK	Up	1.329	0.000565558	CREBBP	4.746	1.348
							EP300	1.488	0.42
Sars2	K	110	SLEAEK(1)EAVAEAVR	Down	0.741	0.00342373	CREBBP	2.101	1.348
							EP300	2.04	0.42
							KAT2B	2.358	1.343
Scpep1	K	275	NTDGVNFYNILTK(1)SSPEK	Down	0.525	5.27954e-05	CREBBP	2.097	1.348
							EP300	1.034	0.42
Sdha	K	250	AK(1)NTVIATGGYGR	Down	0.633	2.39462e-05	CREBBP	1.754	1.348
							EP300	1.774	0.42
							KAT2B	1.642	1.343
							KAT8	13.2	7.222
Sdha	K	633	HTLSYVDIK(1)TGK	Down	0.739	0.000747022	CREBBP	2.302	1.348
							EP300	0.978	0.42
Sdha	K	547	ISQLYGDLK(1)HLK	Down	0.664	0.000304829	CREBBP	2.113	1.348
							EP300	0.857	0.42
Sdha	K	615	VDEYDYSKPIQGQQK(1)K	Down	0.643	0.00045181	CREBBP	3.056	1.348
							EP300	1.036	0.42
							KAT5	0.875	0.71
Sf3b3	K	109	IHQETFGK(1)SGCR	Up	1.433	0.00110257	EP300	1.542	0.42
							KAT2B	1.661	1.343
							KAT5	1.156	0.71
							KAT8	10.8	7.222
Sfpq	K	695	GREEYEGPNK(1)K	Up	1.643	0.00032384	CREBBP	2.75	1.348
							EP300	1.817	0.42
							KAT5	1.125	0.71
Shmt2	K	469	LQDFK(1)SFLLK	Down	0.677	3.9306e-05	CREBBP	1.56	1.348
							EP300	1.167	0.42
Shmt2	K	302	TVDPK(1)TGK	Down	0.75	0.00122282	CREBBP	3.698	1.348
							EP300	1.911	0.42
							KAT5	1.375	0.71
Slc25a1	K	268	ILK(1)NEGPK	Down	0.732	0.00223957	CREBBP	4.371	1.348
							EP300	1.603	0.42
Slc25a11	K	62	EYK(1)TSFHALTSILK	Down	0.725	0.00294056	CREBBP	1.96	1.348
							EP300	1.506	0.42
							KAT5	0.875	0.71
Slc25a11	K	73	TSFHALTSILK(1)TEGLK	Down	0.691	0.00772632	CREBBP	2	1.348
							EP300	0.698	0.42
Slc25a11	K	256	MIDGK(1)PEYK	Down	0.7	0.01504	CREBBP	2.782	1.348
							EP300	1.49	0.42
							KAT5	2.062	0.71
							KAT8	9.2	7.222
Slc25a24	K	334	ILK(1)HEGFGAFYK	Down	0.616	0.00146194	CREBBP	2.403	1.348
							EP300	0.651	0.42
Slc25a24	K	435	IVSK(1)EGVSGLYR	Down	0.705	0.000118623	CREBBP	1.508	1.348
							EP300	1.736	0.42
Slc25a24	K	318	LAVAK(1)TGQYSGIYGCAK	Down	0.688	0.00195214	CREBBP	1.472	1.348
							EP300	0.748	0.42
							KAT8	12.5	7.222
Slc25a3	K	290	EK(1)GSTASQVLQR	Down	0.559	0.000891897	CREBBP	4.19	1.348
							EP300	1.397	0.42
							KAT2B	1.752	1.343
							KAT5	0.875	0.71
Slc25a4	K	263	IAK(1)DEGANAFFK	Down	0.73	0.0193909	CREBBP	3.286	1.348
							EP300	1.04	0.42
							KAT8	9.6	7.222
Slc25a4	K	166	IFK(1)SDGLK	Down	0.731	0.000476722	CREBBP	3.613	1.348
							EP300	1.633	0.42
Slc25a4	K	147	LAADVGK(1)GSSQR	Down	0.725	0.00936859	CREBBP	3.347	1.348
							EP300	1.978	0.42
							KAT5	3.25	0.71
							KAT8	10.4	7.222
Slc25a5	K	268	DEGSK(1)AFFK	Down	0.723	0.0265671	CREBBP	1.968	1.348
							EP300	2.109	0.42
							KAT2A	1.725	1.382
							KAT2B	2.266	1.343
							KAT5	3.031	0.71
							KAT8	7.3	7.222
Slc25a5	K	23	DFLAGGVAAAISK(1)TAVAPIER	Down	0.702	0.0012119	EP300	1.327	0.42
Slc25a5	K	155	EFK(1)GLGDCLVK	Down	0.617	0.000128109	CREBBP	1.766	1.348
							EP300	1.141	0.42
							KAT5	1.688	0.71
Slc25a5	K	163	GLGDCLVK(1)IYK	Down	0.623	0.00134548	CREBBP	1.544	1.348
							EP300	0.615	0.42
Sltm	K	800	FVGQSEGK(1)K	Up	1.519	0.000616806	CREBBP	2.685	1.348
							EP300	1.871	0.42
							KAT2B	1.817	1.343
							KAT5	1.812	0.71
							KAT8	14.4	7.222
Smchd1	K	1988	IEVTECPIPTK(1)R	Up	1.445	0.00195982	CREBBP	1.665	1.348
							EP300	1.667	0.42
Smchd1	K	1799	NGK(1)LHFK	Up	1.455	0.00231391	CREBBP	2.698	1.348
							EP300	1.744	0.42
							KAT2A	1.652	1.382
							KAT2B	1.505	1.343
							KAT5	4.156	0.71
							KAT8	15.8	7.222
Snrpb2	K	122	TMEQAAAAANK(1)K	Up	1.337	0.00110491	CREBBP	4.23	1.348
							EP300	2.119	0.42
Sod2	K	130	DFGSFEK(1)FK	Down	0.64	2.11352e-05	CREBBP	2.444	1.348
							EP300	1.161	0.42
Srsf10	K	214	TDSK(1)THYK	Up	1.517	0.00660363	CREBBP	2.923	1.348
							EP300	1.931	0.42
							KAT2B	1.615	1.343
							KAT5	2.531	0.71
							KAT8	12.1	7.222
Srsf10	K	218	THYK(1)SGSR	Up	1.727	0.00185468	CREBBP	3.996	1.348
							EP300	2.206	0.42
							KAT5	0.812	0.71
							KAT8	11.1	7.222
Ssb	K	404	DREEPASK(1)HK	Up	1.559	0.0001733	CREBBP	3.935	1.348
							EP300	2.238	0.42
							KAT2A	1.58	1.382
							KAT2B	3.138	1.343
							KAT8	7.8	7.222
Ssbp1	K	103	DVAYQYVK(1)K	Down	0.602	0.000408247	CREBBP	2.823	1.348
							EP300	1.244	0.42
Ssbp1	K	113	IFVEGK(1)VDYGEYMDK	Down	0.745	2.90422e-05	CREBBP	1.415	1.348
							EP300	0.534	0.42
							KAT5	1.188	0.71
							KAT8	9.2	7.222
Stag1	K	453	HDPQAEEALAK(1)R	Up	1.59	0.00177797	CREBBP	2.944	1.348
							EP300	1.905	0.42
							KAT2B	2.229	1.343
							KAT8	11.6	7.222
Stag2	K	55	GK(1)SGNGGGKPPSGSNR	Down	0.666	0.000769342	CREBBP	2.044	1.348
							EP300	2.085	0.42
							HAT1	16.333	14.143
							KAT2B	2.083	1.343
							KAT5	3.594	0.71
							KAT8	17.9	7.222
Sub1	K	5	SK(1)ELVSSSSSGSDSDSEVEK	Down	0.593	0.00672105	CREBBP	2.887	1.348
							EP300	2.343	0.42
							KAT2B	2.138	1.343
							KAT5	0.812	0.71
							KAT8	8.1	7.222
Sucla2	K	215	EPIDIVEGIK(1)K	Down	0.74	0.00152523	CREBBP	2.032	1.348
							EP300	1.272	0.42
Sucla2	K	88	SSDEAYAIAK(1)K	Down	0.743	0.000695058	CREBBP	2.964	1.348
							EP300	1.831	0.42
Sucla2	K	143	LITK(1)QTGEK	Down	0.751	0.00244119	CREBBP	3.839	1.348
							EP300	2.008	0.42
Suclg1	K	94	GGQK(1)HLGLPVFNTVK	Down	0.761	0.00513694	EP300	1.153	0.42
							KAT2B	1.835	1.343
							KAT5	0.875	0.71
							KAT8	11	7.222
Suclg1	K	66	IICQGFTGK(1)QGTFHSQQALEYGTK	Down	0.748	0.00326909	EP300	0.76	0.42
							KAT2B	2	1.343
Suclg1	K	57	NTK(1)IICQGFTGK	Down	0.757	0.0065737	EP300	1.155	0.42
Suclg2	K	74	EALEAAK(1)R	Down	0.724	1.19634e-05	CREBBP	3.903	1.348
							EP300	2.413	0.42
							KAT2B	2.055	1.343
							KAT8	9.8	7.222
Suclg2	K	94	GK(1)GVFNSGLK	Down	0.725	0.00100296	CREBBP	1.819	1.348
							EP300	2.341	0.42
							HAT1	17.067	14.143
							KAT2B	1.945	1.343
							KAT5	5.125	0.71
							KAT8	13.8	7.222
Suclg2	K	140	VNK(1)VMVAEALDISR	Down	0.722	0.000205947	CREBBP	1.593	1.348
							EP300	0.746	0.42
Tbrg4	K	617	SAYLK(1)DK(1)MRK	Down	0.642	0.000919505	CREBBP	4.589	1.348
							EP300	1.734	0.42
			SAYLK(1)DK(1)MRK				CREBBP	4.802	1.348
							EP300	1.714	0.42
							KAT2A	1.435	1.382
Tcof1	K	301	ASGK(1)GPHVR	Down	0.626	0.0271429	CREBBP	3.641	1.348
							EP300	2.145	0.42
							HAT1	16.6	14.143
							KAT2A	1.449	1.382
							KAT2B	1.624	1.343
							KAT5	4.062	0.71
							KAT8	15.7	7.222
Tcof1	K	806	GAHPGTPGK(1)TGSSATQAQPGK	Down	0.696	0.000417518	CREBBP	1.746	1.348
							EP300	1.865	0.42
							KAT2B	2.183	1.343
							KAT8	12.7	7.222
Tcof1	K	157	K(1)SAEPLANTVLASETEEEGNAQALGPTAK	Down	0.693	0.000427626	CREBBP	1.762	1.348
							EP300	1.75	0.42
							KAT2B	2.028	1.343
							KAT8	10.9	7.222
Tcof1	K	74	QKAEDDETLQAK(1)K	Up	1.504	0.00106815	CREBBP	2.976	1.348
							EP300	1.387	0.42
Tcof1	K	241	TAPGPTK(1)LGNVAPTPAK	Up	1.432	9.1284e-06	CREBBP	1.548	1.348
							EP300	1.933	0.42
							KAT5	2.312	0.71
							KAT8	11.8	7.222
Tfam	K	103	VYEADFK(1)AEWK	Down	0.74	0.00117355	CREBBP	1.919	1.348
							EP300	1.133	0.42
Tfeb	K	289	RMQK(1)DLQK	Up	1.317	0.00740505	CREBBP	3.706	1.348
							EP300	1.958	0.42
							KAT2B	1.569	1.343
Timm50	K	64	AQGPQHQPGSEGPSYAK(1)K	Down	0.652	0.00317645	CREBBP	3.032	1.348
							EP300	1.115	0.42
Tkt	K	241	HQPTAIIAK(1)TFK	Down	0.766	0.00156857	CREBBP	2.359	1.348
							EP300	1.131	0.42
Tle3	K	309	DLGHNDK(1)SSTPGLK	Up	1.348	0.00204397	CREBBP	2.181	1.348
							EP300	1.345	0.42
							KAT5	1.688	0.71
							KAT8	9.2	7.222
Tmlhe	K	89	SASCYNSK(1)THQR	Up	1.756	0.000361028	CREBBP	2.935	1.348
							EP300	1.234	0.42
							KAT2A	1.391	1.382
							KAT2B	1.532	1.343
							KAT8	7.6	7.222
Top1	K	675	ADAK(1)VMK	Down	0.763	0.0025678	CREBBP	4.387	1.348
							EP300	2.06	0.42
							KAT5	0.812	0.71
							KAT8	12.9	7.222
Top3a	K	967	AQRPEAASK(1)R	Up	1.454	0.000901199	CREBBP	4.52	1.348
							EP300	3.081	0.42
							KAT2B	1.954	1.343
							KAT5	0.875	0.71
							KAT8	8.2	7.222
Tp53	K	367	AHSSYLK(1)TKKGQSTSR	Up	1.756	6.65041e-05	CREBBP	5.069	1.348
							EP300	1.883	0.42
							KAT2B	2.073	1.343
			AHSSYLKTK(1)KGQSTSR				CREBBP	3.008	1.348
							EP300	1.972	0.42
							KAT2A	1.58	1.382
			AHSSYLKTKK(1)GQSTSR				CREBBP	3.206	1.348
							EP300	1.48	0.42
Tp53	K	317	K(0.881)K(0.119)PLDGEYFTLK	Up	1.448	0.000335311	CREBBP	2.758	1.348
							EP300	1.036	0.42
							KAT2B	2.725	1.343
							KAT8	9.2	7.222
			K(0.881)K(0.119)PLDGEYFTLK				CREBBP	1.512	1.348
							EP300	0.825	0.42
							KAT2B	1.789	1.343
Trap1	K	433	FFIDQSK(1)K	Down	0.751	0.000562252	CREBBP	2.548	1.348
							EP300	1.806	0.42
							KAT5	0.875	0.71
Trap1	K	152	LVCEGQVLPEMEIHLQTDAK(1)K	Down	0.645	0.000527897	CREBBP	2.246	1.348
							EP300	0.546	0.42
Trim33	K	965	DIGKPEVEYDCDNMQHSK(1)K	Up	1.601	0.0263317	CREBBP	1.944	1.348
Trim33	K	966	K(1)GKTAQGLSPVDQR	Up	1.426	0.00370757	CREBBP	2.778	1.348
							EP300	1.607	0.42
							KAT2B	1.413	1.343
							KAT5	1.156	0.71
							KAT8	8.8	7.222
			KGK(1)TAQGLSPVDQR				CREBBP	2.641	1.348
							EP300	1.399	0.42
							HAT1	16	14.143
							KAT2B	1.972	1.343
							KAT8	14.6	7.222
Trim33	K	968	K(1)GKTAQGLSPVDQR	Up	1.345	1.19515e-05	CREBBP	2.778	1.348
							EP300	1.607	0.42
							KAT2B	1.413	1.343
							KAT5	1.156	0.71
							KAT8	8.8	7.222
			KGK(1)TAQGLSPVDQR				CREBBP	2.641	1.348
							EP300	1.399	0.42
							HAT1	16	14.143
							KAT2B	1.972	1.343
							KAT8	14.6	7.222
Trip12	K	1458	AQTAPTK(1)TSPR	Up	2.059	0.000767149	CREBBP	3.315	1.348
							EP300	3.06	0.42
							KAT2B	1.908	1.343
Trnt1	K	320	EEK(1)NLGLFIVK	Down	0.676	0.000617371	CREBBP	1.827	1.348
							EP300	1.351	0.42
							KAT2B	1.945	1.343
							KAT5	0.875	0.71
Txn2	K	110	QHGK(1)VVMAK	Down	0.753	0.00636666	CREBBP	2.629	1.348
							EP300	1.635	0.42
							KAT2B	1.404	1.343
							KAT5	1.688	0.71
							KAT8	14.1	7.222
Txnrd2	K	285	GCVPSHIK(1)K	Down	0.748	0.00282492	CREBBP	3.286	1.348
							EP300	1.69	0.42
							KAT8	9.1	7.222
Uaca	K	871	THEEVK(1)ASLNSTVEK	Down	0.612	0.000528051	CREBBP	2.855	1.348
							EP300	1.095	0.42
							KAT2B	1.578	1.343
Uba2	K	621	LEENEAASTK(1)K	Up	1.642	5.5161e-05	CREBBP	4.222	1.348
							EP300	1.94	0.42
							KAT2B	2.101	1.343
Ube2l3	K	100	PATK(1)TDQVIQSLIALVNDPQPEHPLR	Down	0.639	0.00501197	EP300	0.494	0.42
							KAT2B	2.367	1.343
							KAT8	7.4	7.222
Uqcrb	K	88	YEEDK(1)FYLEPYLK	Down	0.663	0.00674854	EP300	0.919	0.42
Uqcrc1	K	102	GTK(1)NRPGNALEK	Down	0.674	5.10112e-06	CREBBP	3.331	1.348
							EP300	2.177	0.42
							KAT2B	1.927	1.343
							KAT5	0.75	0.71
							KAT8	7.4	7.222
Uqcrc1	K	248	MVLAAAGGVEHQQLLDLAQK(1)HLSSVSR	Down	0.699	0.0185474	CREBBP	2.032	1.348
Uqcrc1	K	85	YETEK(1)NNGAGYFLEHLAFK	Down	0.654	9.39409e-05	CREBBP	1.359	1.348
							EP300	0.625	0.42
							KAT2B	1.917	1.343
Uqcrc2	K	92	LASSLTTK(1)GASSFK	Down	0.708	0.00524001	CREBBP	2.278	1.348
							EP300	1.685	0.42
							KAT5	0.844	0.71
Usp5	K	64	HFNK(1)TGQR	Down	0.592	0.00564728	CREBBP	2.669	1.348
							EP300	1.815	0.42
							KAT8	14.3	7.222
Vcp	K	668	SPVAK(1)DVDLEFLAK	Up	1.367	0.00160398	CREBBP	1.593	1.348
							EP300	1.022	0.42
							KAT2B	1.881	1.343
							KAT8	11.1	7.222
Xpnpep3	K	253	SPSEIK(1)R	Down	0.753	0.00298844	CREBBP	4.931	1.348
							EP300	2.351	0.42
							KAT2B	1.743	1.343
							KAT8	7.8	7.222
Yme1l1	K	211	NIPEAHQDAFK(1)TGFAEGFLK	Down	0.68	0.0101587	EP300	0.452	0.42
							KAT2B	1.431	1.343
