# Supplementary material for: Lysine Acetylation in the Proteome of Renal Tubular Epithelial Cells in Diabetic Nephropathy
Source: Front Genet. 2021 Nov 25;12:767135. doi: 10.3389/fgene.2021.767135 (PMC8657754; doi:10.3389/fgene.2021.767135)
Supplement: Supplementary file 12 [file Table4.xlsx]

## Sheet: motif-x
								Table S2 motif-x
	Motif Logo				Motif	Motif Score	Foreground		Background		Fold Increase
							Matches	Size	Matches	Size
					xxxxxxxxxY_K_Nxxxxxxxxx	30.36	67	5382	612	516535	10.5						xxxxxxxxxG_K_Sxxxxxxxxx	32.00
					xxxxxxxxxG_K_Sxxxxxxxxx	32.00	128	5315	2498	515923	5.0						xxxxxxxxxx_K_HxxxxxxKxx	32.00
					xxxxxxxxxx_K_NExxxxxxxx	28.50	91	5187	1163	513425	7.7						xxxxxxxxxY_K_Nxxxxxxxxx	30.36
					xxxxxxxxxG_K_Kxxxxxxxxx	29.44	90	5096	2365	512262	3.8						xxxxxxxxxG_K_Kxxxxxxxxx	29.44
					xxxxxxxxxF_K_Nxxxxxxxxx	25.18	59	5006	771	509897	7.8						xxxxxxxxxK_K_Sxxxxxxxxx	29.31
					xxxxxxxxxK_K_Sxxxxxxxxx	29.31	101	4947	2576	509126	4.0						xxxxxxxxxx_K_VDxxxxxxxx	28.81
					xxxxxxxxxA_K_Kxxxxxxxxx	26.92	81	4846	2471	506550	3.4						xxxxxxxxxx_K_NExxxxxxxx	28.50
					xxxxxxxxxP_K_Nxxxxxxxxx	25.97	61	4765	826	504079	7.8						xxxxxxxxxA_K_Kxxxxxxxxx	26.92
					xxxxxxxxxx_K_HxxxxxxKxx	32.00	54	4704	936	503253	6.2						xxxxxxxxxP_K_Nxxxxxxxxx	25.97
					xxxxxxxxxG_K_Txxxxxxxxx	23.94	79	4650	2246	502317	3.8						xxxxxxxxxF_K_Nxxxxxxxxx	25.18
					xxxxxxxxxx_K_NDxxxxxxxx	24.93	48	4571	651	500071	8.1						xxxxxxxxxG_K_Gxxxxxxxxx	25.13
					xxxxxxxxxx_K_Kxxxxxxxxx	16.00	483	4523	36211	499420	1.5						xxxxxxxxxx_K_NDxxxxxxxx	24.93
					xxxxxxxxxx_K_Sxxxxxxxxx	16.00	467	4040	29543	463209	1.8						xxxxxxxxxL_K_Nxxxxxxxxx	24.73
					xxxxxxxxxD_K_Hxxxxxxxxx	22.33	42	3573	453	433666	11.3						xxxxxxxxxG_K_Pxxxxxxxxx	24.11
					xxxxxxxxxL_K_Nxxxxxxxxx	24.73	107	3531	2341	433213	5.6						xxxxxxxxxG_K_Txxxxxxxxx	23.94
					xxxxxxxxxx_K_TDxxxxxxxx	22.27	43	3424	1133	430872	4.8
					xxxxxxxxxx_K_Hxxxxxxxxx	16.00	417	3381	11134	429739	4.8
					xxxxxxxxxx_K_Dxxxxxxxxx	16.00	414	2964	29033	418605	2.0
					xxxxxxxxxx_K_Txxxxxxxxx	16.00	378	2550	24306	389572	2.4
					xxxxxxxxxx_K_NNxxxxxxxx	22.75	38	2172	661	365266	9.7
					xxxxxxxxxG_K_Gxxxxxxxxx	25.13	71	2134	2396	364605	5.1
					xxxxxxxxxV_K_Nxxxxxxxxx	22.69	52	2063	1169	362209	7.8
					xxxxxxxxxx_K_Rxxxxxxxxx	16.00	291	2011	29674	361040	1.8
					xxxxxxxxxx_K_Nxxxxxxxxx	16.00	240	1720	12782	331366	3.6
					xxxxxxxxxx_K_VDxxxxxxxx	28.81	44	1480	1441	318584	6.6
					xxxxxxxxxG_K_Pxxxxxxxxx	24.11	48	1436	1972	317143	5.4
					xxxxxxxxxx_K_xDxxxxxxxx	16.00	146	1388	13413	315171	2.5
					xxxxxxxxxT_K_Vxxxxxxxxx	22.63	30	1242	1422	301758	5.1
					xxxxxxxxxG_K_xxxxxxxKxx	19.57	25	1212	1010	300336	6.1
					xxxxxxxxxx_K_Gxxxxxxxxx	11.61	175	1187	25692	299326	1.7
					xxxxxxxxxD_K_Vxxxxxxxxx	19.62	28	1012	1490	273634	5.1
					xxxxxxxxDx_K_xxxxxxxxxx	10.46	95	984	12638	272144	2.1
					xxxxxxxxxG_K_xxxxxxxxxx	10.03	94	889	13430	259506	2.0
					xxxxxxxxxT_K_xxxxxxxxxx	10.97	80	795	10782	246076	2.3
					xxxxxxxxxN_K_Vxxxxxxxxx	16.09	21	715	1117	235294	6.2
					xxxxxxxxxS_K_xxxxxxxxxx	8.45	101	694	18590	234177	1.8
					xxxxxxxxxY_K_xxxxxxxxxx	8.56	48	593	6664	215587	2.6
					xxxxxxxxxx_K_xxxxKxxxxx	6.47	74	545	15384	208923	1.8

## Sheet: motif annotation
Protein accession	Position	Amino acid	Motif logo
A0AUP1	53	K	xxxxxxxxxx_K_Kxxxxxxxxx
A0AUP1	183	K	xxxxxxxxxx_K_Gxxxxxxxxx
A2A432	593	K	xxxxxxxxxx_K_NExxxxxxxx
A2A432	872	K	xxxxxxxxxx_K_Hxxxxxxxxx
A2A432	691	K	xxxxxxxxxx_K_Hxxxxxxxxx
A2A432	676	K	xxxxxxxxxG_K_Sxxxxxxxxx
A2A432	112	K	xxxxxxxxxA_K_Kxxxxxxxxx
A2A432	247	K	xxxxxxxxxS_K_xxxxxxxxxx
A2A4P0	577	K	xxxxxxxxxx_K_Txxxxxxxxx
A2A6A1	479	K	xxxxxxxxxG_K_Txxxxxxxxx
A2A6A1	666	K	xxxxxxxxxG_K_Sxxxxxxxxx
A2A791	1439	K	xxxxxxxxxD_K_Vxxxxxxxxx
A2A791	761	K	xxxxxxxxxx_K_Hxxxxxxxxx
A2AD83	586	K	xxxxxxxxxx_K_Txxxxxxxxx
A2AG58	93	K	xxxxxxxxxY_K_xxxxxxxxxx
A2AG58	163	K	xxxxxxxxxG_K_Pxxxxxxxxx
A2AGH6	1770	K	xxxxxxxxxx_K_TDxxxxxxxx
A2AGH6	1800	K	xxxxxxxxxx_K_NExxxxxxxx
A2AGH6	1002	K	xxxxxxxxxV_K_Nxxxxxxxxx
A2AGX3	427	K	xxxxxxxxxx_K_Sxxxxxxxxx
Q9CY00	448	K	xxxxxxxxxx_K_Sxxxxxxxxx
A2AM29	325	K	xxxxxxxxxx_K_Kxxxxxxxxx
A2APB8	608	K	xxxxxxxxxx_K_HxxxxxxKxx
A2APB8	581	K	xxxxxxxxxx_K_Kxxxxxxxxx
A2APB8	523	K	xxxxxxxxxY_K_xxxxxxxxxx
A2APB8	384	K	xxxxxxxxxx_K_Sxxxxxxxxx
A2APB8	159	K	xxxxxxxxxx_K_Rxxxxxxxxx
A2APB8	358	K	xxxxxxxxxx_K_Sxxxxxxxxx
A2APB8	476	K	xxxxxxxxxx_K_Kxxxxxxxxx
A2APB8	128	K	xxxxxxxxxx_K_Dxxxxxxxxx
A2APB8	500	K	xxxxxxxxxx_K_Dxxxxxxxxx
A2APY7	114	K	xxxxxxxxxG_K_xxxxxxxxxx
A2AQ19	517	K	xxxxxxxxxx_K_Kxxxxxxxxx
A2AQ25	1191	K	xxxxxxxxxx_K_Sxxxxxxxxx
A2AQH4	1171	K	xxxxxxxxxG_K_xxxxxxxKxx
A2AQH4	1195	K	xxxxxxxxxx_K_Rxxxxxxxxx
A2AR02	383	K	xxxxxxxxxx_K_Sxxxxxxxxx
A2AR02	103	K	xxxxxxxxxx_K_Hxxxxxxxxx
A2AR02	52	K	xxxxxxxxxG_K_Sxxxxxxxxx
A2AR02	35	K	xxxxxxxxxx_K_Txxxxxxxxx
A2ASS6	27823	K	xxxxxxxxxx_K_Kxxxxxxxxx
A2ASZ8	312	K	xxxxxxxxxx_K_Txxxxxxxxx
A2AVR2	1025	K	xxxxxxxxxx_K_Gxxxxxxxxx
A2BH40	24	K	xxxxxxxxxx_K_Kxxxxxxxxx
A2BH40	251	K	xxxxxxxxxS_K_xxxxxxxxxx
A2BH40	1903	K	xxxxxxxxxx_K_Rxxxxxxxxx
A2BH40	1878	K	xxxxxxxxxx_K_Hxxxxxxxxx
A2CG63	472	K	xxxxxxxxxK_K_Sxxxxxxxxx
A2CG63	906	K	xxxxxxxxxx_K_Rxxxxxxxxx
A2CG63	1195	K	xxxxxxxxxG_K_Gxxxxxxxxx
A2RSY1	544	K	xxxxxxxxxT_K_Vxxxxxxxxx
A3KFM7	1903	K	xxxxxxxxxx_K_Nxxxxxxxxx
A3KGB4	1099	K	xxxxxxxxxx_K_xxxxKxxxxx
A3KGB4	1104	K	xxxxxxxxxx_K_Sxxxxxxxxx
A3KGS3	1146	K	xxxxxxxxxL_K_Nxxxxxxxxx
A6H611	229	K	xxxxxxxxxx_K_Sxxxxxxxxx
A6H611	85	K	xxxxxxxxxx_K_Txxxxxxxxx
A6H611	543	K	xxxxxxxxxx_K_Hxxxxxxxxx
A6H619	820	K	xxxxxxxxxx_K_Kxxxxxxxxx
A6H619	768	K	xxxxxxxxxG_K_Gxxxxxxxxx
A6H694	139	K	xxxxxxxxxx_K_Kxxxxxxxxx
A6PWY4	291	K	xxxxxxxxxx_K_Sxxxxxxxxx
B1AQJ2	690	K	xxxxxxxxxA_K_Kxxxxxxxxx
B1AR13	124	K	xxxxxxxxxx_K_Sxxxxxxxxx
B1AUR6	1065	K	xxxxxxxxxx_K_HxxxxxxKxx
B1AZI6	1084	K	xxxxxxxxxx_K_xDxxxxxxxx
B1AZI6	1513	K	xxxxxxxxxx_K_Sxxxxxxxxx
B1AZI6	35	K	xxxxxxxxxx_K_Sxxxxxxxxx
B1AZI6	1177	K	xxxxxxxxxx_K_Sxxxxxxxxx
B1AZI6	1106	K	xxxxxxxxxT_K_xxxxxxxxxx
B1AZI6	528	K	xxxxxxxxxx_K_NExxxxxxxx
B2KF05	89	K	xxxxxxxxxx_K_Sxxxxxxxxx
B2KF05	91	K	xxxxxxxxxx_K_Kxxxxxxxxx
B2KF05	105	K	xxxxxxxxxx_K_Hxxxxxxxxx
B2KF05	1038	K	xxxxxxxxxG_K_Pxxxxxxxxx
B2KF05	100	K	xxxxxxxxxx_K_xxxxKxxxxx
B2KF05	379	K	xxxxxxxxxx_K_Txxxxxxxxx
B2KF05	331	K	xxxxxxxxxx_K_Gxxxxxxxxx
B2KF05	670	K	xxxxxxxxxx_K_Dxxxxxxxxx
B2RQC6	2036	K	xxxxxxxxxx_K_Hxxxxxxxxx
B2RQC6	1325	K	xxxxxxxxxx_K_Sxxxxxxxxx
B2RRD7	18	K	xxxxxxxxxT_K_xxxxxxxxxx
B2RRD7	147	K	xxxxxxxxxx_K_Sxxxxxxxxx
B2RRD7	150	K	xxxxxxxxxx_K_HxxxxxxKxx
B2RRD7	152	K	xxxxxxxxxx_K_Nxxxxxxxxx
B2RRD7	1025	K	xxxxxxxxxG_K_Pxxxxxxxxx
B2RRD7	8	K	xxxxxxxxxx_K_Txxxxxxxxx
B2RRD7	894	K	xxxxxxxxxx_K_Kxxxxxxxxx
B2RRD7	709	K	xxxxxxxxxx_K_Dxxxxxxxxx
B2RRE7	342	K	xxxxxxxxxG_K_Kxxxxxxxxx
B2RRE7	926	K	xxxxxxxxxx_K_Hxxxxxxxxx
B2RWS6	1636	K	xxxxxxxxxD_K_Hxxxxxxxxx
P45481	1712	K	xxxxxxxxxx_K_Hxxxxxxxxx
B2RWS6	1545	K	xxxxxxxxxx_K_Nxxxxxxxxx
B2RWS6	1548	K	xxxxxxxxxA_K_Kxxxxxxxxx
B2RWS6	1549	K	xxxxxxxxxx_K_Kxxxxxxxxx
B2RWS6	1550	K	xxxxxxxxxx_K_NNxxxxxxxx
B2RWS6	1553	K	xxxxxxxxxx_K_Kxxxxxxxxx
B2RWS6	1179	K	xxxxxxxxxG_K_xxxxxxxxxx
B2RWS6	1554	K	xxxxxxxxxx_K_Txxxxxxxxx
B2RWS6	1557	K	xxxxxxxxxx_K_Nxxxxxxxxx
B2RWS6	1559	K	xxxxxxxxxx_K_Sxxxxxxxxx
B2RWS6	1589	K	xxxxxxxxxx_K_Hxxxxxxxxx
B2RWS6	1541	K	xxxxxxxxxx_K_xDxxxxxxxx
B2RWS6	1703	K	xxxxxxxxDx_K_xxxxxxxxxx
P45481	1832	K	xxxxxxxxxx_K_Hxxxxxxxxx
P45481	1807	K	xxxxxxxxxx_K_Gxxxxxxxxx
P45481	1810	K	xxxxxxxxxx_K_Rxxxxxxxxx
B2RX14	784	K	xxxxxxxxxx_K_Hxxxxxxxxx
B2RXC1	216	K	xxxxxxxxxx_K_Txxxxxxxxx
B2RXS4	1513	K	xxxxxxxxxx_K_xDxxxxxxxx
B2RXV4	327	K	xxxxxxxxxx_K_Sxxxxxxxxx
B2RY04	497	K	xxxxxxxxxx_K_Sxxxxxxxxx
B2RY56	729	K	xxxxxxxxxx_K_Rxxxxxxxxx
B2RY56	734	K	xxxxxxxxxx_K_Sxxxxxxxxx
B2RY56	155	K	xxxxxxxxxx_K_Kxxxxxxxxx
B2RY56	832	K	xxxxxxxxxA_K_Kxxxxxxxxx
B2RY56	135	K	xxxxxxxxxY_K_xxxxxxxxxx
B7ZMP1	403	K	xxxxxxxxxx_K_Txxxxxxxxx
B7ZMP1	253	K	xxxxxxxxxx_K_Rxxxxxxxxx
B9EJ86	649	K	xxxxxxxxxx_K_TDxxxxxxxx
B9EJ86	117	K	xxxxxxxxxx_K_Kxxxxxxxxx
B9EKI3	1075	K	xxxxxxxxxV_K_Nxxxxxxxxx
C0HKD9	371	K	xxxxxxxxxx_K_Txxxxxxxxx
C0HKD9	43	K	xxxxxxxxxx_K_Rxxxxxxxxx
C0HKE9	6	K	xxxxxxxxxG_K_xxxxxxxKxx
C0HKE9	10	K	xxxxxxxxxG_K_xxxxxxxxxx
C0HKE9	37	K	xxxxxxxxxx_K_Gxxxxxxxxx
C0HKE9	120	K	xxxxxxxxxx_K_Txxxxxxxxx
C0HKE9	119	K	xxxxxxxxxx_K_Kxxxxxxxxx
D0QMC3	80	K	xxxxxxxxxx_K_xxxxKxxxxx
D0QMC3	82	K	xxxxxxxxxx_K_Txxxxxxxxx
D0QMC3	85	K	xxxxxxxxxx_K_xxxxKxxxxx
D0QMC3	87	K	xxxxxxxxxx_K_xxxxKxxxxx
D0QMC3	72	K	xxxxxxxxxx_K_Dxxxxxxxxx
D3YVL2	408	K	xxxxxxxxxx_K_Nxxxxxxxxx
D3YXJ0	1126	K	xxxxxxxxxx_K_Kxxxxxxxxx
D3YXJ0	1127	K	xxxxxxxxxx_K_xxxxKxxxxx
D3YXJ0	1129	K	xxxxxxxxxx_K_xxxxKxxxxx
D3YXK2	316	K	xxxxxxxxxx_K_Rxxxxxxxxx
D3YXK2	600	K	xxxxxxxxxx_K_Txxxxxxxxx
D3YXK2	615	K	xxxxxxxxxx_K_Sxxxxxxxxx
D3YXK2	54	K	xxxxxxxxxx_K_Sxxxxxxxxx
D3YXK2	559	K	xxxxxxxxxx_K_Dxxxxxxxxx
D3YXK2	592	K	xxxxxxxxxx_K_Gxxxxxxxxx
D3YXK2	629	K	xxxxxxxxxD_K_Vxxxxxxxxx
D3YXK2	590	K	xxxxxxxxxx_K_Sxxxxxxxxx
D3YZG8	304	K	xxxxxxxxxx_K_Kxxxxxxxxx
D3Z7P3	284	K	xxxxxxxxxT_K_Vxxxxxxxxx
D3Z7P3	250	K	xxxxxxxxxG_K_xxxxxxxxxx
D3Z7P3	316	K	xxxxxxxxxG_K_xxxxxxxxxx
E9PVX6	2928	K	xxxxxxxxxx_K_Sxxxxxxxxx
E9PVX6	1389	K	xxxxxxxxxG_K_Kxxxxxxxxx
E9PVX6	2216	K	xxxxxxxxxG_K_Kxxxxxxxxx
E9PVX6	2707	K	xxxxxxxxxx_K_Kxxxxxxxxx
E9PVX6	169	K	xxxxxxxxxx_K_Nxxxxxxxxx
E9PVX6	785	K	xxxxxxxxxP_K_Nxxxxxxxxx
E9PVX6	2451	K	xxxxxxxxxx_K_NExxxxxxxx
E9PVX6	2828	K	xxxxxxxxxS_K_xxxxxxxxxx
E9PVX6	2320	K	xxxxxxxxxx_K_Txxxxxxxxx
E9PVX6	156	K	xxxxxxxxxx_K_Gxxxxxxxxx
E9PVX6	1021	K	xxxxxxxxxG_K_Kxxxxxxxxx
E9PVX6	245	K	xxxxxxxxxx_K_Sxxxxxxxxx
E9PVX6	249	K	xxxxxxxxxx_K_Sxxxxxxxxx
E9PVX6	3074	K	xxxxxxxxxA_K_Kxxxxxxxxx
E9PVX6	3171	K	xxxxxxxxxx_K_Kxxxxxxxxx
E9PVX6	107	K	xxxxxxxxxS_K_xxxxxxxxxx
E9PVX6	114	K	xxxxxxxxxG_K_Sxxxxxxxxx
E9PYH6	955	K	xxxxxxxxxT_K_xxxxxxxxxx
E9PYL2	387	K	xxxxxxxxxx_K_Txxxxxxxxx
E9PYL2	615	K	xxxxxxxxxG_K_Gxxxxxxxxx
E9PZJ8	573	K	xxxxxxxxxx_K_Sxxxxxxxxx
E9Q1P8	271	K	xxxxxxxxxG_K_Gxxxxxxxxx
E9Q2Z1	575	K	xxxxxxxxxG_K_Sxxxxxxxxx
E9Q309	1116	K	xxxxxxxxxx_K_Sxxxxxxxxx
E9Q3L2	610	K	xxxxxxxxxx_K_Dxxxxxxxxx
E9Q4N7	1168	K	xxxxxxxxxx_K_Kxxxxxxxxx
E9Q4N7	1090	K	xxxxxxxxxG_K_Kxxxxxxxxx
E9Q4N7	1624	K	xxxxxxxxxx_K_Dxxxxxxxxx
E9Q4N7	603	K	xxxxxxxxxG_K_Sxxxxxxxxx
E9Q555	323	K	xxxxxxxxxx_K_Txxxxxxxxx
E9Q555	577	K	xxxxxxxxxG_K_Sxxxxxxxxx
E9Q557	490	K	xxxxxxxxxx_K_xDxxxxxxxx
E9Q557	1425	K	xxxxxxxxxL_K_Nxxxxxxxxx
E9Q557	815	K	xxxxxxxxxD_K_Vxxxxxxxxx
E9Q557	1422	K	xxxxxxxxxx_K_Rxxxxxxxxx
E9Q5C9	113	K	xxxxxxxxxx_K_Rxxxxxxxxx
E9Q5C9	509	K	xxxxxxxxxG_K_Kxxxxxxxxx
E9Q5C9	123	K	xxxxxxxxxG_K_xxxxxxxxxx
E9Q5C9	547	K	xxxxxxxxxS_K_xxxxxxxxxx
E9Q5C9	77	K	xxxxxxxxxx_K_Kxxxxxxxxx
E9Q5F9	923	K	xxxxxxxxxG_K_Gxxxxxxxxx
E9Q5F9	311	K	xxxxxxxxxK_K_Sxxxxxxxxx
E9Q5F9	360	K	xxxxxxxxxx_K_Sxxxxxxxxx
E9Q5F9	1187	K	xxxxxxxxxx_K_Sxxxxxxxxx
E9Q5G3	392	K	xxxxxxxxDx_K_xxxxxxxxxx
E9Q5G3	398	K	xxxxxxxxxF_K_Nxxxxxxxxx
E9Q5K9	458	K	xxxxxxxxxx_K_Sxxxxxxxxx
E9Q5K9	90	K	xxxxxxxxxG_K_Sxxxxxxxxx
E9Q5K9	96	K	xxxxxxxxxY_K_Nxxxxxxxxx
E9Q5K9	132	K	xxxxxxxxxx_K_Txxxxxxxxx
E9Q634	17	K	xxxxxxxxxx_K_Hxxxxxxxxx
E9Q6J5	710	K	xxxxxxxxxG_K_Gxxxxxxxxx
E9Q6J5	1386	K	xxxxxxxxxx_K_Sxxxxxxxxx
E9Q6J5	1100	K	xxxxxxxxxK_K_Sxxxxxxxxx
E9Q6J5	2823	K	xxxxxxxxxx_K_Sxxxxxxxxx
E9Q6J5	534	K	xxxxxxxxxG_K_Sxxxxxxxxx
E9Q784	68	K	xxxxxxxxxG_K_Gxxxxxxxxx
E9Q784	1449	K	xxxxxxxxxx_K_Rxxxxxxxxx
E9Q7E2	1683	K	xxxxxxxxxD_K_Hxxxxxxxxx
E9Q7G0	377	K	xxxxxxxxxx_K_NExxxxxxxx
E9Q7G0	1110	K	xxxxxxxxxG_K_Txxxxxxxxx
E9Q7G0	443	K	xxxxxxxxxG_K_xxxxxxxxxx
E9Q7G0	73	K	xxxxxxxxxx_K_Hxxxxxxxxx
E9Q7G0	1147	K	xxxxxxxxxx_K_Sxxxxxxxxx
E9Q7G0	301	K	xxxxxxxxxx_K_Txxxxxxxxx
E9Q7G0	1606	K	xxxxxxxxxA_K_Kxxxxxxxxx
E9Q7G0	1917	K	xxxxxxxxxx_K_Txxxxxxxxx
E9Q7G0	1986	K	xxxxxxxxxx_K_Kxxxxxxxxx
E9Q9K5	219	K	xxxxxxxxxA_K_Kxxxxxxxxx
E9QAM5	2876	K	xxxxxxxxxx_K_Sxxxxxxxxx
F6ZDS4	551	K	xxxxxxxxxx_K_Hxxxxxxxxx
F6ZDS4	438	K	xxxxxxxxxx_K_Rxxxxxxxxx
F6ZDS4	969	K	xxxxxxxxxL_K_Nxxxxxxxxx
F6ZDS4	797	K	xxxxxxxxxx_K_Rxxxxxxxxx
F6ZDS4	926	K	xxxxxxxxxx_K_Kxxxxxxxxx
F6ZDS4	1030	K	xxxxxxxxxx_K_Txxxxxxxxx
F6ZDS4	1718	K	xxxxxxxxxx_K_Txxxxxxxxx
F6ZDS4	1633	K	xxxxxxxxxS_K_xxxxxxxxxx
F6ZDS4	787	K	xxxxxxxxxT_K_xxxxxxxxxx
F6ZDS4	999	K	xxxxxxxxxG_K_Gxxxxxxxxx
F6ZDS4	326	K	xxxxxxxxxx_K_HxxxxxxKxx
F6ZDS4	1760	K	xxxxxxxxxx_K_Sxxxxxxxxx
F7BJB9	152	K	xxxxxxxxxx_K_Hxxxxxxxxx
F7BJB9	205	K	xxxxxxxxxY_K_Nxxxxxxxxx
F8VPQ2	1103	K	xxxxxxxxxx_K_Txxxxxxxxx
F8VPU2	696	K	xxxxxxxxxx_K_HxxxxxxKxx
F8VPZ9	1067	K	xxxxxxxxxG_K_Pxxxxxxxxx
F8VPZ9	1076	K	xxxxxxxxDx_K_xxxxxxxxxx
G3UW99	66	K	xxxxxxxxxx_K_xDxxxxxxxx
G3X9G7	158	K	xxxxxxxxxx_K_Dxxxxxxxxx
G5E829	590	K	xxxxxxxxxL_K_Nxxxxxxxxx
G5E870	1458	K	xxxxxxxxxx_K_Txxxxxxxxx
G5E870	848	K	xxxxxxxxxx_K_Kxxxxxxxxx
G5E870	623	K	xxxxxxxxxK_K_Sxxxxxxxxx
G5E8K5	1913	K	xxxxxxxxxx_K_Kxxxxxxxxx
G5E8K5	579	K	xxxxxxxxxG_K_Sxxxxxxxxx
G5E8P1	418	K	xxxxxxxxxx_K_Txxxxxxxxx
G5E8P1	604	K	xxxxxxxxxx_K_Hxxxxxxxxx
G5E8P1	23	K	xxxxxxxxxx_K_Hxxxxxxxxx
G5E8P1	981	K	xxxxxxxxxx_K_Sxxxxxxxxx
G5E8P1	413	K	xxxxxxxxxx_K_xxxxKxxxxx
G5E8P1	100	K	xxxxxxxxxx_K_NExxxxxxxx
G5E8P1	381	K	xxxxxxxxxx_K_Txxxxxxxxx
G5E8P1	407	K	xxxxxxxxxx_K_Nxxxxxxxxx
G5E8P1	644	K	xxxxxxxxxx_K_Dxxxxxxxxx
O08528	337	K	xxxxxxxxxx_K_Dxxxxxxxxx
O08528	346	K	xxxxxxxxxx_K_Dxxxxxxxxx
O08528	418	K	xxxxxxxxxx_K_Kxxxxxxxxx
O08550	805	K	xxxxxxxxxx_K_xxxxKxxxxx
O08550	1269	K	xxxxxxxxxx_K_Hxxxxxxxxx
O08550	964	K	xxxxxxxxxG_K_Kxxxxxxxxx
O08579	80	K	xxxxxxxxxx_K_xDxxxxxxxx
O08579	89	K	xxxxxxxxxx_K_Dxxxxxxxxx
O08583	233	K	xxxxxxxxxS_K_xxxxxxxxxx
Q8VDD5	228	K	xxxxxxxxxx_K_NDxxxxxxxx
O08648	91	K	xxxxxxxxxx_K_Hxxxxxxxxx
O08663	385	K	xxxxxxxxxx_K_Nxxxxxxxxx
O08691	210	K	xxxxxxxxxL_K_Nxxxxxxxxx
O08715	407	K	xxxxxxxxxP_K_Nxxxxxxxxx
O08749	430	K	xxxxxxxxxx_K_Txxxxxxxxx
O08749	104	K	xxxxxxxxxx_K_Dxxxxxxxxx
O08749	146	K	xxxxxxxxxN_K_Vxxxxxxxxx
O08749	445	K	xxxxxxxxxx_K_Sxxxxxxxxx
O08749	159	K	xxxxxxxxxx_K_Nxxxxxxxxx
O08749	166	K	xxxxxxxxxx_K_xDxxxxxxxx
O08749	277	K	xxxxxxxxxT_K_Vxxxxxxxxx
O08749	127	K	xxxxxxxxxx_K_Hxxxxxxxxx
O08749	334	K	xxxxxxxxxx_K_Gxxxxxxxxx
O08749	66	K	xxxxxxxxxx_K_Txxxxxxxxx
O08749	72	K	xxxxxxxxxx_K_NExxxxxxxx
O08756	105	K	xxxxxxxxxx_K_Nxxxxxxxxx
O08784	313	K	xxxxxxxxxx_K_Gxxxxxxxxx
O08784	318	K	xxxxxxxxxG_K_Gxxxxxxxxx
O08784	301	K	xxxxxxxxxG_K_Gxxxxxxxxx
O08784	1082	K	xxxxxxxxxx_K_Dxxxxxxxxx
O08784	806	K	xxxxxxxxxG_K_Txxxxxxxxx
O08784	327	K	xxxxxxxxxG_K_Txxxxxxxxx
O08784	1240	K	xxxxxxxxxG_K_Gxxxxxxxxx
O08784	635	K	xxxxxxxxxG_K_xxxxxxxxxx
O08784	157	K	xxxxxxxxxK_K_Sxxxxxxxxx
O08784	1200	K	xxxxxxxxxP_K_Nxxxxxxxxx
O08784	871	K	xxxxxxxxxx_K_Kxxxxxxxxx
O08784	74	K	xxxxxxxxxA_K_Kxxxxxxxxx
O08784	630	K	xxxxxxxxxG_K_Gxxxxxxxxx
O08784	132	K	xxxxxxxxxx_K_Txxxxxxxxx
O08784	144	K	xxxxxxxxxG_K_Txxxxxxxxx
O08784	241	K	xxxxxxxxxT_K_xxxxxxxxxx
O08784	372	K	xxxxxxxxxG_K_Sxxxxxxxxx
O08784	626	K	xxxxxxxxxG_K_Sxxxxxxxxx
O08788	1154	K	xxxxxxxxxx_K_Txxxxxxxxx
O08795	167	K	xxxxxxxxxK_K_Sxxxxxxxxx
O08795	166	K	xxxxxxxxxG_K_Kxxxxxxxxx
O08795	431	K	xxxxxxxxxx_K_Hxxxxxxxxx
O08807	189	K	xxxxxxxxxx_K_Dxxxxxxxxx
O08807	243	K	xxxxxxxxxD_K_Hxxxxxxxxx
O08810	195	K	xxxxxxxxxG_K_Sxxxxxxxxx
O08810	351	K	xxxxxxxxxx_K_Txxxxxxxxx
O08810	141	K	xxxxxxxxxG_K_Txxxxxxxxx
O08856	507	K	xxxxxxxxxY_K_Nxxxxxxxxx
O08901	980	K	xxxxxxxxxx_K_NExxxxxxxx
O08915	210	K	xxxxxxxxxL_K_Nxxxxxxxxx
O08989	185	K	xxxxxxxxxx_K_Kxxxxxxxxx
O08989	186	K	xxxxxxxxxx_K_Kxxxxxxxxx
O08997	3	K	xxxxxxxxxx_K_Hxxxxxxxxx
O09000	609	K	xxxxxxxxxx_K_Gxxxxxxxxx
O09053	87	K	xxxxxxxxxx_K_Rxxxxxxxxx
O09061	183	K	xxxxxxxxxF_K_Nxxxxxxxxx
O09106	412	K	xxxxxxxxxx_K_Rxxxxxxxxx
O09126	567	K	xxxxxxxxxx_K_HxxxxxxKxx
O09131	57	K	xxxxxxxxxL_K_Nxxxxxxxxx
O09167	60	K	xxxxxxxxxG_K_Txxxxxxxxx
O09167	97	K	xxxxxxxxxx_K_Hxxxxxxxxx
O09174	57	K	xxxxxxxxxx_K_Rxxxxxxxxx
O35098	258	K	xxxxxxxxxx_K_Gxxxxxxxxx
O35129	296	K	xxxxxxxxxx_K_Gxxxxxxxxx
O35130	70	K	xxxxxxxxxx_K_Sxxxxxxxxx
O35130	59	K	xxxxxxxxxG_K_Txxxxxxxxx
O35134	550	K	xxxxxxxxxV_K_Nxxxxxxxxx
O35134	182	K	xxxxxxxxxV_K_Nxxxxxxxxx
O35134	234	K	xxxxxxxxxK_K_Sxxxxxxxxx
O35143	103	K	xxxxxxxxxL_K_Nxxxxxxxxx
O35143	72	K	xxxxxxxxxx_K_Hxxxxxxxxx
O35143	83	K	xxxxxxxxxS_K_xxxxxxxxxx
O35218	680	K	xxxxxxxxxx_K_Sxxxxxxxxx
O35218	459	K	xxxxxxxxxK_K_Sxxxxxxxxx
O35280	53	K	xxxxxxxxxx_K_Kxxxxxxxxx
O35286	491	K	xxxxxxxxxx_K_Txxxxxxxxx
O35286	777	K	xxxxxxxxxx_K_Rxxxxxxxxx
O35286	17	K	xxxxxxxxxG_K_Kxxxxxxxxx
O35309	68	K	xxxxxxxxxx_K_Kxxxxxxxxx
O35316	11	K	xxxxxxxxxx_K_Dxxxxxxxxx
O35326	181	K	xxxxxxxxxx_K_Rxxxxxxxxx
O35326	158	K	xxxxxxxxxL_K_Nxxxxxxxxx
O35326	167	K	xxxxxxxxxG_K_xxxxxxxKxx
O35345	18	K	xxxxxxxxxY_K_Nxxxxxxxxx
O35350	426	K	xxxxxxxxxx_K_Hxxxxxxxxx
O35387	206	K	xxxxxxxxxx_K_Sxxxxxxxxx
O35427	34	K	xxxxxxxxxx_K_Hxxxxxxxxx
O35435	99	K	xxxxxxxxxD_K_Hxxxxxxxxx
O35454	649	K	xxxxxxxxxx_K_Gxxxxxxxxx
O35459	316	K	xxxxxxxxxx_K_Rxxxxxxxxx
O35465	246	K	xxxxxxxxxx_K_VDxxxxxxxx
O35465	330	K	xxxxxxxxxx_K_Txxxxxxxxx
O35492	328	K	xxxxxxxxxG_K_Sxxxxxxxxx
O35493	296	K	xxxxxxxxxx_K_Sxxxxxxxxx
O35544	157	K	xxxxxxxxxS_K_xxxxxxxxxx
O35593	223	K	xxxxxxxxxK_K_Sxxxxxxxxx
O35593	239	K	xxxxxxxxxx_K_Hxxxxxxxxx
O35598	45	K	xxxxxxxxxx_K_Hxxxxxxxxx
O35598	357	K	xxxxxxxxxK_K_Sxxxxxxxxx
O35638	55	K	xxxxxxxxxG_K_Sxxxxxxxxx
O35638	755	K	xxxxxxxxxx_K_xDxxxxxxxx
O35638	607	K	xxxxxxxxxx_K_Hxxxxxxxxx
O35639	169	K	xxxxxxxxxx_K_VDxxxxxxxx
O35639	176	K	xxxxxxxxxA_K_Kxxxxxxxxx
O35639	177	K	xxxxxxxxxx_K_Dxxxxxxxxx
O35639	293	K	xxxxxxxxxx_K_Hxxxxxxxxx
O35639	138	K	xxxxxxxxxK_K_Sxxxxxxxxx
O35639	263	K	xxxxxxxxxx_K_Gxxxxxxxxx
O35648	31	K	xxxxxxxxxx_K_Dxxxxxxxxx
O35658	91	K	xxxxxxxxxx_K_Kxxxxxxxxx
O35658	176	K	xxxxxxxxxx_K_Txxxxxxxxx
O35691	561	K	xxxxxxxxxx_K_Sxxxxxxxxx
O35737	98	K	xxxxxxxxxx_K_Hxxxxxxxxx
O35841	398	K	xxxxxxxxxG_K_Txxxxxxxxx
O35841	454	K	xxxxxxxxxx_K_Rxxxxxxxxx
O35857	249	K	xxxxxxxxxx_K_Dxxxxxxxxx
O35887	281	K	xxxxxxxxxx_K_Dxxxxxxxxx
O35887	165	K	xxxxxxxxxx_K_Dxxxxxxxxx
O35887	37	K	xxxxxxxxxD_K_Vxxxxxxxxx
O35887	59	K	xxxxxxxxxx_K_Sxxxxxxxxx
O35943	194	K	xxxxxxxxxx_K_xDxxxxxxxx
O54734	174	K	xxxxxxxxxG_K_Sxxxxxxxxx
O54774	352	K	xxxxxxxxxx_K_Dxxxxxxxxx
O54784	150	K	xxxxxxxxxx_K_HxxxxxxKxx
O54788	201	K	xxxxxxxxxx_K_Sxxxxxxxxx
O54824	605	K	xxxxxxxxxF_K_Nxxxxxxxxx
O54824	612	K	xxxxxxxxxx_K_Kxxxxxxxxx
O54826	305	K	xxxxxxxxxx_K_Dxxxxxxxxx
O54826	451	K	xxxxxxxxxx_K_Rxxxxxxxxx
O54826	135	K	xxxxxxxxxx_K_Txxxxxxxxx
O54833	260	K	xxxxxxxxxx_K_Kxxxxxxxxx
O54941	271	K	xxxxxxxxxx_K_Rxxxxxxxxx
O54950	99	K	xxxxxxxxxx_K_Sxxxxxxxxx
O54965	141	K	xxxxxxxxxx_K_Kxxxxxxxxx
O54967	42	K	xxxxxxxxxx_K_NExxxxxxxx
O54988	1174	K	xxxxxxxxxx_K_xxxxKxxxxx
O54990	384	K	xxxxxxxxxV_K_Nxxxxxxxxx
O54990	351	K	xxxxxxxxxx_K_TDxxxxxxxx
O55023	28	K	xxxxxxxxxx_K_NExxxxxxxx
O55028	184	K	xxxxxxxxDx_K_xxxxxxxxxx
O55028	178	K	xxxxxxxxxx_K_Hxxxxxxxxx
O55028	143	K	xxxxxxxxxx_K_Dxxxxxxxxx
O55028	89	K	xxxxxxxxxx_K_Sxxxxxxxxx
O55028	192	K	xxxxxxxxxx_K_Txxxxxxxxx
O55029	318	K	xxxxxxxxxx_K_Hxxxxxxxxx
O55029	386	K	xxxxxxxxxx_K_Sxxxxxxxxx
O55033	249	K	xxxxxxxxxP_K_Nxxxxxxxxx
O55111	385	K	xxxxxxxxxV_K_Nxxxxxxxxx
O55125	73	K	xxxxxxxxxY_K_xxxxxxxxxx
O55125	51	K	xxxxxxxxxx_K_VDxxxxxxxx
O55126	94	K	xxxxxxxxxx_K_xxxxKxxxxx
O55126	53	K	xxxxxxxxxx_K_Dxxxxxxxxx
O55131	207	K	xxxxxxxxxx_K_Kxxxxxxxxx
O55142	45	K	xxxxxxxxxx_K_Rxxxxxxxxx
O55143	571	K	xxxxxxxxxx_K_Rxxxxxxxxx
O55143	205	K	xxxxxxxxxx_K_Nxxxxxxxxx
O55143	712	K	xxxxxxxxxK_K_Sxxxxxxxxx
O55201	145	K	xxxxxxxxxx_K_Sxxxxxxxxx
O70133	29	K	xxxxxxxxxx_K_Nxxxxxxxxx
O70133	148	K	xxxxxxxxxx_K_Dxxxxxxxxx
O70133	419	K	xxxxxxxxxG_K_Txxxxxxxxx
O70133	469	K	xxxxxxxxxG_K_Sxxxxxxxxx
O70133	1026	K	xxxxxxxxxx_K_Sxxxxxxxxx
O70133	266	K	xxxxxxxxxx_K_Kxxxxxxxxx
O70133	54	K	xxxxxxxxxx_K_Kxxxxxxxxx
O70157	967	K	xxxxxxxxxx_K_Rxxxxxxxxx
O70194	458	K	xxxxxxxxxx_K_Dxxxxxxxxx
O70201	23	K	xxxxxxxxxF_K_Nxxxxxxxxx
O70228	604	K	xxxxxxxxxK_K_Sxxxxxxxxx
O70228	151	K	xxxxxxxxxx_K_Sxxxxxxxxx
O70230	95	K	xxxxxxxxxx_K_Sxxxxxxxxx
O70230	424	K	xxxxxxxxxG_K_Txxxxxxxxx
O70251	139	K	xxxxxxxxxx_K_Sxxxxxxxxx
O70251	129	K	xxxxxxxxxx_K_Kxxxxxxxxx
O70251	185	K	xxxxxxxxxx_K_Kxxxxxxxxx
O70318	229	K	xxxxxxxxxx_K_Rxxxxxxxxx
O70374	572	K	xxxxxxxxxx_K_Txxxxxxxxx
O70400	307	K	xxxxxxxxxx_K_Hxxxxxxxxx
O70401	123	K	xxxxxxxxxx_K_Sxxxxxxxxx
O70404	47	K	xxxxxxxxxx_K_Txxxxxxxxx
O70404	24	K	xxxxxxxxxV_K_Nxxxxxxxxx
O70433	17	K	xxxxxxxxxG_K_Kxxxxxxxxx
O70435	206	K	xxxxxxxxxx_K_Dxxxxxxxxx
O70435	174	K	xxxxxxxxxx_K_Txxxxxxxxx
O70435	110	K	xxxxxxxxxx_K_Hxxxxxxxxx
O70439	140	K	xxxxxxxxxx_K_Nxxxxxxxxx
P63101	122	K	xxxxxxxxxx_K_xDxxxxxxxx
O70456	49	K	xxxxxxxxxY_K_Nxxxxxxxxx
O70546	799	K	xxxxxxxxxD_K_Vxxxxxxxxx
P79457	1176	K	xxxxxxxxxx_K_Txxxxxxxxx
O70572	219	K	xxxxxxxxxP_K_Nxxxxxxxxx
O88271	186	K	xxxxxxxxxx_K_Sxxxxxxxxx
O88307	1902	K	xxxxxxxxxx_K_Dxxxxxxxxx
O88342	256	K	xxxxxxxxxx_K_Txxxxxxxxx
O88342	219	K	xxxxxxxxxG_K_Txxxxxxxxx
O88342	334	K	xxxxxxxxxG_K_Sxxxxxxxxx
O88379	1551	K	xxxxxxxxxA_K_Kxxxxxxxxx
O88447	438	K	xxxxxxxxxG_K_xxxxxxxxxx
O88447	440	K	xxxxxxxxxx_K_Dxxxxxxxxx
O88455	385	K	xxxxxxxxxx_K_Hxxxxxxxxx
O88491	1478	K	xxxxxxxxxG_K_xxxxxxxxxx
O88491	1764	K	xxxxxxxxDx_K_xxxxxxxxxx
O88491	2148	K	xxxxxxxxxK_K_Sxxxxxxxxx
O88532	527	K	xxxxxxxxxV_K_Nxxxxxxxxx
O88532	516	K	xxxxxxxxxx_K_Txxxxxxxxx
O88532	495	K	xxxxxxxxxA_K_Kxxxxxxxxx
O88543	304	K	xxxxxxxxxx_K_Kxxxxxxxxx
O88551	189	K	xxxxxxxxxx_K_Txxxxxxxxx
O88554	36	K	xxxxxxxxxG_K_Kxxxxxxxxx
O88554	51	K	xxxxxxxxxx_K_Dxxxxxxxxx
O88559	517	K	xxxxxxxxxx_K_Txxxxxxxxx
O88569	104	K	xxxxxxxxxG_K_Pxxxxxxxxx
O88569	112	K	xxxxxxxxxx_K_Kxxxxxxxxx
O88569	3	K	xxxxxxxxxx_K_Txxxxxxxxx
O88569	46	K	xxxxxxxxxG_K_xxxxxxxxxx
O88573	217	K	xxxxxxxxxx_K_Sxxxxxxxxx
O88643	63	K	xxxxxxxxxx_K_Txxxxxxxxx
O88665	186	K	xxxxxxxxxx_K_NNxxxxxxxx
O88696	210	K	xxxxxxxxxT_K_xxxxxxxxxx
O88696	207	K	xxxxxxxxxx_K_Hxxxxxxxxx
O88708	5	K	xxxxxxxxxx_K_Txxxxxxxxx
O88708	7	K	xxxxxxxxxx_K_Sxxxxxxxxx
O88738	898	K	xxxxxxxxxK_K_Sxxxxxxxxx
O88746	106	K	xxxxxxxxxP_K_Nxxxxxxxxx
O88844	236	K	xxxxxxxxxx_K_Sxxxxxxxxx
O88874	377	K	xxxxxxxxDx_K_xxxxxxxxxx
O88967	686	K	xxxxxxxxxx_K_Nxxxxxxxxx
O88967	679	K	xxxxxxxxxx_K_Txxxxxxxxx
O88967	211	K	xxxxxxxxxx_K_Txxxxxxxxx
O88983	98	K	xxxxxxxxxx_K_NExxxxxxxx
O88986	110	K	xxxxxxxxxx_K_Nxxxxxxxxx
O89001	1354	K	xxxxxxxxxK_K_Sxxxxxxxxx
O89016	357	K	xxxxxxxxxx_K_Sxxxxxxxxx
O89050	563	K	xxxxxxxxxY_K_Nxxxxxxxxx
O89106	119	K	xxxxxxxxxx_K_Hxxxxxxxxx
P00493	103	K	xxxxxxxxxx_K_Sxxxxxxxxx
P01027	1381	K	xxxxxxxxxx_K_Nxxxxxxxxx
P14428	125	K	xxxxxxxxxx_K_Hxxxxxxxxx
P02340	367	K	xxxxxxxxxx_K_Txxxxxxxxx
P02340	369	K	xxxxxxxxxx_K_Kxxxxxxxxx
P02340	370	K	xxxxxxxxxx_K_Gxxxxxxxxx
P02340	316	K	xxxxxxxxxx_K_Kxxxxxxxxx
P02340	317	K	xxxxxxxxxx_K_Kxxxxxxxxx
P02340	161	K	xxxxxxxxxx_K_Kxxxxxxxxx
P02340	162	K	xxxxxxxxxK_K_Sxxxxxxxxx
P02340	302	K	xxxxxxxxxx_K_Rxxxxxxxxx
P02340	378	K	xxxxxxxxxx_K_Kxxxxxxxxx
P02340	379	K	xxxxxxxxxx_K_Txxxxxxxxx
P02340	383	K	xxxxxxxxxx_K_Kxxxxxxxxx
P02340	328	K	xxxxxxxxxx_K_xxxxKxxxxx
P02340	117	K	xxxxxxxxxx_K_Sxxxxxxxxx
P02468	295	K	xxxxxxxxxx_K_NExxxxxxxx
P03930	48	K	xxxxxxxxxx_K_Txxxxxxxxx
P03958	331	K	xxxxxxxxxx_K_Sxxxxxxxxx
P03975	439	K	xxxxxxxxxx_K_TDxxxxxxxx
P04627	350	K	xxxxxxxxxx_K_NExxxxxxxx
P05064	330	K	xxxxxxxxxx_K_Rxxxxxxxxx
P05064	42	K	xxxxxxxxxx_K_Rxxxxxxxxx
P05064	13	K	xxxxxxxxxx_K_Kxxxxxxxxx
P05064	200	K	xxxxxxxxxx_K_Rxxxxxxxxx
P68181	62	K	xxxxxxxxxx_K_Hxxxxxxxxx
P05201	396	K	xxxxxxxxxx_K_Nxxxxxxxxx
P05202	90	K	xxxxxxxxxx_K_Nxxxxxxxxx
P05202	122	K	xxxxxxxxxx_K_Sxxxxxxxxx
P05202	73	K	xxxxxxxxxG_K_Pxxxxxxxxx
P05202	404	K	xxxxxxxxxx_K_Dxxxxxxxxx
P05202	234	K	xxxxxxxxxx_K_Kxxxxxxxxx
P05202	279	K	xxxxxxxxxx_K_Nxxxxxxxxx
P05202	345	K	xxxxxxxxxx_K_Gxxxxxxxxx
P05202	396	K	xxxxxxxxxT_K_xxxxxxxxxx
P05202	363	K	xxxxxxxxxx_K_Kxxxxxxxxx
P05202	296	K	xxxxxxxxxx_K_Dxxxxxxxxx
P05202	185	K	xxxxxxxxxx_K_Txxxxxxxxx
P05213	336	K	xxxxxxxxxx_K_Txxxxxxxxx
P05213	394	K	xxxxxxxxxx_K_xDxxxxxxxx
P05213	163	K	xxxxxxxxxG_K_Kxxxxxxxxx
P05213	60	K	xxxxxxxxxx_K_Hxxxxxxxxx
P05480	208	K	xxxxxxxxxx_K_Hxxxxxxxxx
P05480	240	K	xxxxxxxxxx_K_Hxxxxxxxxx
P05533	70	K	xxxxxxxxxx_K_NNxxxxxxxx
P06151	81	K	xxxxxxxxxx_K_Dxxxxxxxxx
P06745	142	K	xxxxxxxxxx_K_Gxxxxxxxxx
P06869	332	K	xxxxxxxxxP_K_Nxxxxxxxxx
P07356	47	K	xxxxxxxxxx_K_Txxxxxxxxx
P07356	204	K	xxxxxxxxxx_K_Rxxxxxxxxx
P07356	152	K	xxxxxxxxxx_K_TDxxxxxxxx
P07356	157	K	xxxxxxxxxx_K_Dxxxxxxxxx
P07356	313	K	xxxxxxxxxG_K_Sxxxxxxxxx
P07356	324	K	xxxxxxxxxx_K_xDxxxxxxxx
P07356	279	K	xxxxxxxxxx_K_Gxxxxxxxxx
P07356	245	K	xxxxxxxxxx_K_Kxxxxxxxxx
P07356	233	K	xxxxxxxxxx_K_Sxxxxxxxxx
P11499	107	K	xxxxxxxxxx_K_Sxxxxxxxxx
P07901	436	K	xxxxxxxxxx_K_Kxxxxxxxxx
P07901	540	K	xxxxxxxxxG_K_Txxxxxxxxx
P11499	551	K	xxxxxxxxxx_K_Kxxxxxxxxx
P11499	399	K	xxxxxxxxxS_K_xxxxxxxxxx
P07901	490	K	xxxxxxxxxx_K_Hxxxxxxxxx
P11499	180	K	xxxxxxxxxT_K_Vxxxxxxxxx
P11499	186	K	xxxxxxxxxx_K_xDxxxxxxxx
P07901	633	K	xxxxxxxxxx_K_Hxxxxxxxxx
P07901	209	K	xxxxxxxxxx_K_Hxxxxxxxxx
P07901	315	K	xxxxxxxxxx_K_Sxxxxxxxxx
P07901	153	K	xxxxxxxxxx_K_Hxxxxxxxxx
P07901	479	K	xxxxxxxxxx_K_Dxxxxxxxxx
P07903	97	K	xxxxxxxxxx_K_Sxxxxxxxxx
P08003	477	K	xxxxxxxxxG_K_Kxxxxxxxxx
P08003	384	K	xxxxxxxxxx_K_Hxxxxxxxxx
P08003	630	K	xxxxxxxxxx_K_Rxxxxxxxxx
P08152	411	K	xxxxxxxxxx_K_Rxxxxxxxxx
P08152	415	K	xxxxxxxxxT_K_xxxxxxxxxx
P08113	671	K	xxxxxxxxxx_K_Dxxxxxxxxx
P08113	265	K	xxxxxxxxxx_K_Nxxxxxxxxx
P08113	161	K	xxxxxxxxxV_K_Nxxxxxxxxx
P08113	168	K	xxxxxxxxxx_K_Sxxxxxxxxx
P08113	142	K	xxxxxxxxxx_K_Nxxxxxxxxx
P08113	404	K	xxxxxxxxxx_K_Kxxxxxxxxx
P08113	214	K	xxxxxxxxxx_K_Hxxxxxxxxx
P08207	47	K	xxxxxxxxxx_K_Dxxxxxxxxx
P08207	57	K	xxxxxxxxxx_K_Dxxxxxxxxx
P08207	23	K	xxxxxxxxxx_K_Dxxxxxxxxx
P08207	28	K	xxxxxxxxxx_K_xDxxxxxxxx
P08228	92	K	xxxxxxxxxx_K_Dxxxxxxxxx
P08249	185	K	xxxxxxxxxx_K_Gxxxxxxxxx
P08249	78	K	xxxxxxxxxx_K_Gxxxxxxxxx
P08249	296	K	xxxxxxxxxG_K_Kxxxxxxxxx
P08249	335	K	xxxxxxxxxV_K_Nxxxxxxxxx
P08249	301	K	xxxxxxxxxx_K_Nxxxxxxxxx
P08249	307	K	xxxxxxxxxG_K_xxxxxxxxxx
P08249	329	K	xxxxxxxxxx_K_Gxxxxxxxxx
P08249	157	K	xxxxxxxxxx_K_HxxxxxxKxx
P08249	215	K	xxxxxxxxxx_K_VDxxxxxxxx
P08414	370	K	xxxxxxxxxG_K_Kxxxxxxxxx
P08556	135	K	xxxxxxxxxx_K_Sxxxxxxxxx
P08775	767	K	xxxxxxxxxx_K_Sxxxxxxxxx
P08775	619	K	xxxxxxxxxx_K_HxxxxxxKxx
P09023	51	K	xxxxxxxxxx_K_Gxxxxxxxxx
P09055	71	K	xxxxxxxxxx_K_Kxxxxxxxxx
P09055	624	K	xxxxxxxxDx_K_xxxxxxxxxx
P09055	398	K	xxxxxxxxxx_K_Sxxxxxxxxx
P09055	784	K	xxxxxxxxxx_K_Sxxxxxxxxx
P09103	108	K	xxxxxxxxxF_K_Nxxxxxxxxx
P09103	33	K	xxxxxxxxxK_K_Sxxxxxxxxx
P09103	83	K	xxxxxxxxxx_K_VDxxxxxxxx
P09103	328	K	xxxxxxxxxT_K_xxxxxxxxxx
P09103	330	K	xxxxxxxxxY_K_xxxxxxxxxx
P09103	273	K	xxxxxxxxDx_K_xxxxxxxxxx
P09103	265	K	xxxxxxxxxx_K_Sxxxxxxxxx
P09103	387	K	xxxxxxxxxx_K_Kxxxxxxxxx
P09103	202	K	xxxxxxxxxx_K_Dxxxxxxxxx
P09405	79	K	xxxxxxxxxA_K_Kxxxxxxxxx
P09405	87	K	xxxxxxxxxG_K_Kxxxxxxxxx
P09405	9	K	xxxxxxxxxG_K_Txxxxxxxxx
P09405	15	K	xxxxxxxxxA_K_Kxxxxxxxxx
P09405	124	K	xxxxxxxxxG_K_Kxxxxxxxxx
P09405	522	K	xxxxxxxxxG_K_Pxxxxxxxxx
P09405	95	K	xxxxxxxxxA_K_Kxxxxxxxxx
P09405	96	K	xxxxxxxxxx_K_Nxxxxxxxxx
P09405	636	K	xxxxxxxxxN_K_Vxxxxxxxxx
P09405	607	K	xxxxxxxxxx_K_Gxxxxxxxxx
P09405	621	K	xxxxxxxxDx_K_xxxxxxxxxx
P09405	335	K	xxxxxxxxxx_K_NDxxxxxxxx
P09405	132	K	xxxxxxxxxx_K_Gxxxxxxxxx
P09405	135	K	xxxxxxxxxx_K_Nxxxxxxxxx
P09405	138	K	xxxxxxxxxx_K_Nxxxxxxxxx
P09405	439	K	xxxxxxxxxx_K_Sxxxxxxxxx
P09405	62	K	xxxxxxxxxA_K_Kxxxxxxxxx
P09405	109	K	xxxxxxxxxG_K_Kxxxxxxxxx
P09405	70	K	xxxxxxxxxx_K_Kxxxxxxxxx
P09405	429	K	xxxxxxxxxG_K_Sxxxxxxxxx
P09405	431	K	xxxxxxxxxx_K_Gxxxxxxxxx
P09405	569	K	xxxxxxxxxx_K_Txxxxxxxxx
P09405	574	K	xxxxxxxxxx_K_Gxxxxxxxxx
P09405	478	K	xxxxxxxxxG_K_Txxxxxxxxx
P09405	400	K	xxxxxxxxxx_K_Nxxxxxxxxx
P09411	131	K	xxxxxxxxxG_K_Gxxxxxxxxx
P09411	353	K	xxxxxxxxxx_K_Sxxxxxxxxx
P09411	291	K	xxxxxxxxxx_K_xDxxxxxxxx
P09411	30	K	xxxxxxxxxx_K_NNxxxxxxxx
P09411	388	K	xxxxxxxxxD_K_Vxxxxxxxxx
P09602	11	K	xxxxxxxxxx_K_xDxxxxxxxx
P09671	108	K	xxxxxxxxxx_K_Gxxxxxxxxx
P09671	114	K	xxxxxxxxxx_K_Gxxxxxxxxx
P09671	122	K	xxxxxxxxxx_K_Rxxxxxxxxx
P09671	75	K	xxxxxxxxxx_K_xDxxxxxxxx
P0C0S6	5	K	xxxxxxxxxG_K_xxxxxxxxxx
P0C0S6	8	K	xxxxxxxxxx_K_Dxxxxxxxxx
P0C0S6	12	K	xxxxxxxxxG_K_xxxxxxxxxx
P0DP28	22	K	xxxxxxxxxx_K_Dxxxxxxxxx
P0DP28	95	K	xxxxxxxxxx_K_Dxxxxxxxxx
P10107	26	K	xxxxxxxxxx_K_Sxxxxxxxxx
P10107	29	K	xxxxxxxxxx_K_Gxxxxxxxxx
P10107	312	K	xxxxxxxxxx_K_xxxxKxxxxx
P10107	317	K	xxxxxxxxxx_K_Kxxxxxxxxx
P10107	242	K	xxxxxxxxxG_K_xxxxxxxKxx
P10126	5	K	xxxxxxxxxx_K_Txxxxxxxxx
P10126	179	K	xxxxxxxxxx_K_Kxxxxxxxxx
P10126	165	K	xxxxxxxxxx_K_Rxxxxxxxxx
P10126	154	K	xxxxxxxxxx_K_xDxxxxxxxx
P10605	220	K	xxxxxxxxxx_K_xDxxxxxxxx
Q91VC3	289	K	xxxxxxxxxx_K_VDxxxxxxxx
P10852	184	K	xxxxxxxxxx_K_Dxxxxxxxxx
Q6ZWY9	21	K	xxxxxxxxxT_K_xxxxxxxxxx
Q6ZWY9	24	K	xxxxxxxxxx_K_Kxxxxxxxxx
Q6ZWY9	25	K	xxxxxxxxxx_K_Dxxxxxxxxx
Q6ZWY9	44	K	xxxxxxxxxY_K_xxxxxxxxxx
P10854	16	K	xxxxxxxxxx_K_Kxxxxxxxxx
Q6ZWY9	117	K	xxxxxxxxxT_K_xxxxxxxxxx
P10854	13	K	xxxxxxxxxx_K_Gxxxxxxxxx
Q6ZWY9	86	K	xxxxxxxxxx_K_Rxxxxxxxxx
Q6ZWY9	109	K	xxxxxxxxxx_K_HxxxxxxKxx
P10854	6	K	xxxxxxxxxx_K_Sxxxxxxxxx
P10854	12	K	xxxxxxxxxx_K_Kxxxxxxxxx
P43274	192	K	xxxxxxxxxx_K_Txxxxxxxxx
P10922	21	K	xxxxxxxxxK_K_Sxxxxxxxxx
P10922	59	K	xxxxxxxxxY_K_xxxxxxxxxx
P10922	55	K	xxxxxxxxxx_K_Sxxxxxxxxx
P10922	40	K	xxxxxxxxxx_K_Nxxxxxxxxx
P11031	80	K	xxxxxxxxxG_K_xxxxxxxxxx
P11031	5	K	xxxxxxxxxS_K_xxxxxxxxxx
P11103	305	K	xxxxxxxxxx_K_Sxxxxxxxxx
P11103	818	K	xxxxxxxxxV_K_Nxxxxxxxxx
P11276	2080	K	xxxxxxxxxx_K_TDxxxxxxxx
P11276	58	K	xxxxxxxxxx_K_Hxxxxxxxxx
P11276	1629	K	xxxxxxxxxx_K_Txxxxxxxxx
P11276	397	K	xxxxxxxxDx_K_xxxxxxxxxx
P11276	1927	K	xxxxxxxxxx_K_Txxxxxxxxx
P11440	238	K	xxxxxxxxxY_K_Nxxxxxxxxx
P11440	295	K	xxxxxxxxxx_K_Kxxxxxxxxx
P11440	283	K	xxxxxxxxxx_K_Hxxxxxxxxx
P11440	33	K	xxxxxxxxxx_K_Kxxxxxxxxx
P11499	347	K	xxxxxxxxxx_K_Kxxxxxxxxx
P11499	624	K	xxxxxxxxxx_K_Hxxxxxxxxx
P11499	204	K	xxxxxxxxxx_K_Hxxxxxxxxx
P11499	491	K	xxxxxxxxxS_K_xxxxxxxxxx
P11499	148	K	xxxxxxxxxx_K_Hxxxxxxxxx
P11983	317	K	xxxxxxxxxx_K_Hxxxxxxxxx
P11983	365	K	xxxxxxxxxx_K_Nxxxxxxxxx
P11983	538	K	xxxxxxxxxx_K_Dxxxxxxxxx
P11983	400	K	xxxxxxxxxx_K_Rxxxxxxxxx
P11983	494	K	xxxxxxxxxG_K_Pxxxxxxxxx
P12367	158	K	xxxxxxxxxx_K_TDxxxxxxxx
P12367	132	K	xxxxxxxxxx_K_Dxxxxxxxxx
P12382	677	K	xxxxxxxxxT_K_xxxxxxxxxx
P12382	726	K	xxxxxxxxxx_K_Kxxxxxxxxx
P12787	109	K	xxxxxxxxxx_K_Dxxxxxxxxx
P12970	197	K	xxxxxxxxxx_K_Txxxxxxxxx
P12970	37	K	xxxxxxxxxP_K_Nxxxxxxxxx
P12970	34	K	xxxxxxxxxx_K_Rxxxxxxxxx
P13011	36	K	xxxxxxxxxx_K_Sxxxxxxxxx
P13020	582	K	xxxxxxxxxx_K_Sxxxxxxxxx
P13439	219	K	xxxxxxxxxx_K_Kxxxxxxxxx
P13595	121	K	xxxxxxxxxF_K_Nxxxxxxxxx
P13808	1143	K	xxxxxxxxxx_K_Hxxxxxxxxx
P13864	348	K	xxxxxxxxxx_K_Sxxxxxxxxx
P13864	1122	K	xxxxxxxxxG_K_Gxxxxxxxxx
P13864	1124	K	xxxxxxxxxx_K_Hxxxxxxxxx
P13864	1466	K	xxxxxxxxxV_K_Nxxxxxxxxx
P13864	961	K	xxxxxxxxxx_K_Rxxxxxxxxx
P14094	118	K	xxxxxxxxxx_K_Dxxxxxxxxx
P14115	94	K	xxxxxxxxxx_K_Txxxxxxxxx
P14148	183	K	xxxxxxxxxG_K_xxxxxxxxxx
P14148	245	K	xxxxxxxxxx_K_Txxxxxxxxx
P14148	27	K	xxxxxxxxxx_K_Txxxxxxxxx
P14152	110	K	xxxxxxxxxx_K_Sxxxxxxxxx
P14152	179	K	xxxxxxxxxV_K_Nxxxxxxxxx
P14211	224	K	xxxxxxxxxx_K_xDxxxxxxxx
P14211	164	K	xxxxxxxxxx_K_Dxxxxxxxxx
P14211	64	K	xxxxxxxxxx_K_Gxxxxxxxxx
P14211	142	K	xxxxxxxxxx_K_Kxxxxxxxxx
P14211	62	K	xxxxxxxxxx_K_Dxxxxxxxxx
P14211	43	K	xxxxxxxxxx_K_Sxxxxxxxxx
P14211	375	K	xxxxxxxxxx_K_Rxxxxxxxxx
P14211	159	K	xxxxxxxxxx_K_Dxxxxxxxxx
P14576	57	K	xxxxxxxxxx_K_Sxxxxxxxxx
P14602	202	K	xxxxxxxxxG_K_Sxxxxxxxxx
P14602	127	K	xxxxxxxxxx_K_Hxxxxxxxxx
P14733	124	K	xxxxxxxxxA_K_Kxxxxxxxxx
P14733	146	K	xxxxxxxxxx_K_Dxxxxxxxxx
P14733	458	K	xxxxxxxxxL_K_Nxxxxxxxxx
P14733	262	K	xxxxxxxxxY_K_xxxxxxxxxx
P14733	533	K	xxxxxxxxxL_K_Nxxxxxxxxx
P14824	370	K	xxxxxxxxDx_K_xxxxxxxxxx
P14824	306	K	xxxxxxxxxx_K_NDxxxxxxxx
P14824	579	K	xxxxxxxxxx_K_Kxxxxxxxxx
P15208	148	K	xxxxxxxxxx_K_NNxxxxxxxx
Q01768	26	K	xxxxxxxxxx_K_Rxxxxxxxxx
P15532	124	K	xxxxxxxxxx_K_Sxxxxxxxxx
P15620	223	K	xxxxxxxxxx_K_Hxxxxxxxxx
P15806	102	K	xxxxxxxxxG_K_Gxxxxxxxxx
P43277	76	K	xxxxxxxxxx_K_NNxxxxxxxx
P43277	47	K	xxxxxxxxxT_K_xxxxxxxxxx
P15864	168	K	xxxxxxxxxx_K_Kxxxxxxxxx
P43277	64	K	xxxxxxxxxx_K_Kxxxxxxxxx
P16045	64	K	xxxxxxxxxx_K_xDxxxxxxxx
P16045	29	K	xxxxxxxxxx_K_Sxxxxxxxxx
P16110	190	K	xxxxxxxxxx_K_xDxxxxxxxx
P16254	43	K	xxxxxxxxxx_K_Sxxxxxxxxx
P16330	163	K	xxxxxxxxxx_K_Nxxxxxxxxx
P16332	338	K	xxxxxxxxxP_K_Nxxxxxxxxx
P16546	2426	K	xxxxxxxxxT_K_xxxxxxxxxx
P16546	1288	K	xxxxxxxxxD_K_Vxxxxxxxxx
P16546	920	K	xxxxxxxxxx_K_Dxxxxxxxxx
P16546	814	K	xxxxxxxxxx_K_Dxxxxxxxxx
P16546	1591	K	xxxxxxxxxx_K_Hxxxxxxxxx
P16546	1911	K	xxxxxxxxxx_K_Hxxxxxxxxx
P16546	931	K	xxxxxxxxxx_K_Hxxxxxxxxx
P16546	1486	K	xxxxxxxxxx_K_Hxxxxxxxxx
P16546	508	K	xxxxxxxxxx_K_Hxxxxxxxxx
P16546	1274	K	xxxxxxxxxx_K_Hxxxxxxxxx
P16546	296	K	xxxxxxxxxx_K_Hxxxxxxxxx
P16546	825	K	xxxxxxxxxx_K_Hxxxxxxxxx
P16546	1699	K	xxxxxxxxxx_K_Hxxxxxxxxx
P16546	1311	K	xxxxxxxxDx_K_xxxxxxxxxx
P16546	84	K	xxxxxxxxxx_K_Hxxxxxxxxx
P16546	1588	K	xxxxxxxxxx_K_Hxxxxxxxxx
P16546	73	K	xxxxxxxxxx_K_Dxxxxxxxxx
P16546	756	K	xxxxxxxxxx_K_Kxxxxxxxxx
P16546	613	K	xxxxxxxxxx_K_Hxxxxxxxxx
P16675	264	K	xxxxxxxxxG_K_Sxxxxxxxxx
P16858	217	K	xxxxxxxxxG_K_xxxxxxxKxx
P16858	252	K	xxxxxxxxxx_K_xDxxxxxxxx
P16858	192	K	xxxxxxxxxG_K_xxxxxxxxxx
P16951	87	K	xxxxxxxxxx_K_Kxxxxxxxxx
P16951	30	K	xxxxxxxxxx_K_Hxxxxxxxxx
P16951	104	K	xxxxxxxxxS_K_xxxxxxxxxx
P17012	489	K	xxxxxxxxxx_K_Hxxxxxxxxx
P17012	447	K	xxxxxxxxxA_K_Kxxxxxxxxx
P17047	294	K	xxxxxxxxxx_K_NExxxxxxxx
P17095	7	K	xxxxxxxxxx_K_Sxxxxxxxxx
P17095	15	K	xxxxxxxxxS_K_xxxxxxxxxx
P63017	451	K	xxxxxxxxxx_K_Dxxxxxxxxx
P63017	507	K	xxxxxxxxxx_K_Gxxxxxxxxx
P63017	187	K	xxxxxxxxxx_K_Kxxxxxxxxx
P17156	89	K	xxxxxxxxxx_K_Hxxxxxxxxx
P17156	542	K	xxxxxxxxxx_K_Nxxxxxxxxx
P17182	60	K	xxxxxxxxxG_K_Gxxxxxxxxx
P17182	71	K	xxxxxxxxxx_K_Txxxxxxxxx
P17182	80	K	xxxxxxxxxx_K_Kxxxxxxxxx
P17182	193	K	xxxxxxxxxL_K_Nxxxxxxxxx
P17182	202	K	xxxxxxxxxx_K_Dxxxxxxxxx
P17225	217	K	xxxxxxxxxx_K_NNxxxxxxxx
P17225	478	K	xxxxxxxxxx_K_Gxxxxxxxxx
P17426	55	K	xxxxxxxxxx_K_Kxxxxxxxxx
P17426	117	K	xxxxxxxxxx_K_NDxxxxxxxx
P17426	177	K	xxxxxxxxxY_K_xxxxxxxxxx
P17427	569	K	xxxxxxxxxL_K_Nxxxxxxxxx
P17665	25	K	xxxxxxxxxx_K_Nxxxxxxxxx
P17742	44	K	xxxxxxxxxx_K_Gxxxxxxxxx
P17742	91	K	xxxxxxxxxx_K_Hxxxxxxxxx
P17742	118	K	xxxxxxxxxx_K_Txxxxxxxxx
P17742	125	K	xxxxxxxxxx_K_HxxxxxxKxx
P17742	131	K	xxxxxxxxxG_K_xxxxxxxxxx
P17742	31	K	xxxxxxxxxx_K_Txxxxxxxxx
P17751	194	K	xxxxxxxxxx_K_Sxxxxxxxxx
P17751	156	K	xxxxxxxxxx_K_Dxxxxxxxxx
P17751	175	K	xxxxxxxxxG_K_Txxxxxxxxx
Q61696	3	K	xxxxxxxxxx_K_Nxxxxxxxxx
Q61696	507	K	xxxxxxxxxx_K_Gxxxxxxxxx
Q61696	88	K	xxxxxxxxxx_K_Hxxxxxxxxx
Q61696	56	K	xxxxxxxxxx_K_Nxxxxxxxxx
Q61696	539	K	xxxxxxxxxx_K_Nxxxxxxxxx
P17918	164	K	xxxxxxxxxx_K_Nxxxxxxxxx
P18155	152	K	xxxxxxxxxx_K_Dxxxxxxxxx
P18155	299	K	xxxxxxxxxx_K_Kxxxxxxxxx
P18572	354	K	xxxxxxxxxx_K_xDxxxxxxxx
P18760	44	K	xxxxxxxxxx_K_Kxxxxxxxxx
P18760	45	K	xxxxxxxxxx_K_Nxxxxxxxxx
P18760	144	K	xxxxxxxxxx_K_Dxxxxxxxxx
P18760	132	K	xxxxxxxxxx_K_Hxxxxxxxxx
P18760	22	K	xxxxxxxxxx_K_Sxxxxxxxxx
P18760	121	K	xxxxxxxxxx_K_Dxxxxxxxxx
P18760	78	K	xxxxxxxxxx_K_Dxxxxxxxxx
P19096	2442	K	xxxxxxxxxx_K_Txxxxxxxxx
P19096	790	K	xxxxxxxxxx_K_Dxxxxxxxxx
P19096	1491	K	xxxxxxxxxx_K_Hxxxxxxxxx
P19096	2399	K	xxxxxxxxxx_K_Sxxxxxxxxx
P19096	1697	K	xxxxxxxxxx_K_Rxxxxxxxxx
P19096	1840	K	xxxxxxxxxx_K_Hxxxxxxxxx
P19157	209	K	xxxxxxxxxG_K_xxxxxxxxxx
P19157	116	K	xxxxxxxxxx_K_NDxxxxxxxx
P19258	82	K	xxxxxxxxxT_K_Vxxxxxxxxx
P19324	286	K	xxxxxxxxxT_K_xxxxxxxxxx
P19324	159	K	xxxxxxxxxS_K_xxxxxxxxxx
P19324	249	K	xxxxxxxxDx_K_xxxxxxxxxx
P19536	73	K	xxxxxxxxxx_K_xDxxxxxxxx
P19536	85	K	xxxxxxxxxx_K_Rxxxxxxxxx
P19783	29	K	xxxxxxxxxx_K_Sxxxxxxxxx
P19783	67	K	xxxxxxxxxx_K_xDxxxxxxxx
P20029	164	K	xxxxxxxxxG_K_Kxxxxxxxxx
P20029	618	K	xxxxxxxxDx_K_xxxxxxxxxx
P20029	354	K	xxxxxxxxxK_K_Sxxxxxxxxx
P20029	448	K	xxxxxxxxxK_K_Sxxxxxxxxx
P20029	124	K	xxxxxxxxxx_K_Txxxxxxxxx
P20029	82	K	xxxxxxxxxx_K_Nxxxxxxxxx
P20029	97	K	xxxxxxxxxx_K_Rxxxxxxxxx
P20029	574	K	xxxxxxxxxL_K_Nxxxxxxxxx
P20029	353	K	xxxxxxxxxx_K_Kxxxxxxxxx
P20108	92	K	xxxxxxxxxx_K_Gxxxxxxxxx
P20108	197	K	xxxxxxxxxx_K_Hxxxxxxxxx
P20152	235	K	xxxxxxxxxx_K_Kxxxxxxxxx
P20152	282	K	xxxxxxxxxx_K_Nxxxxxxxxx
P58771	76	K	xxxxxxxxxx_K_Kxxxxxxxxx
P58771	217	K	xxxxxxxxxx_K_xDxxxxxxxx
P21271	1553	K	xxxxxxxxxL_K_Nxxxxxxxxx
P21278	72	K	xxxxxxxxxx_K_Rxxxxxxxxx
P21619	465	K	xxxxxxxxxL_K_Nxxxxxxxxx
P21995	228	K	xxxxxxxxxx_K_Hxxxxxxxxx
P22518	297	K	xxxxxxxxxx_K_Sxxxxxxxxx
P23116	559	K	xxxxxxxxxL_K_Nxxxxxxxxx
P23116	75	K	xxxxxxxxxY_K_Nxxxxxxxxx
P23116	632	K	xxxxxxxxxx_K_Kxxxxxxxxx
P23198	5	K	xxxxxxxxxx_K_Txxxxxxxxx
P23198	44	K	xxxxxxxxxG_K_xxxxxxxKxx
P23198	143	K	xxxxxxxxxx_K_Dxxxxxxxxx
P23475	98	K	xxxxxxxxxF_K_Nxxxxxxxxx
P23506	4	K	xxxxxxxxxx_K_Sxxxxxxxxx
P23591	89	K	xxxxxxxxxx_K_Nxxxxxxxxx
P23798	192	K	xxxxxxxxxY_K_xxxxxxxxxx
P23804	361	K	xxxxxxxxxG_K_Kxxxxxxxxx
P23927	103	K	xxxxxxxxxx_K_Hxxxxxxxxx
P24270	480	K	xxxxxxxxxV_K_Nxxxxxxxxx
P24270	476	K	xxxxxxxxxx_K_Kxxxxxxxxx
P24270	237	K	xxxxxxxxxx_K_TDxxxxxxxx
P24270	430	K	xxxxxxxxxx_K_Rxxxxxxxxx
P24270	449	K	xxxxxxxxxT_K_Vxxxxxxxxx
P24270	105	K	xxxxxxxxxx_K_Rxxxxxxxxx
P24369	158	K	xxxxxxxxxx_K_Txxxxxxxxx
P24369	165	K	xxxxxxxxxx_K_Hxxxxxxxxx
P24369	116	K	xxxxxxxxxG_K_Sxxxxxxxxx
P24369	171	K	xxxxxxxxxG_K_xxxxxxxxxx
P24369	186	K	xxxxxxxxxx_K_TDxxxxxxxx
P24369	131	K	xxxxxxxxxx_K_Hxxxxxxxxx
P24547	257	K	xxxxxxxxDx_K_xxxxxxxxxx
P24788	120	K	xxxxxxxxxx_K_Hxxxxxxxxx
P24788	20	K	xxxxxxxxxx_K_Kxxxxxxxxx
P25206	556	K	xxxxxxxxxx_K_Kxxxxxxxxx
P25206	547	K	xxxxxxxxxx_K_Hxxxxxxxxx
P25206	248	K	xxxxxxxxxx_K_Gxxxxxxxxx
P25206	697	K	xxxxxxxxxx_K_Dxxxxxxxxx
P25444	263	K	xxxxxxxxxx_K_Sxxxxxxxxx
P25444	275	K	xxxxxxxxxx_K_Txxxxxxxxx
P25444	211	K	xxxxxxxxxx_K_Kxxxxxxxxx
P25911	181	K	xxxxxxxxxx_K_Hxxxxxxxxx
P25976	266	K	xxxxxxxxxx_K_Hxxxxxxxxx
P25976	279	K	xxxxxxxxxx_K_Sxxxxxxxxx
P25976	652	K	xxxxxxxxxx_K_Rxxxxxxxxx
P25976	284	K	xxxxxxxxxT_K_xxxxxxxxxx
P25976	211	K	xxxxxxxxxx_K_Kxxxxxxxxx
P26039	254	K	xxxxxxxxxx_K_Hxxxxxxxxx
P26039	284	K	xxxxxxxxxx_K_Nxxxxxxxxx
P26041	262	K	xxxxxxxxxx_K_Kxxxxxxxxx
P26041	296	K	xxxxxxxxxx_K_xDxxxxxxxx
P26041	412	K	xxxxxxxxxx_K_Txxxxxxxxx
P26041	165	K	xxxxxxxxxx_K_Dxxxxxxxxx
P26043	400	K	xxxxxxxxxx_K_Sxxxxxxxxx
P26043	435	K	xxxxxxxxxA_K_Kxxxxxxxxx
P26231	795	K	xxxxxxxxxS_K_xxxxxxxxxx
P26231	889	K	xxxxxxxxxx_K_Hxxxxxxxxx
P26231	747	K	xxxxxxxxxA_K_Kxxxxxxxxx
P26231	120	K	xxxxxxxxxx_K_Rxxxxxxxxx
P26443	346	K	xxxxxxxxDx_K_xxxxxxxxxx
P26443	480	K	xxxxxxxxxx_K_Hxxxxxxxxx
P26443	90	K	xxxxxxxxxx_K_Txxxxxxxxx
P26443	191	K	xxxxxxxxxP_K_Nxxxxxxxxx
P26443	503	K	xxxxxxxxxx_K_Dxxxxxxxxx
P26443	390	K	xxxxxxxxxx_K_Sxxxxxxxxx
P26516	103	K	xxxxxxxxxx_K_NDxxxxxxxx
P26883	53	K	xxxxxxxxxG_K_xxxxxxxxxx
P27046	190	K	xxxxxxxxxx_K_Txxxxxxxxx
P27048	36	K	xxxxxxxxxD_K_Hxxxxxxxxx
P27577	15	K	xxxxxxxxxx_K_Txxxxxxxxx
P27577	245	K	xxxxxxxxxG_K_xxxxxxxxxx
P27601	363	K	xxxxxxxxxx_K_Dxxxxxxxxx
P27641	566	K	xxxxxxxxxA_K_Kxxxxxxxxx
P27659	393	K	xxxxxxxxxx_K_Kxxxxxxxxx
P27659	120	K	xxxxxxxxxY_K_Nxxxxxxxxx
P27659	229	K	xxxxxxxxxx_K_Gxxxxxxxxx
P27659	366	K	xxxxxxxxDx_K_xxxxxxxxxx
P27659	349	K	xxxxxxxxxx_K_Sxxxxxxxxx
P27659	143	K	xxxxxxxxxG_K_Kxxxxxxxxx
P27659	300	K	xxxxxxxxxx_K_NNxxxxxxxx
P27659	103	K	xxxxxxxxxx_K_Txxxxxxxxx
P27659	115	K	xxxxxxxxxx_K_Rxxxxxxxxx
P27661	134	K	xxxxxxxxxG_K_Kxxxxxxxxx
P27661	37	K	xxxxxxxxxx_K_Gxxxxxxxxx
P27661	120	K	xxxxxxxxxK_K_Sxxxxxxxxx
P27773	271	K	xxxxxxxxxx_K_Nxxxxxxxxx
P27773	274	K	xxxxxxxxxx_K_Gxxxxxxxxx
P27773	494	K	xxxxxxxxxx_K_xxxxKxxxxx
P27773	496	K	xxxxxxxxxx_K_Kxxxxxxxxx
P27773	218	K	xxxxxxxxxx_K_Txxxxxxxxx
P27773	225	K	xxxxxxxxxx_K_Kxxxxxxxxx
P27773	252	K	xxxxxxxxxx_K_Dxxxxxxxxx
P27773	152	K	xxxxxxxxxx_K_Dxxxxxxxxx
P27773	82	K	xxxxxxxxxx_K_VDxxxxxxxx
P27773	305	K	xxxxxxxxxx_K_Txxxxxxxxx
P27773	129	K	xxxxxxxxxx_K_Kxxxxxxxxx
P27773	146	K	xxxxxxxxxx_K_Kxxxxxxxxx
P27790	246	K	xxxxxxxxxG_K_Sxxxxxxxxx
P28033	144	K	xxxxxxxxxx_K_Rxxxxxxxxx
P28271	639	K	xxxxxxxxxx_K_Sxxxxxxxxx
P28352	57	K	xxxxxxxxxG_K_Sxxxxxxxxx
P28656	194	K	xxxxxxxxxx_K_HxxxxxxKxx
P28656	82	K	xxxxxxxxxL_K_Nxxxxxxxxx
P28658	56	K	xxxxxxxxxK_K_Sxxxxxxxxx
P28700	369	K	xxxxxxxxxx_K_Txxxxxxxxx
P28704	189	K	xxxxxxxxxx_K_Rxxxxxxxxx
P28740	329	K	xxxxxxxxxx_K_Nxxxxxxxxx
P28740	101	K	xxxxxxxxxx_K_NDxxxxxxxx
P28843	163	K	xxxxxxxxxx_K_NDxxxxxxxx
P29341	108	K	xxxxxxxxxx_K_Sxxxxxxxxx
P29341	104	K	xxxxxxxxxx_K_Nxxxxxxxxx
P29341	606	K	xxxxxxxxxx_K_VDxxxxxxxx
P29341	138	K	xxxxxxxxxx_K_Gxxxxxxxxx
P29341	299	K	xxxxxxxxxV_K_Nxxxxxxxxx
P29595	48	K	xxxxxxxxxG_K_xxxxxxxxxx
P29595	6	K	xxxxxxxxxx_K_Txxxxxxxxx
P29758	386	K	xxxxxxxxxx_K_Dxxxxxxxxx
P29758	66	K	xxxxxxxxxG_K_Gxxxxxxxxx
P29758	32	K	xxxxxxxxxx_K_Txxxxxxxxx
P29758	421	K	xxxxxxxxxx_K_xDxxxxxxxx
P30415	942	K	xxxxxxxxxx_K_Sxxxxxxxxx
P30415	637	K	xxxxxxxxxx_K_Txxxxxxxxx
P30415	664	K	xxxxxxxxxx_K_Rxxxxxxxxx
P30415	983	K	xxxxxxxxxx_K_Rxxxxxxxxx
P30415	871	K	xxxxxxxxxx_K_Nxxxxxxxxx
P30415	877	K	xxxxxxxxxx_K_xDxxxxxxxx
P30415	51	K	xxxxxxxxxG_K_Txxxxxxxxx
P30415	974	K	xxxxxxxxxx_K_Dxxxxxxxxx
P30415	1262	K	xxxxxxxxxN_K_Vxxxxxxxxx
P30415	1202	K	xxxxxxxxxG_K_Kxxxxxxxxx
P30415	769	K	xxxxxxxxxx_K_Rxxxxxxxxx
P30415	179	K	xxxxxxxxxT_K_xxxxxxxxxx
P30416	354	K	xxxxxxxxxx_K_Gxxxxxxxxx
P30416	287	K	xxxxxxxxxY_K_xxxxxxxxxx
P30681	65	K	xxxxxxxxxx_K_Sxxxxxxxxx
P30681	127	K	xxxxxxxxxA_K_Kxxxxxxxxx
P30681	30	K	xxxxxxxxxx_K_Hxxxxxxxxx
P30681	50	K	xxxxxxxxxx_K_Txxxxxxxxx
P30999	433	K	xxxxxxxxxL_K_Nxxxxxxxxx
P30999	448	K	xxxxxxxxxx_K_Nxxxxxxxxx
P30999	846	K	xxxxxxxxxK_K_Sxxxxxxxxx
P30999	383	K	xxxxxxxxxx_K_Sxxxxxxxxx
P30999	622	K	xxxxxxxxxA_K_Kxxxxxxxxx
P31230	165	K	xxxxxxxxxx_K_Hxxxxxxxxx
P31257	195	K	xxxxxxxxxG_K_xxxxxxxKxx
P31266	201	K	xxxxxxxxxL_K_Nxxxxxxxxx
P31786	55	K	xxxxxxxxxx_K_xDxxxxxxxx
P31786	51	K	xxxxxxxxxx_K_Gxxxxxxxxx
P32020	479	K	xxxxxxxxxV_K_Nxxxxxxxxx
P32020	491	K	xxxxxxxxxx_K_Kxxxxxxxxx
P32020	453	K	xxxxxxxxxx_K_Kxxxxxxxxx
P32067	404	K	xxxxxxxxxx_K_Hxxxxxxxxx
P32067	105	K	xxxxxxxxxY_K_Nxxxxxxxxx
P32067	311	K	xxxxxxxxxx_K_xxxxKxxxxx
P32114	97	K	xxxxxxxxxx_K_xxxxKxxxxx
P33174	1081	K	xxxxxxxxxK_K_Sxxxxxxxxx
P33609	230	K	xxxxxxxxxx_K_Rxxxxxxxxx
P33609	277	K	xxxxxxxxxx_K_Txxxxxxxxx
P35235	198	K	xxxxxxxxxx_K_Kxxxxxxxxx
P35235	492	K	xxxxxxxxxx_K_Txxxxxxxxx
P35235	325	K	xxxxxxxxxK_K_Sxxxxxxxxx
P35278	184	K	xxxxxxxxxx_K_NExxxxxxxx
P35279	127	K	xxxxxxxxxx_K_TDxxxxxxxx
P35279	26	K	xxxxxxxxxG_K_Txxxxxxxxx
P35282	45	K	xxxxxxxxxD_K_Hxxxxxxxxx
P35285	97	K	xxxxxxxxxL_K_Nxxxxxxxxx
P35288	132	K	xxxxxxxxxx_K_NExxxxxxxx
P35288	22	K	xxxxxxxxxG_K_Sxxxxxxxxx
P35288	168	K	xxxxxxxxxx_K_Hxxxxxxxxx
P35290	121	K	xxxxxxxxxx_K_Sxxxxxxxxx
P35293	142	K	xxxxxxxxxx_K_Hxxxxxxxxx
P35441	587	K	xxxxxxxxxx_K_Dxxxxxxxxx
P35441	931	K	xxxxxxxxxx_K_Dxxxxxxxxx
P35441	430	K	xxxxxxxxxx_K_Rxxxxxxxxx
P35456	160	K	xxxxxxxxxx_K_Dxxxxxxxxx
P35486	244	K	xxxxxxxxxx_K_Rxxxxxxxxx
P35486	83	K	xxxxxxxxxY_K_xxxxxxxxxx
P35486	158	K	xxxxxxxxxx_K_Nxxxxxxxxx
P35486	77	K	xxxxxxxxxx_K_xDxxxxxxxx
P35486	321	K	xxxxxxxxxx_K_Dxxxxxxxxx
P35486	313	K	xxxxxxxxxx_K_Sxxxxxxxxx
P35550	290	K	xxxxxxxxxx_K_Kxxxxxxxxx
P35550	211	K	xxxxxxxxxA_K_Kxxxxxxxxx
P35550	115	K	xxxxxxxxxx_K_Nxxxxxxxxx
P35550	127	K	xxxxxxxxxx_K_Rxxxxxxxxx
P35550	108	K	xxxxxxxxxx_K_xDxxxxxxxx
P35550	90	K	xxxxxxxxxx_K_Nxxxxxxxxx
P35550	137	K	xxxxxxxxDx_K_xxxxxxxxxx
P35564	128	K	xxxxxxxxxx_K_Hxxxxxxxxx
P35564	301	K	xxxxxxxxxx_K_xDxxxxxxxx
P35564	517	K	xxxxxxxxxx_K_TDxxxxxxxx
P35564	526	K	xxxxxxxxxx_K_Dxxxxxxxxx
P35564	531	K	xxxxxxxxxG_K_xxxxxxxxxx
P35564	171	K	xxxxxxxxxx_K_Txxxxxxxxx
P35564	211	K	xxxxxxxxxx_K_Txxxxxxxxx
P35564	218	K	xxxxxxxxxx_K_Hxxxxxxxxx
P35564	228	K	xxxxxxxxxx_K_Txxxxxxxxx
P35569	315	K	xxxxxxxxxG_K_Pxxxxxxxxx
P35582	284	K	xxxxxxxxxx_K_Gxxxxxxxxx
Q9WVP1	237	K	xxxxxxxxDx_K_xxxxxxxxxx
P35601	622	K	xxxxxxxxxx_K_Dxxxxxxxxx
P35601	93	K	xxxxxxxxxY_K_xxxxxxxxxx
P35700	185	K	xxxxxxxxxx_K_xDxxxxxxxx
P35700	168	K	xxxxxxxxxD_K_Hxxxxxxxxx
P35761	471	K	xxxxxxxxxx_K_NDxxxxxxxx
P35979	54	K	xxxxxxxxxx_K_Gxxxxxxxxx
P35979	99	K	xxxxxxxxxx_K_Hxxxxxxxxx
P35980	164	K	xxxxxxxxxT_K_xxxxxxxxxx
P35980	19	K	xxxxxxxxxx_K_Sxxxxxxxxx
P36552	360	K	xxxxxxxxxx_K_Hxxxxxxxxx
P37040	613	K	xxxxxxxxxx_K_xxxxKxxxxx
P37040	358	K	xxxxxxxxxx_K_Hxxxxxxxxx
P37040	481	K	xxxxxxxxxx_K_Sxxxxxxxxx
P37237	229	K	xxxxxxxxxx_K_Rxxxxxxxxx
P37913	485	K	xxxxxxxxxG_K_Txxxxxxxxx
P37913	218	K	xxxxxxxxxS_K_xxxxxxxxxx
P37913	196	K	xxxxxxxxxx_K_Txxxxxxxxx
P37913	144	K	xxxxxxxxxx_K_Txxxxxxxxx
P38060	137	K	xxxxxxxxxx_K_Nxxxxxxxxx
P38647	377	K	xxxxxxxxxx_K_Sxxxxxxxxx
P38647	360	K	xxxxxxxxxx_K_Rxxxxxxxxx
P38647	563	K	xxxxxxxxxV_K_Nxxxxxxxxx
P38647	138	K	xxxxxxxxxx_K_Nxxxxxxxxx
P38647	555	K	xxxxxxxxxx_K_Dxxxxxxxxx
P38647	187	K	xxxxxxxxxx_K_Nxxxxxxxxx
P38647	300	K	xxxxxxxxxx_K_Dxxxxxxxxx
P38647	468	K	xxxxxxxxxK_K_Sxxxxxxxxx
P38647	600	K	xxxxxxxxxx_K_Dxxxxxxxxx
P38647	206	K	xxxxxxxxxx_K_Dxxxxxxxxx
P38647	135	K	xxxxxxxxxx_K_Dxxxxxxxxx
P38647	234	K	xxxxxxxxxx_K_Sxxxxxxxxx
P39053	315	K	xxxxxxxxxY_K_Nxxxxxxxxx
P39054	315	K	xxxxxxxxxY_K_Nxxxxxxxxx
P39447	9	K	xxxxxxxxxx_K_Sxxxxxxxxx
P39447	539	K	xxxxxxxxxx_K_Gxxxxxxxxx
P39447	194	K	xxxxxxxxxx_K_NExxxxxxxx
P39447	357	K	xxxxxxxxxx_K_HxxxxxxKxx
P39447	186	K	xxxxxxxxxT_K_Vxxxxxxxxx
P39447	1183	K	xxxxxxxxxx_K_Sxxxxxxxxx
P39749	198	K	xxxxxxxxxA_K_Kxxxxxxxxx
P40124	70	K	xxxxxxxxxx_K_Hxxxxxxxxx
P40124	326	K	xxxxxxxxxG_K_Kxxxxxxxxx
P40124	177	K	xxxxxxxxxx_K_Hxxxxxxxxx
P40124	411	K	xxxxxxxxxx_K_TDxxxxxxxx
P40142	232	K	xxxxxxxxxx_K_Hxxxxxxxxx
P40142	241	K	xxxxxxxxxx_K_Txxxxxxxxx
P40142	260	K	xxxxxxxxxG_K_Pxxxxxxxxx
P40142	6	K	xxxxxxxxxx_K_xDxxxxxxxx
P40201	995	K	xxxxxxxxxx_K_Rxxxxxxxxx
P40336	38	K	xxxxxxxxxx_K_Hxxxxxxxxx
P40630	70	K	xxxxxxxxxx_K_Hxxxxxxxxx
P40630	189	K	xxxxxxxxxx_K_Nxxxxxxxxx
P40630	103	K	xxxxxxxxDx_K_xxxxxxxxxx
P41105	47	K	xxxxxxxxxx_K_Txxxxxxxxx
Q9R1K9	124	K	xxxxxxxxxF_K_Nxxxxxxxxx
P41731	117	K	xxxxxxxxxx_K_Sxxxxxxxxx
P42125	270	K	xxxxxxxxxx_K_Dxxxxxxxxx
P42125	76	K	xxxxxxxxxx_K_Sxxxxxxxxx
P42125	229	K	xxxxxxxxxT_K_xxxxxxxxxx
Q3UCQ1	319	K	xxxxxxxxxG_K_Gxxxxxxxxx
P42227	370	K	xxxxxxxxxx_K_Dxxxxxxxxx
P42932	152	K	xxxxxxxxxx_K_Nxxxxxxxxx
P42932	364	K	xxxxxxxxxx_K_Hxxxxxxxxx
P43247	918	K	xxxxxxxxxx_K_NNxxxxxxxx
P43274	148	K	xxxxxxxxxA_K_Kxxxxxxxxx
P43277	169	K	xxxxxxxxxA_K_Kxxxxxxxxx
P43274	34	K	xxxxxxxxxx_K_Txxxxxxxxx
P43274	46	K	xxxxxxxxxT_K_xxxxxxxxxx
P43277	91	K	xxxxxxxxxx_K_Gxxxxxxxxx
P43275	121	K	xxxxxxxxxT_K_Vxxxxxxxxx
P43275	66	K	xxxxxxxxxK_K_Sxxxxxxxxx
P43275	77	K	xxxxxxxxxx_K_NNxxxxxxxx
P43275	22	K	xxxxxxxxxA_K_Kxxxxxxxxx
P43276	185	K	xxxxxxxxxx_K_Sxxxxxxxxx
P43276	75	K	xxxxxxxxxx_K_NNxxxxxxxx
P43276	63	K	xxxxxxxxxx_K_Kxxxxxxxxx
P43276	46	K	xxxxxxxxxT_K_xxxxxxxxxx
P43276	165	K	xxxxxxxxxx_K_Kxxxxxxxxx
P43277	26	K	xxxxxxxxxx_K_Txxxxxxxxx
P43277	33	K	xxxxxxxxxx_K_Rxxxxxxxxx
P45481	13	K	xxxxxxxxxx_K_Rxxxxxxxxx
P45481	1584	K	xxxxxxxxxx_K_Nxxxxxxxxx
P45481	1587	K	xxxxxxxxxA_K_Kxxxxxxxxx
P45481	1588	K	xxxxxxxxxx_K_Kxxxxxxxxx
P45481	1589	K	xxxxxxxxxx_K_NNxxxxxxxx
P45481	1592	K	xxxxxxxxxx_K_Kxxxxxxxxx
P45481	1593	K	xxxxxxxxxx_K_Txxxxxxxxx
P45481	1596	K	xxxxxxxxxx_K_Nxxxxxxxxx
P45481	1598	K	xxxxxxxxxx_K_Sxxxxxxxxx
P45481	1217	K	xxxxxxxxxG_K_xxxxxxxxxx
P45481	1628	K	xxxxxxxxxx_K_Hxxxxxxxxx
P45481	1763	K	xxxxxxxxxx_K_Sxxxxxxxxx
P45591	44	K	xxxxxxxxxx_K_Rxxxxxxxxx
P45591	144	K	xxxxxxxxxx_K_Dxxxxxxxxx
P45878	99	K	xxxxxxxxxx_K_Rxxxxxxxxx
P45878	34	K	xxxxxxxxxx_K_Kxxxxxxxxx
P45952	79	K	xxxxxxxxxx_K_Rxxxxxxxxx
P45952	212	K	xxxxxxxxDx_K_xxxxxxxxxx
P46061	526	K	xxxxxxxxxx_K_Sxxxxxxxxx
P62492	125	K	xxxxxxxxxx_K_Sxxxxxxxxx
P62492	41	K	xxxxxxxxxx_K_Sxxxxxxxxx
P62492	24	K	xxxxxxxxxG_K_Sxxxxxxxxx
P46735	100	K	xxxxxxxxxx_K_Dxxxxxxxxx
P47738	443	K	xxxxxxxxDx_K_xxxxxxxxxx
P47738	430	K	xxxxxxxxxx_K_Txxxxxxxxx
P47738	377	K	xxxxxxxxxx_K_Sxxxxxxxxx
P47738	54	K	xxxxxxxxxx_K_Txxxxxxxxx
P47738	75	K	xxxxxxxxxx_K_xDxxxxxxxx
P47738	370	K	xxxxxxxxxx_K_Kxxxxxxxxx
P47738	161	K	xxxxxxxxxG_K_Txxxxxxxxx
P47753	166	K	xxxxxxxxxP_K_Nxxxxxxxxx
P47754	146	K	xxxxxxxxxG_K_Kxxxxxxxxx
P47754	86	K	xxxxxxxxxG_K_xxxxxxxxxx
P47754	166	K	xxxxxxxxxx_K_Nxxxxxxxxx
P47757	159	K	xxxxxxxxxx_K_Sxxxxxxxxx
P47757	199	K	xxxxxxxxxx_K_Dxxxxxxxxx
P47757	235	K	xxxxxxxxxG_K_Txxxxxxxxx
P47757	57	K	xxxxxxxxxx_K_Dxxxxxxxxx
P47791	318	K	xxxxxxxxxx_K_Gxxxxxxxxx
P47791	324	K	xxxxxxxxxN_K_Vxxxxxxxxx
P47791	278	K	xxxxxxxxxx_K_Txxxxxxxxx
P47791	142	K	xxxxxxxxxx_K_Sxxxxxxxxx
P47856	48	K	xxxxxxxxxx_K_Dxxxxxxxxx
P47911	218	K	xxxxxxxxxx_K_HxxxxxxKxx
P47911	138	K	xxxxxxxxxG_K_Kxxxxxxxxx
P47934	268	K	xxxxxxxxxx_K_Dxxxxxxxxx
P47934	423	K	xxxxxxxxxx_K_Sxxxxxxxxx
P47934	281	K	xxxxxxxxxx_K_Sxxxxxxxxx
P47962	27	K	xxxxxxxxxG_K_Txxxxxxxxx
P47962	197	K	xxxxxxxxxx_K_Hxxxxxxxxx
P47962	276	K	xxxxxxxxxx_K_Kxxxxxxxxx
P47962	228	K	xxxxxxxxxx_K_NNxxxxxxxx
P47962	158	K	xxxxxxxxxN_K_Vxxxxxxxxx
P47962	220	K	xxxxxxxxxx_K_Kxxxxxxxxx
P47964	13	K	xxxxxxxxxx_K_Gxxxxxxxxx
P47968	88	K	xxxxxxxxxx_K_NNxxxxxxxx
P48024	56	K	xxxxxxxxxx_K_Kxxxxxxxxx
P48036	95	K	xxxxxxxxxx_K_Hxxxxxxxxx
P48678	260	K	xxxxxxxxxx_K_Kxxxxxxxxx
P48678	417	K	xxxxxxxxxx_K_Kxxxxxxxxx
P48678	155	K	xxxxxxxxxx_K_Rxxxxxxxxx
P48678	265	K	xxxxxxxxxx_K_Txxxxxxxxx
P48678	180	K	xxxxxxxxxA_K_Kxxxxxxxxx
P48678	457	K	xxxxxxxxxx_K_Sxxxxxxxxx
P48722	68	K	xxxxxxxxxx_K_Kxxxxxxxxx
P48725	271	K	xxxxxxxxxx_K_HxxxxxxKxx
P48725	2350	K	xxxxxxxxxx_K_Hxxxxxxxxx
P48725	1931	K	xxxxxxxxxx_K_Hxxxxxxxxx
P48754	65	K	xxxxxxxxxx_K_NExxxxxxxx
P48754	1072	K	xxxxxxxxxx_K_xxxxKxxxxx
P48962	199	K	xxxxxxxxxx_K_Gxxxxxxxxx
P48962	272	K	xxxxxxxxxx_K_Gxxxxxxxxx
P48962	263	K	xxxxxxxxxx_K_Dxxxxxxxxx
P48962	166	K	xxxxxxxxxx_K_Sxxxxxxxxx
P48962	147	K	xxxxxxxxxG_K_Gxxxxxxxxx
P51881	92	K	xxxxxxxxxx_K_Dxxxxxxxxx
P48962	96	K	xxxxxxxxxY_K_xxxxxxxxxx
P49025	723	K	xxxxxxxxxx_K_Sxxxxxxxxx
P49117	231	K	xxxxxxxxxx_K_Dxxxxxxxxx
P49117	163	K	xxxxxxxxxx_K_Hxxxxxxxxx
P49312	105	K	xxxxxxxxxx_K_Kxxxxxxxxx
P49312	78	K	xxxxxxxxxx_K_VDxxxxxxxx
P49312	52	K	xxxxxxxxxx_K_Rxxxxxxxxx
P49312	3	K	xxxxxxxxxx_K_Sxxxxxxxxx
P49717	857	K	xxxxxxxxxG_K_Txxxxxxxxx
P49717	751	K	xxxxxxxxxN_K_Vxxxxxxxxx
P49717	761	K	xxxxxxxxxx_K_Rxxxxxxxxx
P49717	412	K	xxxxxxxxxx_K_Txxxxxxxxx
P49717	408	K	xxxxxxxxxx_K_Sxxxxxxxxx
P49718	141	K	xxxxxxxxxx_K_Sxxxxxxxxx
P49722	171	K	xxxxxxxxxG_K_Txxxxxxxxx
P49817	57	K	xxxxxxxxxx_K_HxxxxxxKxx
P50136	353	K	xxxxxxxxxx_K_xDxxxxxxxx
P50171	66	K	xxxxxxxxxx_K_Hxxxxxxxxx
P50247	426	K	xxxxxxxxxx_K_xDxxxxxxxx
P50247	188	K	xxxxxxxxxx_K_xDxxxxxxxx
P50518	138	K	xxxxxxxxxx_K_xDxxxxxxxx
P50544	72	K	xxxxxxxxxx_K_Sxxxxxxxxx
P50544	122	K	xxxxxxxxxx_K_NDxxxxxxxx
P50544	483	K	xxxxxxxxxG_K_xxxxxxxxxx
P50544	557	K	xxxxxxxxxx_K_Gxxxxxxxxx
P50580	287	K	xxxxxxxxxx_K_Kxxxxxxxxx
P50580	344	K	xxxxxxxxxx_K_Sxxxxxxxxx
P51150	146	K	xxxxxxxxxx_K_NNxxxxxxxx
P51150	21	K	xxxxxxxxxG_K_Txxxxxxxxx
P51174	322	K	xxxxxxxxxG_K_Txxxxxxxxx
P51174	358	K	xxxxxxxxxx_K_Rxxxxxxxxx
P51174	338	K	xxxxxxxxxx_K_Txxxxxxxxx
P51174	42	K	xxxxxxxxxA_K_Kxxxxxxxxx
P51612	635	K	xxxxxxxxxY_K_Nxxxxxxxxx
P51655	44	K	xxxxxxxxxx_K_NDxxxxxxxx
P51660	139	K	xxxxxxxxxx_K_Kxxxxxxxxx
P51660	46	K	xxxxxxxxxx_K_Gxxxxxxxxx
P51660	57	K	xxxxxxxxxD_K_Vxxxxxxxxx
P51660	301	K	xxxxxxxxxx_K_VDxxxxxxxx
P51660	184	K	xxxxxxxxxx_K_NNxxxxxxxx
P51660	84	K	xxxxxxxxxx_K_Txxxxxxxxx
P51859	105	K	xxxxxxxxxx_K_Kxxxxxxxxx
P51863	265	K	xxxxxxxxxV_K_Nxxxxxxxxx
P51881	199	K	xxxxxxxxxx_K_Gxxxxxxxxx
P51881	268	K	xxxxxxxxxS_K_xxxxxxxxxx
P51881	23	K	xxxxxxxxxx_K_Txxxxxxxxx
P51881	155	K	xxxxxxxxxx_K_Gxxxxxxxxx
P51881	166	K	xxxxxxxxxx_K_Sxxxxxxxxx
P51881	147	K	xxxxxxxxxG_K_xxxxxxxKxx
P51881	105	K	xxxxxxxxxx_K_Rxxxxxxxxx
P51943	67	K	xxxxxxxxxx_K_Dxxxxxxxxx
P52293	22	K	xxxxxxxxxx_K_Dxxxxxxxxx
P52479	696	K	xxxxxxxxxV_K_Nxxxxxxxxx
P52480	162	K	xxxxxxxxxY_K_Nxxxxxxxxx
P52480	66	K	xxxxxxxxxx_K_Sxxxxxxxxx
P52480	206	K	xxxxxxxxxx_K_Kxxxxxxxxx
P52480	135	K	xxxxxxxxxx_K_Kxxxxxxxxx
P52480	270	K	xxxxxxxxxS_K_xxxxxxxxxx
P52482	189	K	xxxxxxxxxx_K_Rxxxxxxxxx
P52503	100	K	xxxxxxxxxx_K_Txxxxxxxxx
P52503	41	K	xxxxxxxxxx_K_Dxxxxxxxxx
P52760	60	K	xxxxxxxxxL_K_Nxxxxxxxxx
P52825	522	K	xxxxxxxxxx_K_Hxxxxxxxxx
P52825	453	K	xxxxxxxxxG_K_xxxxxxxxxx
P52825	79	K	xxxxxxxxxx_K_Txxxxxxxxx
P52825	495	K	xxxxxxxxxx_K_Hxxxxxxxxx
P52825	544	K	xxxxxxxxxT_K_xxxxxxxxxx
P52912	145	K	xxxxxxxxxG_K_Sxxxxxxxxx
P52963	619	K	xxxxxxxxxx_K_TDxxxxxxxx
P53026	91	K	xxxxxxxxxx_K_Kxxxxxxxxx
P53026	106	K	xxxxxxxxxx_K_xDxxxxxxxx
P53026	152	K	xxxxxxxxxx_K_Sxxxxxxxxx
P53395	82	K	xxxxxxxxxx_K_xxxxKxxxxx
P53395	435	K	xxxxxxxxxx_K_xDxxxxxxxx
P53395	440	K	xxxxxxxxxY_K_xxxxxxxxxx
P53395	196	K	xxxxxxxxxx_K_Dxxxxxxxxx
P53395	222	K	xxxxxxxxxx_K_Sxxxxxxxxx
P53395	250	K	xxxxxxxxxx_K_Dxxxxxxxxx
P70403	144	K	xxxxxxxxxV_K_Nxxxxxxxxx
P53569	376	K	xxxxxxxxxx_K_xxxxKxxxxx
P53569	963	K	xxxxxxxxxx_K_Kxxxxxxxxx
P53810	186	K	xxxxxxxxxx_K_Dxxxxxxxxx
P53811	116	K	xxxxxxxxxx_K_xDxxxxxxxx
P53994	29	K	xxxxxxxxxx_K_Rxxxxxxxxx
P54071	272	K	xxxxxxxxxx_K_HxxxxxxKxx
P54071	275	K	xxxxxxxxxx_K_TDxxxxxxxx
P54071	155	K	xxxxxxxxxx_K_Nxxxxxxxxx
P54071	263	K	xxxxxxxxxx_K_Dxxxxxxxxx
P54071	180	K	xxxxxxxxxY_K_xxxxxxxxxx
P54071	442	K	xxxxxxxxxx_K_Sxxxxxxxxx
P54071	199	K	xxxxxxxxxx_K_Dxxxxxxxxx
P54071	133	K	xxxxxxxxxx_K_Sxxxxxxxxx
P54071	413	K	xxxxxxxxxx_K_Dxxxxxxxxx
P54276	169	K	xxxxxxxxxx_K_Sxxxxxxxxx
P54276	1099	K	xxxxxxxxxx_K_Txxxxxxxxx
P54276	1039	K	xxxxxxxxxx_K_Nxxxxxxxxx
P54279	210	K	xxxxxxxxxx_K_Rxxxxxxxxx
P54761	577	K	xxxxxxxxxD_K_Hxxxxxxxxx
P54761	639	K	xxxxxxxxxG_K_Kxxxxxxxxx
P54775	404	K	xxxxxxxxxx_K_Txxxxxxxxx
P54775	330	K	xxxxxxxxDx_K_xxxxxxxxxx
P54823	104	K	xxxxxxxxxx_K_Rxxxxxxxxx
P54823	146	K	xxxxxxxxxG_K_Sxxxxxxxxx
P55014	730	K	xxxxxxxxxA_K_Kxxxxxxxxx
P55200	1200	K	xxxxxxxxxS_K_xxxxxxxxxx
P55200	247	K	xxxxxxxxxx_K_xDxxxxxxxx
P55200	340	K	xxxxxxxxxx_K_xDxxxxxxxx
P55200	2954	K	xxxxxxxxxx_K_Rxxxxxxxxx
P55200	1519	K	xxxxxxxxxx_K_Kxxxxxxxxx
P55200	2742	K	xxxxxxxxxG_K_xxxxxxxKxx
P55200	2771	K	xxxxxxxxxx_K_NExxxxxxxx
P55200	2274	K	xxxxxxxxxx_K_Txxxxxxxxx
P55264	10	K	xxxxxxxxxx_K_Kxxxxxxxxx
P55302	309	K	xxxxxxxxxx_K_Hxxxxxxxxx
P55937	525	K	xxxxxxxxxx_K_Dxxxxxxxxx
P56376	73	K	xxxxxxxxxx_K_Sxxxxxxxxx
P56382	28	K	xxxxxxxxxx_K_Txxxxxxxxx
P56382	32	K	xxxxxxxxxx_K_xxxxKxxxxx
P56391	47	K	xxxxxxxxxx_K_Gxxxxxxxxx
P56391	28	K	xxxxxxxxxx_K_Nxxxxxxxxx
P56391	13	K	xxxxxxxxxx_K_Txxxxxxxxx
P56394	40	K	xxxxxxxxxx_K_Gxxxxxxxxx
P56394	30	K	xxxxxxxxxx_K_Kxxxxxxxxx
P56395	24	K	xxxxxxxxxx_K_Sxxxxxxxxx
P56395	19	K	xxxxxxxxxx_K_Hxxxxxxxxx
P56399	64	K	xxxxxxxxxx_K_Txxxxxxxxx
P56479	231	K	xxxxxxxxxL_K_Nxxxxxxxxx
P56479	235	K	xxxxxxxxxx_K_Kxxxxxxxxx
P56479	236	K	xxxxxxxxxK_K_Sxxxxxxxxx
P56480	264	K	xxxxxxxxxS_K_xxxxxxxxxx
P56480	259	K	xxxxxxxxxx_K_Dxxxxxxxxx
P56480	198	K	xxxxxxxxxx_K_Gxxxxxxxxx
P56695	764	K	xxxxxxxxxx_K_Hxxxxxxxxx
P56959	309	K	xxxxxxxxxx_K_Txxxxxxxxx
P56959	305	K	xxxxxxxxxx_K_Txxxxxxxxx
P56960	102	K	xxxxxxxxxS_K_xxxxxxxxxx
P57016	251	K	xxxxxxxxxx_K_Txxxxxxxxx
Q61990	31	K	xxxxxxxxxG_K_Kxxxxxxxxx
Q61990	23	K	xxxxxxxxxG_K_xxxxxxxKxx
P57746	36	K	xxxxxxxxxK_K_Sxxxxxxxxx
P57776	195	K	xxxxxxxxxx_K_Sxxxxxxxxx
P57780	780	K	xxxxxxxxxx_K_Dxxxxxxxxx
P57780	218	K	xxxxxxxxxx_K_Dxxxxxxxxx
P57780	456	K	xxxxxxxxxx_K_Hxxxxxxxxx
P57780	55	K	xxxxxxxxxx_K_Txxxxxxxxx
P57780	536	K	xxxxxxxxxx_K_Rxxxxxxxxx
P57780	182	K	xxxxxxxxxY_K_Nxxxxxxxxx
P57784	179	K	xxxxxxxxxx_K_Txxxxxxxxx
P58021	143	K	xxxxxxxxxK_K_Sxxxxxxxxx
P58021	125	K	xxxxxxxxxx_K_Txxxxxxxxx
P58044	37	K	xxxxxxxxxx_K_Nxxxxxxxxx
P58044	169	K	xxxxxxxxxx_K_Sxxxxxxxxx
P58044	176	K	xxxxxxxxxS_K_xxxxxxxxxx
P58069	582	K	xxxxxxxxxx_K_Kxxxxxxxxx
P58242	140	K	xxxxxxxxxP_K_Nxxxxxxxxx
P58252	571	K	xxxxxxxxxx_K_Kxxxxxxxxx
P58252	572	K	xxxxxxxxxK_K_Sxxxxxxxxx
P58252	275	K	xxxxxxxxxx_K_Sxxxxxxxxx
P58252	32	K	xxxxxxxxxG_K_Sxxxxxxxxx
P58281	598	K	xxxxxxxxxx_K_NExxxxxxxx
P58281	579	K	xxxxxxxxxx_K_NNxxxxxxxx
P58281	691	K	xxxxxxxxxG_K_xxxxxxxKxx
P58281	834	K	xxxxxxxxxx_K_Dxxxxxxxxx
P58281	250	K	xxxxxxxxxx_K_Dxxxxxxxxx
P58281	792	K	xxxxxxxxxx_K_NExxxxxxxx
P58462	488	K	xxxxxxxxxY_K_Nxxxxxxxxx
P58501	252	K	xxxxxxxxxG_K_Gxxxxxxxxx
P58771	48	K	xxxxxxxxxx_K_Kxxxxxxxxx
P58771	248	K	xxxxxxxxxT_K_xxxxxxxxxx
P58871	946	K	xxxxxxxxxG_K_Sxxxxxxxxx
P59110	586	K	xxxxxxxxxK_K_Sxxxxxxxxx
P59110	136	K	xxxxxxxxxG_K_Sxxxxxxxxx
P59242	619	K	xxxxxxxxxx_K_Kxxxxxxxxx
P59325	70	K	xxxxxxxxxx_K_NDxxxxxxxx
P59328	664	K	xxxxxxxxxG_K_Sxxxxxxxxx
P59481	122	K	xxxxxxxxxx_K_Nxxxxxxxxx
P59708	7	K	xxxxxxxxxx_K_Rxxxxxxxxx
P59708	71	K	xxxxxxxxxx_K_Nxxxxxxxxx
P59997	79	K	xxxxxxxxxF_K_Nxxxxxxxxx
P59997	409	K	xxxxxxxxxG_K_xxxxxxxxxx
P59999	128	K	xxxxxxxxxx_K_Hxxxxxxxxx
P60122	152	K	xxxxxxxxxG_K_Txxxxxxxxx
P60122	2	K	xxxxxxxxxx_K_xxxxKxxxxx
P60670	350	K	xxxxxxxxxx_K_Hxxxxxxxxx
P60710	50	K	xxxxxxxxxx_K_Dxxxxxxxxx
P60710	291	K	xxxxxxxxxx_K_Dxxxxxxxxx
P60710	113	K	xxxxxxxxxx_K_xxxxKxxxxx
P60762	240	K	xxxxxxxxxx_K_Kxxxxxxxxx
P60762	143	K	xxxxxxxxxx_K_Nxxxxxxxxx
P60762	339	K	xxxxxxxxxx_K_Nxxxxxxxxx
P60766	166	K	xxxxxxxxxL_K_Nxxxxxxxxx
P60766	163	K	xxxxxxxxxx_K_Gxxxxxxxxx
P60867	75	K	xxxxxxxxxx_K_Txxxxxxxxx
P60867	30	K	xxxxxxxxxx_K_Sxxxxxxxxx
P61021	183	K	xxxxxxxxxx_K_Sxxxxxxxxx
P61021	134	K	xxxxxxxxxx_K_xDxxxxxxxx
P61027	4	K	xxxxxxxxxx_K_Txxxxxxxxx
P61089	92	K	xxxxxxxxxx_K_Dxxxxxxxxx
P61161	299	K	xxxxxxxxxx_K_Hxxxxxxxxx
P61164	230	K	xxxxxxxxxx_K_Dxxxxxxxxx
P61202	263	K	xxxxxxxxxF_K_Nxxxxxxxxx
P61255	63	K	xxxxxxxxxx_K_Gxxxxxxxxx
P61255	69	K	xxxxxxxxxG_K_xxxxxxxKxx
Q9CQL1	16	K	xxxxxxxxxG_K_xxxxxxxxxx
Q9CQL1	114	K	xxxxxxxxxx_K_Dxxxxxxxxx
Q9CQL1	41	K	xxxxxxxxxY_K_Nxxxxxxxxx
P61358	27	K	xxxxxxxxxV_K_Nxxxxxxxxx
P61358	98	K	xxxxxxxxxx_K_Dxxxxxxxxx
P61358	93	K	xxxxxxxxxx_K_Txxxxxxxxx
P61514	44	K	xxxxxxxxxG_K_Txxxxxxxxx
P61804	82	K	xxxxxxxxxx_K_xDxxxxxxxx
P61957	11	K	xxxxxxxxxx_K_Txxxxxxxxx
P61961	69	K	xxxxxxxxxx_K_Hxxxxxxxxx
P61979	405	K	xxxxxxxxxG_K_Gxxxxxxxxx
P61979	60	K	xxxxxxxxxG_K_Gxxxxxxxxx
P61979	198	K	xxxxxxxxxG_K_Pxxxxxxxxx
P61982	162	K	xxxxxxxxxS_K_xxxxxxxxxx
P63101	49	K	xxxxxxxxxY_K_Nxxxxxxxxx
P62071	128	K	xxxxxxxxxx_K_xDxxxxxxxx
P62082	178	K	xxxxxxxxxx_K_Kxxxxxxxxx
P62137	260	K	xxxxxxxxxx_K_Rxxxxxxxxx
P62137	238	K	xxxxxxxxxx_K_Hxxxxxxxxx
P62137	141	K	xxxxxxxxxx_K_Rxxxxxxxxx
P62137	26	K	xxxxxxxxxx_K_Nxxxxxxxxx
P62192	423	K	xxxxxxxxxS_K_xxxxxxxxxx
P62242	139	K	xxxxxxxxxx_K_Kxxxxxxxxx
P62242	98	K	xxxxxxxxxV_K_Nxxxxxxxxx
P62259	118	K	xxxxxxxxxS_K_xxxxxxxxxx
P62259	106	K	xxxxxxxxxD_K_Hxxxxxxxxx
P62259	50	K	xxxxxxxxxY_K_Nxxxxxxxxx
P62264	63	K	xxxxxxxxxx_K_xDxxxxxxxx
P62267	48	K	xxxxxxxxxx_K_Gxxxxxxxxx
P62270	47	K	xxxxxxxxxx_K_xDxxxxxxxx
P62281	58	K	xxxxxxxxxx_K_Kxxxxxxxxx
P62281	45	K	xxxxxxxxxx_K_Txxxxxxxxx
P62281	20	K	xxxxxxxxxx_K_Kxxxxxxxxx
P62281	30	K	xxxxxxxxxG_K_xxxxxxxKxx
P62281	38	K	xxxxxxxxxY_K_Nxxxxxxxxx
P62301	34	K	xxxxxxxxDx_K_xxxxxxxxxx
P62301	9	K	xxxxxxxxxG_K_Gxxxxxxxxx
P62309	3	K	xxxxxxxxxS_K_xxxxxxxxxx
P62317	8	K	xxxxxxxxxx_K_Sxxxxxxxxx
P62320	78	K	xxxxxxxxxL_K_Nxxxxxxxxx
P62331	55	K	xxxxxxxxxY_K_Nxxxxxxxxx
P62702	71	K	xxxxxxxxxx_K_xDxxxxxxxx
P62702	134	K	xxxxxxxxxx_K_Gxxxxxxxxx
P62702	106	K	xxxxxxxxxx_K_Gxxxxxxxxx
P62702	16	K	xxxxxxxxxx_K_Hxxxxxxxxx
P62702	62	K	xxxxxxxxxx_K_Kxxxxxxxxx
P62717	56	K	xxxxxxxxxK_K_Sxxxxxxxxx
P62743	45	K	xxxxxxxxxx_K_Hxxxxxxxxx
P62751	70	K	xxxxxxxxxx_K_xDxxxxxxxx
P62774	66	K	xxxxxxxxxD_K_Hxxxxxxxxx
P62806	78	K	xxxxxxxxxx_K_Rxxxxxxxxx
P62806	32	K	xxxxxxxxxT_K_xxxxxxxxxx
P62806	9	K	xxxxxxxxxG_K_Gxxxxxxxxx
P62806	13	K	xxxxxxxxxG_K_Gxxxxxxxxx
P62806	17	K	xxxxxxxxxx_K_Rxxxxxxxxx
P62806	6	K	xxxxxxxxxG_K_Gxxxxxxxxx
P62806	80	K	xxxxxxxxxx_K_Txxxxxxxxx
P62806	92	K	xxxxxxxxxx_K_Rxxxxxxxxx
P62814	108	K	xxxxxxxxxA_K_Kxxxxxxxxx
P62814	109	K	xxxxxxxxxx_K_Txxxxxxxxx
P62814	460	K	xxxxxxxxxx_K_Nxxxxxxxxx
P62814	413	K	xxxxxxxxxx_K_Dxxxxxxxxx
P62827	37	K	xxxxxxxxxx_K_Kxxxxxxxxx
P62827	142	K	xxxxxxxxxx_K_Nxxxxxxxxx
P62827	152	K	xxxxxxxxxx_K_Sxxxxxxxxx
P62827	123	K	xxxxxxxxxx_K_VDxxxxxxxx
P62843	77	K	xxxxxxxxxx_K_Txxxxxxxxx
P62843	58	K	xxxxxxxxxx_K_Rxxxxxxxxx
P62849	37	K	xxxxxxxxxx_K_Txxxxxxxxx
P62849	32	K	xxxxxxxxxG_K_xxxxxxxxxx
P62849	68	K	xxxxxxxxxG_K_Txxxxxxxxx
P62869	55	K	xxxxxxxxxG_K_Txxxxxxxxx
P62878	19	K	xxxxxxxxxG_K_Kxxxxxxxxx
P62880	89	K	xxxxxxxxxN_K_Vxxxxxxxxx
P62889	68	K	xxxxxxxxxx_K_Txxxxxxxxx
P62892	5	K	xxxxxxxxxx_K_Txxxxxxxxx
P62900	31	K	xxxxxxxxxx_K_Rxxxxxxxxx
P62900	39	K	xxxxxxxxxx_K_Kxxxxxxxxx
P62900	115	K	xxxxxxxxxF_K_Nxxxxxxxxx
P62908	7	K	xxxxxxxxxx_K_Kxxxxxxxxx
P62911	93	K	xxxxxxxxxx_K_Sxxxxxxxxx
P62918	46	K	xxxxxxxxxx_K_Dxxxxxxxxx
P62918	92	K	xxxxxxxxxG_K_Kxxxxxxxxx
P62962	126	K	xxxxxxxxxx_K_Kxxxxxxxxx
P62962	91	K	xxxxxxxxxx_K_Sxxxxxxxxx
P62983	48	K	xxxxxxxxxG_K_xxxxxxxxxx
P62983	6	K	xxxxxxxxxx_K_Txxxxxxxxx
P62983	11	K	xxxxxxxxxG_K_Txxxxxxxxx
P62983	107	K	xxxxxxxxxx_K_VDxxxxxxxx
P62996	197	K	xxxxxxxxxx_K_Rxxxxxxxxx
P63017	88	K	xxxxxxxxxx_K_Hxxxxxxxxx
P63017	112	K	xxxxxxxxxx_K_Sxxxxxxxxx
P63017	328	K	xxxxxxxxxx_K_Sxxxxxxxxx
P63017	56	K	xxxxxxxxxx_K_Nxxxxxxxxx
P63017	246	K	xxxxxxxxxx_K_Rxxxxxxxxx
P63017	3	K	xxxxxxxxxx_K_Gxxxxxxxxx
P63017	108	K	xxxxxxxxxx_K_Gxxxxxxxxx
P63017	526	K	xxxxxxxxxY_K_xxxxxxxxxx
P63028	93	K	xxxxxxxxxx_K_Dxxxxxxxxx
P63037	23	K	xxxxxxxxxx_K_Kxxxxxxxxx
P63037	296	K	xxxxxxxxxx_K_Hxxxxxxxxx
P63038	481	K	xxxxxxxxxx_K_Nxxxxxxxxx
P63038	249	K	xxxxxxxxxx_K_Kxxxxxxxxx
P63038	359	K	xxxxxxxxxx_K_Gxxxxxxxxx
P63038	82	K	xxxxxxxxxx_K_Sxxxxxxxxx
P63038	87	K	xxxxxxxxxx_K_Dxxxxxxxxx
P63038	191	K	xxxxxxxxxx_K_Kxxxxxxxxx
P63038	364	K	xxxxxxxxxx_K_xxxxKxxxxx
P63038	202	K	xxxxxxxxxx_K_Dxxxxxxxxx
P63038	469	K	xxxxxxxxxx_K_Rxxxxxxxxx
P63038	417	K	xxxxxxxxxx_K_Kxxxxxxxxx
P63038	125	K	xxxxxxxxxx_K_xxxxKxxxxx
P63038	218	K	xxxxxxxxxx_K_xDxxxxxxxx
P63038	352	K	xxxxxxxxxx_K_Dxxxxxxxxx
P63038	75	K	xxxxxxxxxx_K_Dxxxxxxxxx
P63038	91	K	xxxxxxxxxY_K_Nxxxxxxxxx
P63073	36	K	xxxxxxxxxx_K_Hxxxxxxxxx
Q6R0H7	955	K	xxxxxxxxxD_K_Vxxxxxxxxx
P63101	157	K	xxxxxxxxxx_K_Kxxxxxxxxx
P63101	138	K	xxxxxxxxxx_K_Kxxxxxxxxx
P63154	314	K	xxxxxxxxxx_K_Rxxxxxxxxx
P63158	43	K	xxxxxxxxxx_K_Kxxxxxxxxx
P63158	30	K	xxxxxxxxxx_K_Hxxxxxxxxx
P63166	16	K	xxxxxxxxxx_K_Kxxxxxxxxx
P63168	9	K	xxxxxxxxxx_K_Nxxxxxxxxx
P63168	36	K	xxxxxxxxxx_K_Dxxxxxxxxx
Q8BGY2	47	K	xxxxxxxxxx_K_Txxxxxxxxx
Q8BGY2	67	K	xxxxxxxxxG_K_Kxxxxxxxxx
Q9Z199	43	K	xxxxxxxxxx_K_Gxxxxxxxxx
P63276	44	K	xxxxxxxxxx_K_Kxxxxxxxxx
P63321	128	K	xxxxxxxxxx_K_Sxxxxxxxxx
P63323	116	K	xxxxxxxxxG_K_xxxxxxxxxx
P63325	31	K	xxxxxxxxxx_K_Hxxxxxxxxx
P63325	139	K	xxxxxxxxDx_K_xxxxxxxxxx
P67984	80	K	xxxxxxxxxx_K_Rxxxxxxxxx
P67984	107	K	xxxxxxxxxS_K_xxxxxxxxxx
P68037	138	K	xxxxxxxxxx_K_Nxxxxxxxxx
P68037	145	K	xxxxxxxxxx_K_Kxxxxxxxxx
P68037	100	K	xxxxxxxxxx_K_TDxxxxxxxx
P68037	73	K	xxxxxxxxxT_K_xxxxxxxxxx
P68040	185	K	xxxxxxxxxx_K_Txxxxxxxxx
P68254	49	K	xxxxxxxxxY_K_Nxxxxxxxxx
P99024	350	K	xxxxxxxxxx_K_Txxxxxxxxx
P84244	80	K	xxxxxxxxxx_K_TDxxxxxxxx
P84244	19	K	xxxxxxxxxx_K_xxxxKxxxxx
P84244	24	K	xxxxxxxxxT_K_xxxxxxxxxx
P84228	28	K	xxxxxxxxxx_K_Sxxxxxxxxx
P84228	37	K	xxxxxxxxxx_K_Kxxxxxxxxx
P84244	10	K	xxxxxxxxxx_K_Sxxxxxxxxx
P84244	15	K	xxxxxxxxxG_K_xxxxxxxxxx
P84244	123	K	xxxxxxxxxx_K_Dxxxxxxxxx
P84244	57	K	xxxxxxxxxx_K_Sxxxxxxxxx
P68510	110	K	xxxxxxxxxx_K_Nxxxxxxxxx
P70121	485	K	xxxxxxxxxL_K_Nxxxxxxxxx
P70122	33	K	xxxxxxxxxY_K_Nxxxxxxxxx
P70195	195	K	xxxxxxxxxA_K_Kxxxxxxxxx
P70210	119	K	xxxxxxxxxx_K_Dxxxxxxxxx
P70210	249	K	xxxxxxxxxx_K_Hxxxxxxxxx
P70210	383	K	xxxxxxxxxx_K_Hxxxxxxxxx
P70211	1389	K	xxxxxxxxxG_K_xxxxxxxxxx
P70227	660	K	xxxxxxxxxP_K_Nxxxxxxxxx
P70227	968	K	xxxxxxxxxT_K_xxxxxxxxxx
P70227	569	K	xxxxxxxxxx_K_Nxxxxxxxxx
P70227	608	K	xxxxxxxxxx_K_Hxxxxxxxxx
P70227	1198	K	xxxxxxxxxL_K_Nxxxxxxxxx
P70227	2579	K	xxxxxxxxxx_K_TDxxxxxxxx
P70227	1111	K	xxxxxxxxxx_K_Sxxxxxxxxx
P70227	1589	K	xxxxxxxxxY_K_Nxxxxxxxxx
P70227	1216	K	xxxxxxxxxx_K_Sxxxxxxxxx
P70255	280	K	xxxxxxxxxx_K_Rxxxxxxxxx
P70257	276	K	xxxxxxxxxx_K_Rxxxxxxxxx
P70275	646	K	xxxxxxxxxx_K_Sxxxxxxxxx
P70288	9	K	xxxxxxxxxG_K_Kxxxxxxxxx
P70290	212	K	xxxxxxxxxS_K_xxxxxxxxxx
P70302	650	K	xxxxxxxxxG_K_Kxxxxxxxxx
P70333	98	K	xxxxxxxxxx_K_Hxxxxxxxxx
P70349	21	K	xxxxxxxxxG_K_xxxxxxxxxx
P70351	635	K	xxxxxxxxxx_K_NExxxxxxxx
P70372	55	K	xxxxxxxxxD_K_Vxxxxxxxxx
P70388	71	K	xxxxxxxxDx_K_xxxxxxxxxx
P70399	1623	K	xxxxxxxxxx_K_Rxxxxxxxxx
P70399	247	K	xxxxxxxxxG_K_Gxxxxxxxxx
P70399	1337	K	xxxxxxxxxG_K_xxxxxxxxxx
P70404	159	K	xxxxxxxxxx_K_Dxxxxxxxxx
P70404	149	K	xxxxxxxxxx_K_Sxxxxxxxxx
P70451	112	K	xxxxxxxxxK_K_Sxxxxxxxxx
Q60817	108	K	xxxxxxxxxx_K_xDxxxxxxxx
Q60817	100	K	xxxxxxxxxx_K_Nxxxxxxxxx
P70677	25	K	xxxxxxxxxx_K_Sxxxxxxxxx
P70696	22	K	xxxxxxxxxx_K_Txxxxxxxxx
P70700	844	K	xxxxxxxxxS_K_xxxxxxxxxx
P79457	549	K	xxxxxxxxxx_K_Dxxxxxxxxx
P79457	561	K	xxxxxxxxxA_K_Kxxxxxxxxx
P79457	627	K	xxxxxxxxxx_K_xDxxxxxxxx
P79457	18	K	xxxxxxxxxx_K_Kxxxxxxxxx
P80313	401	K	xxxxxxxxxx_K_NDxxxxxxxx
P80313	144	K	xxxxxxxxxx_K_Kxxxxxxxxx
P80314	72	K	xxxxxxxxxL_K_Nxxxxxxxxx
P80315	21	K	xxxxxxxxxG_K_Sxxxxxxxxx
P80315	292	K	xxxxxxxxxx_K_Txxxxxxxxx
P80316	496	K	xxxxxxxxxx_K_Gxxxxxxxxx
P80316	232	K	xxxxxxxxxx_K_Dxxxxxxxxx
P80316	223	K	xxxxxxxxDx_K_xxxxxxxxxx
P80317	5	K	xxxxxxxxxx_K_Txxxxxxxxx
P80317	381	K	xxxxxxxxxx_K_Hxxxxxxxxx
P80317	199	K	xxxxxxxxxx_K_Sxxxxxxxxx
P80317	251	K	xxxxxxxxxx_K_Sxxxxxxxxx
P80318	469	K	xxxxxxxxxx_K_Hxxxxxxxxx
P80318	78	K	xxxxxxxxxx_K_Sxxxxxxxxx
P80318	222	K	xxxxxxxxxx_K_Dxxxxxxxxx
P80318	248	K	xxxxxxxxxx_K_Kxxxxxxxxx
P83870	3	K	xxxxxxxxxx_K_Hxxxxxxxxx
P83870	95	K	xxxxxxxxxx_K_TDxxxxxxxx
P83882	38	K	xxxxxxxxxx_K_Rxxxxxxxxx
P83882	30	K	xxxxxxxxxx_K_Dxxxxxxxxx
P83882	97	K	xxxxxxxxxx_K_Kxxxxxxxxx
P83882	22	K	xxxxxxxxxx_K_xxxxKxxxxx
P83917	35	K	xxxxxxxxxG_K_xxxxxxxKxx
P83917	184	K	xxxxxxxxxx_K_Nxxxxxxxxx
P83917	79	K	xxxxxxxxxx_K_Sxxxxxxxxx
P83917	139	K	xxxxxxxxxx_K_Nxxxxxxxxx
P84089	84	K	xxxxxxxxxx_K_Dxxxxxxxxx
P84089	41	K	xxxxxxxxxx_K_Rxxxxxxxxx
P84091	405	K	xxxxxxxxxx_K_xxxxKxxxxx
P84099	80	K	xxxxxxxxxx_K_Rxxxxxxxxx
P84104	11	K	xxxxxxxxDx_K_xxxxxxxxxx
P84104	23	K	xxxxxxxxxx_K_Txxxxxxxxx
P84104	85	K	xxxxxxxxxx_K_Rxxxxxxxxx
P84244	28	K	xxxxxxxxxx_K_Sxxxxxxxxx
P84244	37	K	xxxxxxxxxx_K_Kxxxxxxxxx
P97304	15	K	xxxxxxxxxx_K_Txxxxxxxxx
P97310	510	K	xxxxxxxxxx_K_Hxxxxxxxxx
P97311	643	K	xxxxxxxxxx_K_Hxxxxxxxxx
P97311	365	K	xxxxxxxxxx_K_Rxxxxxxxxx
P97313	3696	K	xxxxxxxxxx_K_NExxxxxxxx
P97313	3593	K	xxxxxxxxxx_K_Dxxxxxxxxx
P97315	161	K	xxxxxxxxxx_K_Dxxxxxxxxx
P97315	42	K	xxxxxxxxxx_K_Nxxxxxxxxx
P97315	137	K	xxxxxxxxxG_K_Sxxxxxxxxx
P97351	28	K	xxxxxxxxxx_K_Dxxxxxxxxx
P97351	152	K	xxxxxxxxxx_K_Txxxxxxxxx
P97351	195	K	xxxxxxxxxx_K_Dxxxxxxxxx
P97351	94	K	xxxxxxxxxx_K_Nxxxxxxxxx
P97351	56	K	xxxxxxxxxT_K_xxxxxxxxxx
P97351	27	K	xxxxxxxxxx_K_Kxxxxxxxxx
P97363	279	K	xxxxxxxxxx_K_Hxxxxxxxxx
P97363	150	K	xxxxxxxxxx_K_Sxxxxxxxxx
P97363	213	K	xxxxxxxxxD_K_Hxxxxxxxxx
P97370	7	K	xxxxxxxxxK_K_Sxxxxxxxxx
P97372	156	K	xxxxxxxxxT_K_Vxxxxxxxxx
P97379	216	K	xxxxxxxxxx_K_HxxxxxxKxx
P97384	253	K	xxxxxxxxxx_K_Sxxxxxxxxx
P97384	477	K	xxxxxxxxxG_K_Sxxxxxxxxx
P97386	937	K	xxxxxxxxxx_K_Kxxxxxxxxx
P97386	668	K	xxxxxxxxxx_K_Gxxxxxxxxx
P97386	917	K	xxxxxxxxxx_K_Sxxxxxxxxx
P97386	422	K	xxxxxxxxxx_K_Hxxxxxxxxx
P97393	298	K	xxxxxxxxxL_K_Nxxxxxxxxx
P97433	1643	K	xxxxxxxxxY_K_Nxxxxxxxxx
P97447	57	K	xxxxxxxxxY_K_Nxxxxxxxxx
P97447	214	K	xxxxxxxxxY_K_Nxxxxxxxxx
P97450	99	K	xxxxxxxxDx_K_xxxxxxxxxx
P97450	79	K	xxxxxxxxxx_K_xxxxKxxxxx
P97450	84	K	xxxxxxxxxG_K_Gxxxxxxxxx
P97452	7	K	xxxxxxxxxG_K_Pxxxxxxxxx
P97461	191	K	xxxxxxxxxx_K_Kxxxxxxxxx
P97471	45	K	xxxxxxxxxx_K_Kxxxxxxxxx
P97471	106	K	xxxxxxxxxx_K_NExxxxxxxx
P97493	152	K	xxxxxxxxxx_K_Dxxxxxxxxx
P97493	110	K	xxxxxxxxxG_K_xxxxxxxxxx
P97496	749	K	xxxxxxxxxx_K_VDxxxxxxxx
P97496	386	K	xxxxxxxxxP_K_Nxxxxxxxxx
P97496	738	K	xxxxxxxxxx_K_Kxxxxxxxxx
P97496	400	K	xxxxxxxxxx_K_Gxxxxxxxxx
P97496	345	K	xxxxxxxxxx_K_Gxxxxxxxxx
P97807	112	K	xxxxxxxxDx_K_xxxxxxxxxx
P97807	169	K	xxxxxxxxxx_K_Kxxxxxxxxx
P97807	470	K	xxxxxxxxxx_K_Txxxxxxxxx
P97807	220	K	xxxxxxxxxS_K_xxxxxxxxxx
P97807	58	K	xxxxxxxxxx_K_xxxxKxxxxx
P97825	148	K	xxxxxxxxxG_K_Sxxxxxxxxx
P97855	36	K	xxxxxxxxxx_K_Nxxxxxxxxx
P97863	100	K	xxxxxxxxxx_K_Hxxxxxxxxx
P97863	270	K	xxxxxxxxxx_K_Rxxxxxxxxx
P97868	66	K	xxxxxxxxxP_K_Nxxxxxxxxx
P97868	1401	K	xxxxxxxxxx_K_Gxxxxxxxxx
P97868	1405	K	xxxxxxxxxx_K_Dxxxxxxxxx
P97868	1466	K	xxxxxxxxxx_K_Dxxxxxxxxx
P97868	1208	K	xxxxxxxxxA_K_Kxxxxxxxxx
P97868	1032	K	xxxxxxxxxx_K_Dxxxxxxxxx
P97868	173	K	xxxxxxxxxx_K_Nxxxxxxxxx
P97868	324	K	xxxxxxxxxx_K_NExxxxxxxx
P97868	1127	K	xxxxxxxxxx_K_Dxxxxxxxxx
P97868	85	K	xxxxxxxxxx_K_Txxxxxxxxx
P97868	1158	K	xxxxxxxxxx_K_Dxxxxxxxxx
P97868	1345	K	xxxxxxxxxG_K_Pxxxxxxxxx
P97929	2628	K	xxxxxxxxxG_K_Txxxxxxxxx
P98203	522	K	xxxxxxxxxF_K_Nxxxxxxxxx
P99024	58	K	xxxxxxxxxG_K_xxxxxxxxxx
P99029	98	K	xxxxxxxxxx_K_Txxxxxxxxx
Q00288	80	K	xxxxxxxxxS_K_xxxxxxxxxx
Q00612	497	K	xxxxxxxxxx_K_Rxxxxxxxxx
Q00731	146	K	xxxxxxxxxG_K_Gxxxxxxxxx
Q00731	148	K	xxxxxxxxxG_K_Gxxxxxxxxx
Q00731	151	K	xxxxxxxxxx_K_Rxxxxxxxxx
Q00899	183	K	xxxxxxxxxK_K_Sxxxxxxxxx
Q00PI9	289	K	xxxxxxxxxG_K_xxxxxxxxxx
Q00PI9	472	K	xxxxxxxxxx_K_Dxxxxxxxxx
Q01147	319	K	xxxxxxxxxx_K_Dxxxxxxxxx
Q01237	703	K	xxxxxxxxxG_K_Txxxxxxxxx
Q01279	1061	K	xxxxxxxxxx_K_xDxxxxxxxx
Q01279	293	K	xxxxxxxxxx_K_Kxxxxxxxxx
Q01320	1488	K	xxxxxxxxxx_K_Gxxxxxxxxx
Q01320	430	K	xxxxxxxxxx_K_Hxxxxxxxxx
Q01320	385	K	xxxxxxxxxx_K_Sxxxxxxxxx
Q01320	1438	K	xxxxxxxxxx_K_Sxxxxxxxxx
Q01320	155	K	xxxxxxxxxx_K_Kxxxxxxxxx
Q01320	519	K	xxxxxxxxxx_K_Nxxxxxxxxx
Q01320	797	K	xxxxxxxxxx_K_Dxxxxxxxxx
Q01320	341	K	xxxxxxxxxx_K_Kxxxxxxxxx
Q01320	1429	K	xxxxxxxxxx_K_Kxxxxxxxxx
Q01405	669	K	xxxxxxxxxx_K_Sxxxxxxxxx
Q01768	56	K	xxxxxxxxxx_K_Dxxxxxxxxx
Q01853	8	K	xxxxxxxxxx_K_xDxxxxxxxx
Q01853	615	K	xxxxxxxxxx_K_Nxxxxxxxxx
Q01853	668	K	xxxxxxxxxx_K_Dxxxxxxxxx
Q02780	299	K	xxxxxxxxxx_K_Rxxxxxxxxx
Q02819	176	K	xxxxxxxxxx_K_Rxxxxxxxxx
Q03145	579	K	xxxxxxxxxx_K_Sxxxxxxxxx
Q03145	140	K	xxxxxxxxxx_K_xDxxxxxxxx
Q03172	737	K	xxxxxxxxxx_K_Txxxxxxxxx
Q03265	305	K	xxxxxxxxxx_K_Hxxxxxxxxx
Q03265	316	K	xxxxxxxxxS_K_xxxxxxxxxx
Q03265	239	K	xxxxxxxxxx_K_Kxxxxxxxxx
Q03265	167	K	xxxxxxxxxx_K_Txxxxxxxxx
Q03265	498	K	xxxxxxxxxx_K_xxxxKxxxxx
Q03265	539	K	xxxxxxxxDx_K_xxxxxxxxxx
Q03265	218	K	xxxxxxxxxG_K_Txxxxxxxxx
Q03265	230	K	xxxxxxxxxx_K_Rxxxxxxxxx
Q03265	531	K	xxxxxxxxxG_K_xxxxxxxKxx
Q03265	161	K	xxxxxxxxxG_K_Gxxxxxxxxx
Q04207	122	K	xxxxxxxxxx_K_Kxxxxxxxxx
Q04207	310	K	xxxxxxxxxx_K_Sxxxxxxxxx
Q04447	304	K	xxxxxxxxxx_K_Hxxxxxxxxx
Q04736	136	K	xxxxxxxxxG_K_Sxxxxxxxxx
Q04750	675	K	xxxxxxxxDx_K_xxxxxxxxxx
Q04750	247	K	xxxxxxxxDx_K_xxxxxxxxxx
Q04750	119	K	xxxxxxxxxx_K_Dxxxxxxxxx
Q04750	441	K	xxxxxxxxxx_K_Dxxxxxxxxx
Q04750	174	K	xxxxxxxxDx_K_xxxxxxxxxx
Q04750	652	K	xxxxxxxxxx_K_xDxxxxxxxx
Q04750	551	K	xxxxxxxxxF_K_Nxxxxxxxxx
Q04750	542	K	xxxxxxxxxN_K_Vxxxxxxxxx
Q04887	249	K	xxxxxxxxxx_K_VDxxxxxxxx
Q04899	175	K	xxxxxxxxxx_K_Hxxxxxxxxx
Q05793	606	K	xxxxxxxxxx_K_VDxxxxxxxx
Q05816	82	K	xxxxxxxxxx_K_Txxxxxxxxx
Q05909	899	K	xxxxxxxxxx_K_Hxxxxxxxxx
Q05920	316	K	xxxxxxxxxD_K_Hxxxxxxxxx
Q05CL8	276	K	xxxxxxxxxD_K_Vxxxxxxxxx
Q05CL8	504	K	xxxxxxxxxx_K_Hxxxxxxxxx
Q05CL8	128	K	xxxxxxxxxP_K_Nxxxxxxxxx
Q06831	254	K	xxxxxxxxxx_K_HxxxxxxKxx
Q06890	67	K	xxxxxxxxxx_K_Sxxxxxxxxx
Q07113	1109	K	xxxxxxxxxx_K_Rxxxxxxxxx
Q07113	2041	K	xxxxxxxxxK_K_Sxxxxxxxxx
Q07231	538	K	xxxxxxxxxx_K_Sxxxxxxxxx
Q07279	275	K	xxxxxxxxxx_K_Nxxxxxxxxx
Q07279	277	K	xxxxxxxxxN_K_Vxxxxxxxxx
Q07417	72	K	xxxxxxxxxx_K_Kxxxxxxxxx
Q08122	309	K	xxxxxxxxxx_K_Sxxxxxxxxx
Q08288	292	K	xxxxxxxxxx_K_Kxxxxxxxxx
Q08288	165	K	xxxxxxxxxT_K_Vxxxxxxxxx
Q08288	170	K	xxxxxxxxxx_K_Txxxxxxxxx
Q08288	14	K	xxxxxxxxxx_K_Kxxxxxxxxx
Q08288	61	K	xxxxxxxxxG_K_Gxxxxxxxxx
Q08376	284	K	xxxxxxxxxG_K_Txxxxxxxxx
Q08775	324	K	xxxxxxxxDx_K_xxxxxxxxxx
Q08874	45	K	xxxxxxxxxS_K_xxxxxxxxxx
Q08943	228	K	xxxxxxxxxG_K_Txxxxxxxxx
Q08943	90	K	xxxxxxxxxx_K_Txxxxxxxxx
Q08943	661	K	xxxxxxxxxx_K_Sxxxxxxxxx
Q09143	477	K	xxxxxxxxxP_K_Nxxxxxxxxx
Q0HA38	1180	K	xxxxxxxxxx_K_Rxxxxxxxxx
Q0KL02	2822	K	xxxxxxxxxx_K_Rxxxxxxxxx
Q0P678	785	K	xxxxxxxxxG_K_xxxxxxxxxx
Q0P678	506	K	xxxxxxxxxx_K_Rxxxxxxxxx
Q0P678	627	K	xxxxxxxxxG_K_xxxxxxxKxx
Q0P678	631	K	xxxxxxxxxx_K_Sxxxxxxxxx
Q0P678	634	K	xxxxxxxxxx_K_Kxxxxxxxxx
Q0P678	647	K	xxxxxxxxxx_K_Txxxxxxxxx
Q0P678	779	K	xxxxxxxxxS_K_xxxxxxxxxx
Q0P678	618	K	xxxxxxxxxx_K_Gxxxxxxxxx
Q0VAV2	41	K	xxxxxxxxxS_K_xxxxxxxxxx
Q0VAV2	44	K	xxxxxxxxxx_K_Txxxxxxxxx
Q0VBD0	310	K	xxxxxxxxxL_K_Nxxxxxxxxx
Q0VBL3	131	K	xxxxxxxxxx_K_Nxxxxxxxxx
Q0VBL3	169	K	xxxxxxxxxx_K_Txxxxxxxxx
Q0VE29	88	K	xxxxxxxxxx_K_Hxxxxxxxxx
Q0VG62	5	K	xxxxxxxxxx_K_xxxxKxxxxx
Q0VG62	7	K	xxxxxxxxxx_K_Gxxxxxxxxx
Q11011	337	K	xxxxxxxxxP_K_Nxxxxxxxxx
Q11011	833	K	xxxxxxxxxx_K_Dxxxxxxxxx
Q11011	572	K	xxxxxxxxxL_K_Nxxxxxxxxx
Q11011	822	K	xxxxxxxxxx_K_HxxxxxxKxx
Q14AX6	490	K	xxxxxxxxxx_K_Dxxxxxxxxx
Q14B71	705	K	xxxxxxxxxx_K_Nxxxxxxxxx
Q14C51	539	K	xxxxxxxxxD_K_Hxxxxxxxxx
Q14C51	556	K	xxxxxxxxxx_K_Sxxxxxxxxx
Q14C51	600	K	xxxxxxxxxx_K_Kxxxxxxxxx
Q14DN9	361	K	xxxxxxxxxG_K_Txxxxxxxxx
Q1HFZ0	95	K	xxxxxxxxxL_K_Nxxxxxxxxx
Q1W617	1066	K	xxxxxxxxxx_K_HxxxxxxKxx
Q2KHI9	956	K	xxxxxxxxxG_K_Sxxxxxxxxx
Q2KN98	726	K	xxxxxxxxxx_K_HxxxxxxKxx
Q2TBE6	154	K	xxxxxxxxxx_K_NExxxxxxxx
Q2TL60	7	K	xxxxxxxxxG_K_Sxxxxxxxxx
Q2TPA8	466	K	xxxxxxxxxG_K_xxxxxxxxxx
Q2TPA8	236	K	xxxxxxxxxx_K_Sxxxxxxxxx
Q2VPQ9	6	K	xxxxxxxxxx_K_Txxxxxxxxx
Q2VPQ9	91	K	xxxxxxxxxx_K_Sxxxxxxxxx
Q2VPQ9	74	K	xxxxxxxxxx_K_NDxxxxxxxx
Q2VPQ9	69	K	xxxxxxxxxx_K_Nxxxxxxxxx
Q32M00	112	K	xxxxxxxxxG_K_Txxxxxxxxx
Q9R0X4	423	K	xxxxxxxxxx_K_Sxxxxxxxxx
Q9R0X4	432	K	xxxxxxxxxx_K_Kxxxxxxxxx
Q9R0X4	155	K	xxxxxxxxxx_K_Hxxxxxxxxx
Q9R0X4	294	K	xxxxxxxxxx_K_Sxxxxxxxxx
Q33DR2	98	K	xxxxxxxxxx_K_Gxxxxxxxxx
Q33DR3	263	K	xxxxxxxxxx_K_Sxxxxxxxxx
Q3TC72	202	K	xxxxxxxxxG_K_xxxxxxxxxx
Q3TCX3	551	K	xxxxxxxxxA_K_Kxxxxxxxxx
Q3TDN2	167	K	xxxxxxxxxx_K_Rxxxxxxxxx
Q3THK3	407	K	xxxxxxxxxS_K_xxxxxxxxxx
Q3THK3	435	K	xxxxxxxxxG_K_Sxxxxxxxxx
Q3TIX9	492	K	xxxxxxxxxx_K_Nxxxxxxxxx
Q3TIX9	458	K	xxxxxxxxxx_K_NNxxxxxxxx
Q3TIX9	259	K	xxxxxxxxxY_K_Nxxxxxxxxx
Q3TJD7	238	K	xxxxxxxxxx_K_Txxxxxxxxx
Q3TKT4	207	K	xxxxxxxxxx_K_Rxxxxxxxxx
Q3TKY6	200	K	xxxxxxxxxx_K_Nxxxxxxxxx
Q3TKY6	183	K	xxxxxxxxxx_K_NExxxxxxxx
Q3TKY6	192	K	xxxxxxxxxx_K_Kxxxxxxxxx
Q3TLH4	1928	K	xxxxxxxxxG_K_Sxxxxxxxxx
Q3TLP5	101	K	xxxxxxxxDx_K_xxxxxxxxxx
Q3TN34	608	K	xxxxxxxxxx_K_NExxxxxxxx
Q3TNH5	120	K	xxxxxxxxxx_K_Kxxxxxxxxx
Q3TQI7	140	K	xxxxxxxxxP_K_Nxxxxxxxxx
Q3TUF7	189	K	xxxxxxxxxx_K_Rxxxxxxxxx
Q3TUF7	25	K	xxxxxxxxxx_K_Rxxxxxxxxx
Q3TUF7	449	K	xxxxxxxxxG_K_Sxxxxxxxxx
Q3TUF7	209	K	xxxxxxxxxx_K_Txxxxxxxxx
Q3TUF7	1289	K	xxxxxxxxxx_K_Txxxxxxxxx
Q3TUF7	1095	K	xxxxxxxxxx_K_Txxxxxxxxx
Q3TUH1	68	K	xxxxxxxxxx_K_Nxxxxxxxxx
Q3TV65	215	K	xxxxxxxxxx_K_Rxxxxxxxxx
Q3TV65	130	K	xxxxxxxxxK_K_Sxxxxxxxxx
Q3TV65	129	K	xxxxxxxxxA_K_Kxxxxxxxxx
Q3TXS7	720	K	xxxxxxxxxD_K_Hxxxxxxxxx
Q3TXS7	803	K	xxxxxxxxxx_K_Sxxxxxxxxx
Q3TYA6	548	K	xxxxxxxxxx_K_Hxxxxxxxxx
Q3TZZ7	163	K	xxxxxxxxxx_K_VDxxxxxxxx
Q3TZZ7	529	K	xxxxxxxxxx_K_Dxxxxxxxxx
Q3TZZ7	502	K	xxxxxxxxxx_K_Txxxxxxxxx
Q3U0M1	338	K	xxxxxxxxxY_K_Nxxxxxxxxx
Q3U0V1	110	K	xxxxxxxxxx_K_Rxxxxxxxxx
Q3U0V1	72	K	xxxxxxxxxx_K_Dxxxxxxxxx
Q3U132	435	K	xxxxxxxxxx_K_Sxxxxxxxxx
Q3U186	124	K	xxxxxxxxxx_K_Kxxxxxxxxx
Q3U186	35	K	xxxxxxxxxx_K_Kxxxxxxxxx
Q3U1G5	307	K	xxxxxxxxxx_K_xDxxxxxxxx
Q3U1J4	191	K	xxxxxxxxxx_K_Txxxxxxxxx
Q3U1J4	1067	K	xxxxxxxxxG_K_xxxxxxxxxx
Q3U2A8	222	K	xxxxxxxxxx_K_Hxxxxxxxxx
Q3U319	20	K	xxxxxxxxxx_K_Kxxxxxxxxx
Q3U381	367	K	xxxxxxxxxG_K_Sxxxxxxxxx
Q3U5C8	545	K	xxxxxxxxxK_K_Sxxxxxxxxx
Q3U7R1	804	K	xxxxxxxxxT_K_xxxxxxxxxx
Q3U821	331	K	xxxxxxxxxx_K_Dxxxxxxxxx
Q3U8K7	38	K	xxxxxxxxxx_K_Dxxxxxxxxx
Q3U9G9	519	K	xxxxxxxxxx_K_Nxxxxxxxxx
Q3U9G9	530	K	xxxxxxxxDx_K_xxxxxxxxxx
Q3U9G9	64	K	xxxxxxxxxx_K_Sxxxxxxxxx
Q3U9G9	42	K	xxxxxxxxxx_K_Dxxxxxxxxx
Q3UA16	67	K	xxxxxxxxxY_K_Nxxxxxxxxx
Q3UB74	221	K	xxxxxxxxxx_K_xxxxKxxxxx
Q3UE37	306	K	xxxxxxxxxx_K_Rxxxxxxxxx
Q3UEB3	256	K	xxxxxxxxxG_K_xxxxxxxxxx
Q3UFM5	550	K	xxxxxxxxxL_K_Nxxxxxxxxx
Q3UFS4	64	K	xxxxxxxxxL_K_Nxxxxxxxxx
Q3UFT3	183	K	xxxxxxxxxG_K_xxxxxxxxxx
Q3UGC7	200	K	xxxxxxxxxx_K_Kxxxxxxxxx
Q3UHB1	258	K	xxxxxxxxxx_K_Gxxxxxxxxx
Q3UHB1	246	K	xxxxxxxxxx_K_Dxxxxxxxxx
Q3UHB1	314	K	xxxxxxxxxx_K_Dxxxxxxxxx
Q3UHR0	1737	K	xxxxxxxxxx_K_Txxxxxxxxx
Q3UHR0	1739	K	xxxxxxxxxT_K_Vxxxxxxxxx
Q3UHX0	176	K	xxxxxxxxxx_K_Kxxxxxxxxx
Q3UHX2	172	K	xxxxxxxxxx_K_Rxxxxxxxxx
Q3UHX2	132	K	xxxxxxxxxG_K_Txxxxxxxxx
Q3UHX9	163	K	xxxxxxxxxx_K_Hxxxxxxxxx
Q3UHX9	244	K	xxxxxxxxxx_K_Gxxxxxxxxx
Q3UIK4	63	K	xxxxxxxxxx_K_Rxxxxxxxxx
Q3UJD6	51	K	xxxxxxxxxx_K_Dxxxxxxxxx
Q3ULD5	269	K	xxxxxxxxxx_K_Sxxxxxxxxx
Q3ULF4	619	K	xxxxxxxxxT_K_xxxxxxxxxx
Q3ULF4	494	K	xxxxxxxxxx_K_Gxxxxxxxxx
Q3UMM4	178	K	xxxxxxxxxx_K_Txxxxxxxxx
Q3UMR5	331	K	xxxxxxxxxx_K_Rxxxxxxxxx
Q3UN02	259	K	xxxxxxxxxx_K_xDxxxxxxxx
Q3UN90	37	K	xxxxxxxxxx_K_Hxxxxxxxxx
Q3UPF5	222	K	xxxxxxxxxx_K_Hxxxxxxxxx
Q3UPF5	779	K	xxxxxxxxxx_K_Dxxxxxxxxx
Q3UPL0	646	K	xxxxxxxxxL_K_Nxxxxxxxxx
Q3UPP8	40	K	xxxxxxxxxK_K_Sxxxxxxxxx
Q3UQ28	1468	K	xxxxxxxxxL_K_Nxxxxxxxxx
Q3UQ28	116	K	xxxxxxxxxY_K_Nxxxxxxxxx
Q3URD3	247	K	xxxxxxxxxx_K_HxxxxxxKxx
Q3URD3	73	K	xxxxxxxxxx_K_Sxxxxxxxxx
Q3URE1	411	K	xxxxxxxxxT_K_Vxxxxxxxxx
Q3URE1	532	K	xxxxxxxxDx_K_xxxxxxxxxx
Q3URK1	82	K	xxxxxxxxxx_K_Dxxxxxxxxx
Q3URQ0	36	K	xxxxxxxxxT_K_xxxxxxxxxx
Q3URU2	1320	K	xxxxxxxxxx_K_Dxxxxxxxxx
Q3USH5	567	K	xxxxxxxxDx_K_xxxxxxxxxx
Q3UTJ2	270	K	xxxxxxxxxx_K_Hxxxxxxxxx
Q3UTJ2	299	K	xxxxxxxxxG_K_Sxxxxxxxxx
Q3UUI3	65	K	xxxxxxxxxx_K_Rxxxxxxxxx
Q3UV70	194	K	xxxxxxxxxx_K_HxxxxxxKxx
Q3UVK0	877	K	xxxxxxxxxx_K_Kxxxxxxxxx
Q3UW53	94	K	xxxxxxxxxx_K_NDxxxxxxxx
Q3UXZ9	1193	K	xxxxxxxxxx_K_Sxxxxxxxxx
Q3UXZ9	256	K	xxxxxxxxxx_K_Dxxxxxxxxx
Q3UYV9	741	K	xxxxxxxxxY_K_Nxxxxxxxxx
Q3UYV9	574	K	xxxxxxxxxx_K_Txxxxxxxxx
Q3UYV9	330	K	xxxxxxxxxx_K_Txxxxxxxxx
Q3V1V3	92	K	xxxxxxxxxx_K_Kxxxxxxxxx
Q3V1V3	93	K	xxxxxxxxxx_K_xxxxKxxxxx
Q3V1V3	168	K	xxxxxxxxxx_K_Kxxxxxxxxx
Q3V300	395	K	xxxxxxxxxA_K_Kxxxxxxxxx
Q3V3R1	817	K	xxxxxxxxxx_K_Rxxxxxxxxx
Q3V3R1	835	K	xxxxxxxxxG_K_Gxxxxxxxxx
Q3V3R1	595	K	xxxxxxxxxx_K_Gxxxxxxxxx
Q3V3R1	762	K	xxxxxxxxxx_K_Kxxxxxxxxx
Q3V3R1	919	K	xxxxxxxxxx_K_Kxxxxxxxxx
Q3V3R4	765	K	xxxxxxxxxD_K_Hxxxxxxxxx
Q3ZK22	509	K	xxxxxxxxxG_K_Pxxxxxxxxx
Q3ZRW6	458	K	xxxxxxxxxx_K_Gxxxxxxxxx
Q497V5	670	K	xxxxxxxxxx_K_Hxxxxxxxxx
Q497V5	177	K	xxxxxxxxxx_K_Rxxxxxxxxx
Q497V5	69	K	xxxxxxxxxK_K_Sxxxxxxxxx
Q4G0F8	251	K	xxxxxxxxxx_K_xxxxKxxxxx
Q4G0F8	202	K	xxxxxxxxxx_K_Kxxxxxxxxx
Q4G0F8	203	K	xxxxxxxxxx_K_Kxxxxxxxxx
Q4G0F8	204	K	xxxxxxxxxx_K_Kxxxxxxxxx
Q4G0F8	205	K	xxxxxxxxxx_K_Dxxxxxxxxx
Q4G0F8	900	K	xxxxxxxxxY_K_Nxxxxxxxxx
Q4KWH5	890	K	xxxxxxxxxx_K_Gxxxxxxxxx
Q4PJX1	238	K	xxxxxxxxxx_K_Kxxxxxxxxx
Q4PJX1	227	K	xxxxxxxxxx_K_Gxxxxxxxxx
Q4VA53	507	K	xxxxxxxxxx_K_Dxxxxxxxxx
Q4VA53	1196	K	xxxxxxxxxG_K_Kxxxxxxxxx
Q4VA53	845	K	xxxxxxxxxx_K_Sxxxxxxxxx
Q4VA53	698	K	xxxxxxxxxS_K_xxxxxxxxxx
Q4VAA2	159	K	xxxxxxxxxx_K_Sxxxxxxxxx
Q4VAA2	226	K	xxxxxxxxxx_K_HxxxxxxKxx
Q4VBE8	341	K	xxxxxxxxxx_K_Hxxxxxxxxx
Q4VC33	38	K	xxxxxxxxxx_K_Nxxxxxxxxx
Q501J6	373	K	xxxxxxxxxx_K_Sxxxxxxxxx
Q501J6	53	K	xxxxxxxxxx_K_Nxxxxxxxxx
Q501J6	195	K	xxxxxxxxxx_K_Sxxxxxxxxx
Q52KI8	36	K	xxxxxxxxxx_K_Kxxxxxxxxx
Q52KI8	511	K	xxxxxxxxxV_K_Nxxxxxxxxx
Q52KR3	2503	K	xxxxxxxxxx_K_Gxxxxxxxxx
Q569Z5	666	K	xxxxxxxxxF_K_Nxxxxxxxxx
Q569Z5	776	K	xxxxxxxxxG_K_Gxxxxxxxxx
[truncated: 2,916 more rows]
